# Supplementary material for: Transcriptomic and Metabolomic Analysis of the Response of Quinoa Seedlings to Low Temperatures
Source: Biomolecules. 2022 Jul 12;12(7):977. doi: 10.3390/biom12070977 (PMC9312504; doi:10.3390/biom12070977)
Supplement: Supplementary file 1 [file biomolecules-12-00977-s001.zip]

Archive with 7 entries (7 files):
- Fig.S1.pdf
- Fig.S2.pdf
- Fig.S3.pdf
- Fig.S4.pdf
- Table.S1.xls
- Table.S2.xls
- Table.S3.xls
