# Supplementary material for: Transcriptomic and Metabolomic Analysis of the Response of Quinoa Seedlings to Low Temperatures
Source: Biomolecules. 2022 Jul 12;12(7):977. doi: 10.3390/biom12070977 (PMC9312504; doi:10.3390/biom12070977)
Supplement: Supplementary file 1 [file biomolecules-12-00977-s001.zip › Table.S1.xls]

## Sheet: Primer design
Table S1.The Primer design of genes.
ID	Primer	Primer sequence(5'to3')	Base number	Total OD value
1	gene-LOC110710574F	CTCGTCTCTACCTTCTAA	18	2
2	gene-LOC110710574R	TCTCTTCAATCTCCTTCA	18	2
3	gene-LOC110724846F	GGAATAACAGCAGGAATA	18	2
4	gene-LOC110724846R	AATGTGACCATAATCTCC	18	2
5	gene-LOC110728173F	CTCTTGGTGACTTGATTC	18	2
6	gene-LOC110728173R	ATATTCCTGCTGTTATTCC	19	2
7	gene-LOC110703412F	CAAGATTGAGGCAGTAAC	18	2
8	gene-LOC110703412R	CATCAGTTCCAGGTATTG	18	2
9	gene-LOC110703416F	AGGTATTGGTTAAGATTGAG	20	2
10	gene-LOC110703416R	CATCAGTTCCAGGTATTG	18	2
11	gene-LOC110687794F	GATGAGGTTCTTGACTAC	18	2
12	gene-LOC110687794R	CTATCACCTTACCTGTTG	18	2
13	gene-LOC110729149F	ATCCAGTAGTCATTATGC	18	2
14	gene-LOC110729149R	AACAACTCCACATTCTAG	18	2
15	gene-LOC110705708F	GCAAGGAAGACTATTGAT	18	2
16	gene-LOC110705708R	ATATACACCGTAGGCTAT	18	2
17	gene-LOC110702874F	GATTCTTCGTCGTTACTT	18	2
18	gene-LOC110702874R	CAATACCACATTCAATTCC	19	2
19	gene-LOC110700051F	GAGTAATAGGACCTCAATG	19	2
20	gene-LOC110700051R	TTATCACAGCAACAGTTC	18	2
45	gene-LOC110710941F	ATAGAGATGGATATGAAGAAG	21	4
46	gene-LOC110710941R	GTAATGACTGAGGACTTG	18	4
47	gene-LOC110709812F	TCAGCCAGTAGATGTTAT	18	5
48	gene-LOC110709812R	AAGCCAAGGAATCATTAG	18	6
49	gene-LOC110687796F	GACTATAAGACCTCAGAAG	19	7
50	gene-LOC110687796R	TCTATCACCTTACCAGTT	18	8
51	gene-LOC110718230F	AGTCTCACATTGAATCTG	18	9
52	gene-LOC110718230R	CTTATGGATAGCCTTAGC	18	10
53	gene-LOC110682188F	CTTAGGAGAACTTGTAGG	18	11
54	gene-LOC110682188R	CTGCTGAGATTGATAGTC	18	12
55	TUB6 - F	TGAGAACGCAGATGAGTGTATG	22	13
56	TUB6 - R	GAAACGAAGACAGCAAGTGACA	22	14
