# Supplementary material for: Transcriptomic and Metabolomic Analysis of the Response of Quinoa Seedlings to Low Temperatures
Source: Biomolecules. 2022 Jul 12;12(7):977. doi: 10.3390/biom12070977 (PMC9312504; doi:10.3390/biom12070977)
Supplement: Supplementary file 1 [file biomolecules-12-00977-s001.zip › Table.S2.xls]

## Sheet: Sheet1
Index	Sub Class	Formula	Compounds	物质	Class I	物质一级分类	Class II	物质二级分类	CAS	Level	AY1-1	AY1-2	AY1-3	BY1-1	BY1-2	BY1-3	CY1-1	CY1-2	CY1-3	AY2-1	AY2-2	AY2-3	BY2-1	BY2-2	BY2-3	CY2-1	CY2-2	CY2-3	mix01	mix02	mix03	mix04
pmb0782	1	C5H11N	Piperidine	哌啶	Alkaloids	生物碱	Piperidine alkaloids	哌啶类生物碱	110-89-4	3	7012600	7036700	6431900	5877400	5410800	6194500	1023400	1773800	1505000	5722700	6428400	5616500	5801100	5971600	4454400	1113800	1299600	977660	5848000	6273300	5341200	5442300
Lmqp000873	2	C4H4O3	Succinic anhydride	琥珀酸酐	Organic acids	有机酸	Organic acids	有机酸	108-30-5	3	69499	103390	109840	131370	128140	124690	271750	296310	302640	137570	133700	125830	126910	223810	231990	478550	295270	259990	225010	242150	240690	206250
MWSmce461	1	C4H7NO2	L-Azetidine-2-carboxylic acid	L-吖啶-2-羧酸	Amino acids and derivatives	氨基酸及其衍生物	Amino acids and derivatives	氨基酸及其衍生物	2133-34-8	3	97705	79347	71995	72724	66211	123450	9544.3	28176	10564	78684	94789	113940	141730	121780	81183	12164	29637	14098	37733	83415	70431	49180
pme3011	1	C4H9NO2	γ-Aminobutyric acid	γ-氨基丁酸	Organic acids	有机酸	Organic acids	有机酸	56-12-2	2	309970	311320	261190	60868	97959	97776	35835	51906	67668	204030	153420	268960	56043	37366	46891	38425	25946	17968	245800	209080	238630	191530
pme3033	1	C4H9NO2	N,N-Dimethylglycine	N,N-二甲基甘氨酸	Amino acids and derivatives	氨基酸及其衍生物	Amino acids and derivatives	氨基酸及其衍生物	1118-68-9	3	349810	433670	293550	106510	124150	124720	76067	165910	142250	276890	250290	290900	101300	152210	192760	178440	112030	126200	248520	224280	250650	168400
mws0576	1	C4H8O3	3-Hydroxybutyric acid	3-羟基丁酸	Organic acids	有机酸	Organic acids	有机酸	300-85-6	2	134570	134900	147770	195840	152960	197940	72680	94634	77852	120000	71475	88607	101370	105960	102310	36507	53557	24961	219470	300950	305430	302440
pme1975	1	C3H4O4	Malonic acid	丙二酸	Organic acids	有机酸	Organic acids	有机酸	141-82-2	3	104540	124300	108620	139790	104130	161990	30521	46152	71819	80574	84817	65061	31497	120910	93421	51217	40937	20653	222720	203850	199240	119270
mws0255	2	C4H5N3O	Cytosine	胞嘧啶	Nucleotides and derivatives	核苷酸及其衍生物	Nucleotides and derivatives	核苷酸及其衍生物	71-30-7	3	2626100	2181000	2923100	1509600	2088400	1660400	1976600	3497800	1880300	23654000	11910000	17215000	34007000	22744000	6448100	3107600	12297000	5433900	6614500	7920400	7025000	7597800
pme2122	2	C5H9N3	Histamine	组胺	Alkaloids	生物碱	Alkaloids	生物碱	51-45-6	3	9824200	7862800	10055000	5518600	7482500	5889000	7632900	12951000	6852800	72810000	40814000	55102000	91139000	66242000	22871000	11632000	42746000	21209000	25069000	29183000	27185000	29286000
pme0006	1	C5H9NO2	L-Proline	L-脯氨酸	Amino acids and derivatives	氨基酸及其衍生物	Amino acids and derivatives	氨基酸及其衍生物	147-85-3	1	11748000	16977000	13870000	4488500	5179000	6452500	11510000	16294000	15071000	8380700	10509000	13035000	6091400	4075800	4201000	10846000	11442000	11252000	16049000	12675000	13866000	14495000
pmb1096	1	C8H7N	Indole	吲哚	Alkaloids	生物碱	Plumerane	吲哚类生物碱	120-72-9	1	566860	472760	528140	372590	408190	382450	93231	103060	93334	516650	398650	456570	333960	427590	373080	89847	69449	83583	572240	701110	577600	497840
mws0256	1	C5H11NO2	L-Valine	L-缬氨酸	Amino acids and derivatives	氨基酸及其衍生物	Amino acids and derivatives	氨基酸及其衍生物	72-18-4	2	10263000	10241000	9176500	8737800	9393100	9499800	2521200	3110900	3245800	9088900	11801000	10981000	8708700	9976800	6998100	2871500	2696500	2311900	10169000	10169000	9936200	9412100
mws0470	2	C4H6O4	Methylmalonic acid*	甲基丙二酸*	Organic acids	有机酸	Organic acids	有机酸	516-05-2	1	6768700	5113300	9355200	7702800	8155500	8249800	29537000	16509000	26334000	11153000	5370100	5033400	6701200	16004000	9505600	35551000	18102000	16671000	11099000	17043000	10240000	17656000
mws0192	2	C4H6O4	Succinic acid*	琥珀酸*	Organic acids	有机酸	Organic acids	有机酸	110-15-6	1	5712800	7658500	7610400	9286300	10281000	11617000	20583000	21435000	21281000	10872000	7010300	6380600	10067000	13158000	13970000	18826000	24773000	23277000	16202000	14325000	15883000	15609000
mws0147	1	C5H10O3	β-Hydroxyisovaleric acid	β-羟基异戊酸	Organic acids	有机酸	Organic acids	有机酸	625-08-1	1	941910	802970	840010	780240	923320	833460	341130	356910	331440	521880	411270	432810	481800	566810	446140	217680	226160	245060	997560	859500	908640	1033600
pme3096	2	C3H5NO4	Aminomalonic acid	氨基丙二酸	Organic acids	有机酸	Organic acids	有机酸	1068-84-4	3	186900	132920	248410	223740	206210	375310	662210	535630	826810	276660	132480	167990	198790	438080	387680	1205300	481370	655570	371630	347930	389030	411750
mws0671	1	C4H9NO3	L-Homoserine*	L-高丝氨酸*	Amino acids and derivatives	氨基酸及其衍生物	Amino acids and derivatives	氨基酸及其衍生物	672-15-1	3	1883800	1901900	1809100	1525000	1641100	1620600	716170	1063700	921940	1592400	1888200	1728200	1397200	1391600	1213400	784400	755280	643020	1646800	1581200	1436100	1542000
mws0230	1	C4H9NO3	L-Threonine*	L-苏氨酸*	Amino acids and derivatives	氨基酸及其衍生物	Amino acids and derivatives	氨基酸及其衍生物	72-19-5	3	1716400	1834500	1865800	1288600	1630700	1596100	725120	896720	943810	1634200	1846400	1728700	1445000	1421500	1138700	687840	764290	704580	1679600	1519700	1519200	1491900
pmp001287	1	C8H9N	N-Benzylmethylene isomethylamine	N-苯亚甲基异甲胺	Alkaloids	生物碱	Alkaloids	生物碱	-	1	9005900	8044400	7072900	5694500	5367100	6075700	615060	1240100	887590	7634400	7038400	7403200	5389600	5171300	3579200	464390	457630	368540	10559000	11856000	11222000	9413100
pma0134	2	C4H8O4	D-Threose	D-苏阿糖	Others	其它类	Saccharides and Alcohols	糖及醇类	95-43-2	3	125770	145560	153650	112430	107960	117890	105430	123070	91707	425380	214090	297950	329830	256240	128630	122370	143640	96031	229450	250160	133700	196060
Lmbn002737	2	C8H8O	3-Methylbenzaldehyde	3-甲基苯甲醛	Others	其它类	Others	其它	620-23-5	3	60191	119590	88476	120270	56734	67009	110750	50861	81431	193820	177730	153120	193760	193710	185900	207400	183740	162840	102620	109810	97336	111450
pme0195	1	C3H7NO2S	L-Cysteine	L-半胱氨酸	Amino acids and derivatives	氨基酸及其衍生物	Amino acids and derivatives	氨基酸及其衍生物	52-90-4	3	107150	127180	157550	135830	94081	98006	117060	255630	153830	33134	15443	21810	29040	31433	27930	12296	25579	21767	53773	60975	65960	46325
pme0241	2	C7H6O2	Benzoic acid	苯甲酸	Phenolic acids	酚酸类	Phenolic acids	酚酸类	65-85-0	3	40733	26956	39028	34624	68071	55677	73257	73631	84973	83886	46637	60182	60848	39808	51759	130790	64226	86473	70715	93767	79517	92065
Lmbn001930	2	C7H6O2	2-Hydroxybenzaldehyde (Salicylaldehyde)	2-羟基苯甲醛 (水杨醛)	Phenolic acids	酚酸类	Phenolic acids	酚酸类	90-02-8	3	34219	32386	20508	36879	30160	22533	23684	10242	18460	120190	83315	92340	129590	139380	142400	38826	39216	24624	73421	85008	58746	84046
pme0490	1	C6H5NO2	Nicotinic acid (Vitamin B3)	烟酸 (维生素 B3)	Others	其它类	Vitamin	维生素	59-67-6	2	407660	412760	452940	171810	125050	170370	140150	267720	248510	530880	330430	351910	160790	120480	161280	211820	191690	91804	350500	435480	329350	342370
pme1216	1	C6H5NO2	2-Picolinic acid	2-吡啶甲酸	Organic acids	有机酸	Organic acids	有机酸	98-98-6	3	152310	178730	155190	36702	46141	30071	35485	49613	57560	156100	81795	122030	19828	17054	22121	34960	48052	18427	101330	96477	101560	98340
mws0566	2	C7H8O2	4-Methylcatechol	4-甲基儿茶酚	Phenolic acids	酚酸类	Phenolic acids	酚酸类	452-86-8	3	9	17231	26205	29978	30421	28936	31630	52184	26590	10754	10073	10200	10672	16607	29486	34401	24277	18372	24922	22052	12205	16803
MWSmce118	2	C5H6N2O2	Imidazole-4-Acetic Acid*	咪唑-4-乙酸*	Organic acids	有机酸	Organic acids	有机酸	645-65-8	2	32418	51443	28714	24425	35228	31825	44025	56722	28159	111110	91652	96346	204720	158670	65611	34321	103170	32507	108420	74851	92231	62972
MWSmce448	2	C5H6N2O2	Imidazol-1-yl-acetic acid*	咪唑-1-乙酸*	Organic acids	有机酸	Organic acids	有机酸	22884-10-2	2	51886	27945	34363	27930	42646	36802	25717	17435	45265	115100	102770	101580	179870	109300	41360	23470	76194	56207	102300	83711	74306	63950
ML10181668	1	C6H11NO2	Cycloleucine	环亮氨酸	Amino acids and derivatives	氨基酸及其衍生物	Amino acids and derivatives	氨基酸及其衍生物	52-52-8	2	3862500	4270800	3477300	2521500	3180800	2590900	112790	903790	608170	3480800	3812900	3856600	3101800	2889000	2181400	312370	460940	379620	2550400	3349700	2686500	3055700
pmb0501	2	C5H14N4	Agmatine	胍丁胺	Alkaloids	生物碱	Alkaloids	生物碱	306-60-5	3	16879	17672	16670	14367	9936.2	7797.5	16119	18266	16522	31491	13971	28192	28548	27137	21345	13133	11153	12611	14227	13985	16619	10289
Zmpn000638	1	C4H9N3O2	3-Guanidinopropionic acid	3-胍基丙酸	Organic acids	有机酸	Organic acids	有机酸	353-09-3	3	71505	108860	113000	51576	58044	64370	61508	92017	69293	69499	51656	38932	63433	47395	26980	25426	39934	16411	67259	68198	75073	67214
pmp001198	1	C6H13NO2	6-Deoxyfagomine	6-脱氧荞麦碱	Alkaloids	生物碱	Piperidine alkaloids	哌啶类生物碱	197449-09-5	1	14079000	13193000	12519000	12564000	11555000	13724000	2706300	4188000	3905500	11181000	12966000	11674000	12259000	12247000	9937500	2982100	3449500	2804000	12748000	13645000	12671000	11147000
mws0227	1	C6H13NO2	L-Leucine*	L-亮氨酸*	Amino acids and derivatives	氨基酸及其衍生物	Amino acids and derivatives	氨基酸及其衍生物	61-90-5	1	5830900	5327700	4829200	5023900	4457200	4939100	1308900	2005900	1614500	4584600	5026000	4656700	4436100	4446500	3601300	1406700	1532200	1296600	4857500	5242800	4913500	4371600
pme0274	1	C6H13NO2	6-Aminocaproic acid	6-氨基己酸	Organic acids	有机酸	Organic acids	有机酸	60-32-2	2	795940	1641200	1657400	1286400	1377300	1246300	272060	322490	40581	1207900	622840	921640	590490	1338200	910530	111250	102420	198550	812710	838900	1427100	1548300
mws0258	1	C6H13NO2	L-Isoleucine*	L-异亮氨酸*	Amino acids and derivatives	氨基酸及其衍生物	Amino acids and derivatives	氨基酸及其衍生物	73-32-5	1	5528700	5121400	4919200	4774600	4344400	4970900	1254600	1969400	1735000	4459600	5188100	4635800	4570600	4317600	3653800	1378600	1632700	1318100	5126600	5509400	4855700	4256700
mws1167	2	C4H4O5	Oxaloacetic acid	草酰乙酸	Organic acids	有机酸	Organic acids	有机酸	328-42-7	3	13025	16784	22658	20927	23256	15298	18296	20268	17961	14155	7615	4943.3	8014.3	23596	18632	28286	18337	19084	16762	12220	12224	17133
pme0243	2	C5H8O4	Glutaric acid	戊二酸	Organic acids	有机酸	Organic acids	有机酸	110-94-1	3	88137	65926	98430	267770	274720	110820	161240	133590	72171	140010	138560	395600	441530	470720	374650	301710	275800	247290	606870	629990	415220	613890
Lmgn000160	1	C4H8N2O3	3-Ureidopropionic Acid	3-脲基丙酸	Organic acids	有机酸	Organic acids	有机酸	462-88-4	3	34910	53279	47256	39800	25602	41323	13830	19151	7819.4	21600	34950	26347	32363	28132	30653	7545.7	9742.8	4703.1	40360	37998	53180	41665
mws0341	1	C6H12O3	2-Hydroxyisocaproic acid	2-羟基异己酸	Organic acids	有机酸	Organic acids	有机酸	20312-37-2	3	268540	258340	303110	156050	203190	210700	138080	162890	144600	262330	225500	235600	163720	131950	156180	113200	85366	119010	170770	157200	152670	150620
mws0972	2	C6H12O3	6-Hydroxyhexanoic acid	6-羟基己酸	Organic acids	有机酸	Organic acids	有机酸	1191-25-9	3	51301	46291	59960	45578	51683	48437	59673	53869	79570	118840	92847	102000	90019	128490	102770	102730	122100	116290	69607	65926	61603	63966
pme2527	1	C5H12N2O2	L-Ornithine	L-鸟氨酸	Amino acids and derivatives	氨基酸及其衍生物	Amino acids and derivatives	氨基酸及其衍生物	70-26-8	3	1700500	1634600	1289000	1026600	1309700	1058200	144940	414050	326280	804990	835360	801070	670260	756660	672060	30662	59890	48162	937940	972630	943030	928870
MWS1882	1	C4H7NO4	Iminodiacetic acid	亚氨基二乙酸	Organic acids	有机酸	Organic acids	有机酸	142-73-4	1	479310	509270	600120	292470	243460	281570	599600	730630	744720	461250	651920	581410	316150	410860	370560	456330	590350	512240	661900	640180	655420	672840
mws0219	1	C4H7NO4	L-Aspartic Acid	L-天冬氨酸	Amino acids and derivatives	氨基酸及其衍生物	Amino acids and derivatives	氨基酸及其衍生物	56-84-8	1	5350100	6126300	5663100	3528500	2658100	3096500	6847600	8124500	8394800	5201200	7330000	6601100	4288500	4353800	4236800	5427300	6482000	5546700	7738500	7026000	7253500	7065600
Lmbn000198	2	C4H6O5	3-Dehydro-L-Threonic Acid*	3-脱氢-L-苏糖酸*	Others	其它类	Saccharides and Alcohols	糖及醇类	-	1	604540	600960	688640	426570	574830	495910	667040	1241900	1486700	1077100	616270	729460	703100	786920	990180	3236400	903130	1130700	2313700	1935200	1869300	1840900
mws0275	2	C4H6O5	L-Malic acid*	L-苹果酸*	Organic acids	有机酸	Organic acids	有机酸	97-67-6	1	2237900	2293200	2740900	1444100	2031000	1920300	3238100	4620200	5350700	4117700	2296000	2763200	2611900	2743500	4154200	12408000	3709500	4170800	9582400	8715800	8567200	8887000
Zmgn000503	2	C5H10O4	2,3-Dihydroxy-3-Methylbutanoic Acid	2,3-二羟基-3-甲基丁酸	Organic acids	有机酸	Organic acids	有机酸	1756-18-9	2	369800	433230	391100	248910	363280	310170	547160	609520	912520	673210	546090	410330	373310	622830	638520	1965900	641800	630060	1233700	1249800	1311800	1421900
Zmdp000972	1	C4H9NO2S	S-Methyl-L-cysteine	S-甲基-L-半胱氨酸	Amino acids and derivatives	氨基酸及其衍生物	Amino acids and derivatives	氨基酸及其衍生物	1187-84-4	2	3723300	3707100	3467500	2801100	2558300	2625900	477090	1081300	849610	4102500	3607900	3150700	3125400	2960400	2217200	602060	618210	446980	4337100	4776500	3132100	3598400
pme0057	1	C4H9NO2S	L-Homocysteine	L-高半胱氨酸	Amino acids and derivatives	氨基酸及其衍生物	Amino acids and derivatives	氨基酸及其衍生物	6027-13-0	3	51244	52498	32868	17211	31507	27899	7920.7	14887	11179	57331	55417	58247	41527	43498	28068	8839.1	17117	15829	40451	64244	38480	60210
pme0040	1	C5H5N5	Adenine	腺嘌呤	Nucleotides and derivatives	核苷酸及其衍生物	Nucleotides and derivatives	核苷酸及其衍生物	73-24-5	1	25354000	24725000	28018000	6632000	7444100	6702900	7547200	14000000	12381000	37937000	15593000	13826000	9133300	8504500	10047000	8728400	9029100	4737900	18990000	19682000	15216000	15745000
pmb0374	1	C5H5N5	2-Aminopurine	2-氨基嘌呤	Nucleotides and derivatives	核苷酸及其衍生物	Nucleotides and derivatives	核苷酸及其衍生物	452-06-2	1	6349300	8383400	6207400	1668300	1743100	1631900	2038900	2703000	2339100	5783900	5466700	6295700	1040600	1072800	1759100	1316400	1165800	1400400	3130300	3325500	3164300	2795700
HJKP000649	1	C8H9NO	N-benzylformamide*	正苄基甲酰胺*	Alkaloids	生物碱	Alkaloids	生物碱	6343-54-0	2	4664500	4683400	3917100	3543300	3053800	3680500	655530	1341400	1131900	4894500	4447100	3877000	3904000	3782300	2831600	949490	896070	603620	4879100	5855700	4147700	4541600
Lmgp000659	1	C8H9NO	2-Phenylacetamide*	2-苯乙酰胺*	Alkaloids	生物碱	Alkaloids	生物碱	103-81-1	3	6711700	7196500	5772500	4699800	4187100	4774400	913860	1849700	1485400	7059900	5940800	5866000	5209300	4636500	3595000	1070500	1171600	797480	7190400	7895400	5552200	5558200
mws0889	2	C4H8O5	D-Threonic Acid	D-苏糖酸	Others	其它类	Saccharides and Alcohols	糖及醇类	3909-12-4	1	334870	260500	339880	418440	353200	428890	711000	1033700	997520	267820	331270	249280	229580	299820	638570	909390	729410	502080	434800	471530	455490	505930
MWSmce466	2	C8H8O2	4'-Hydroxyacetophenone	4'-羟基苯乙酮	Phenolic acids	酚酸类	Phenolic acids	酚酸类	99-93-4	3	15809	15258	13025	15257	9723.8	9936.6	25302	13849	11798	31270	36142	38444	26919	29976	24758	28484	25491	28248	27703	21357	32450	29620
MWS1848	2	C8H8O2	Phenyl acetate	乙酸苯酯	Phenolic acids	酚酸类	Phenolic acids	酚酸类	122-79-2	3	12946	16440	12091	17833	28225	12925	13849	6237.4	17521	37057	26803	38073	26932	23996	24059	28742	25952	39346	18492	24625	14065	14420
mws1078	2	C7H7NO2	Anthranilic Acid	邻氨基苯甲酸	Phenolic acids	酚酸类	Phenolic acids	酚酸类	118-92-3	3	276600	311630	257220	192660	270460	247390	334410	301310	328670	682880	634660	508110	501880	423820	359450	588220	548500	443580	372730	371120	376390	336500
mws0146	2	C7H7NO2	Nicotinic Acid Methyl Ester(Methyl Nicotinate)	烟酸甲酯	Alkaloids	生物碱	Pyridine alkaloids	吡啶类生物碱	93-60-7	3	31895	40819	4541.9	28848	17123	33323	72282	37451	64080	45260	26802	41877	26708	28030	29604	58093	70698	55519	42491	41541	32365	63230
pma0948	2	C8H11NO	Phenylethanolamine	苯基乙醇胺	Alkaloids	生物碱	Alkaloids	生物碱	7568-93-6	3	507380	479260	544410	544110	458500	541180	593460	645580	556150	1393400	846740	1306900	1350700	969910	585070	680500	977490	753350	814470	911650	900040	765570
pme1002	2	C8H11NO	L-Tyramine	L-酪胺	Amino acids and derivatives	氨基酸及其衍生物	Amino acids and derivatives	氨基酸及其衍生物	51-67-2	1	950240	930220	921460	1042400	851990	978450	1070700	1185400	992700	2563900	1535400	2500300	2722800	2018000	1254700	1218800	1537800	1249600	1560100	1856400	1706300	1511800
mws0749	2	C7H6O3	4-Hydroxybenzoic acid	4-羟基苯甲酸	Phenolic acids	酚酸类	Phenolic acids	酚酸类	99-96-7	2	1233700	1097000	832500	1062900	919460	804000	1543600	890610	1357700	6316000	5811700	6056500	6923600	5877300	5237800	5210700	5484300	5066600	3311300	3122700	3142600	3241900
Hmgn001653	2	C7H6O3	Protocatechualdehyde	原儿茶醛	Phenolic acids	酚酸类	Phenolic acids	酚酸类	139-85-5	2	786280	703340	515870	713520	622820	464990	992400	538450	815150	3765000	3731700	3690900	4574800	3562200	3351200	3262800	3370900	3234500	2148000	1962700	2072500	1950700
pme1137	1	C6H5NO3	6-Hydroxynicotinic acid	6-羟基烟酸	Alkaloids	生物碱	Pyridine alkaloids	吡啶类生物碱	5006-66-6	2	294100	139220	237140	28009	14688	23815	15948	30135	25244	162500	99998	67693	20847	23153	14891	9	19598	13584	73654	65623	78710	55922
Zmzn002575	1	C6H5NO3	2-Nitrophenol	2-硝基苯酚	Phenolic acids	酚酸类	Phenolic acids	酚酸类	88-75-5	3	565840	609540	402720	140210	155610	125720	140960	130370	109710	343140	370080	352060	148850	123440	108520	97727	133760	132670	194810	192510	188030	188970
mws0704	2	C2H8NO4P	O-Phosphorylethanolamine	磷酸乙醇胺	Alkaloids	生物碱	Alkaloids	生物碱	1071-23-4	3	8003.7	9099.1	5379.1	9337.9	11725	15785	22122	16018	5825.7	23531	10327	35644	26599	34736	33761	37255	28927	39500	25452	23074	19892	27567
Wmzn000227	1	C6H10O4	2,2-Dimethylsuccinic acid	2,2-二甲基琥珀酸	Organic acids	有机酸	Organic acids	有机酸	597-43-3	1	127950	114860	122260	100670	119370	105110	62214	88031	72801	63744	72728	42168	76014	73474	59695	39247	35934	21031	99831	84484	71008	103370
mws0208	2	C6H10O4	Adipic Acid*	己二酸*	Organic acids	有机酸	Organic acids	有机酸	124-04-9	3	354630	419740	479400	338360	320310	348880	732420	592250	711420	658910	622870	543900	418510	529430	432220	806620	805720	707620	789610	770390	704480	762700
pme0193	1	C5H10N2O3	L-Glutamine	L-谷氨酰胺	Amino acids and derivatives	氨基酸及其衍生物	Amino acids and derivatives	氨基酸及其衍生物	56-85-9	1	28289000	30195000	25014000	20816000	24625000	20421000	3138900	5961600	4129300	25631000	26624000	26465000	21665000	20502000	16975000	2616800	3306000	3114800	20489000	23469000	21247000	22375000
pme0026	1	C6H14N2O2	L-Lysine	L-赖氨酸	Amino acids and derivatives	氨基酸及其衍生物	Amino acids and derivatives	氨基酸及其衍生物	56-87-1	3	27671000	30480000	25187000	20393000	24414000	20712000	3215500	6131600	4178600	25881000	26584000	27253000	21743000	21770000	16634000	2518300	3243400	3108600	21061000	24308000	21723000	22433000
mws1050	1	C5H9NO4	O-Acetylserine	O-乙酰丝氨酸	Amino acids and derivatives	氨基酸及其衍生物	Amino acids and derivatives	氨基酸及其衍生物	5147-00-2	3	312800	347770	308260	159020	158190	144300	172690	225960	237120	301170	328530	289490	147810	159800	188730	260570	189130	213570	234150	229730	173770	187760
Lmbn000216	2	C5H8O5	3-Methylmalic acid*	3-甲基苹果酸*	Organic acids	有机酸	Organic acids	有机酸	152204-30-3	3	128120	120290	140790	78767	98522	111460	167040	209930	200210	234480	218140	306160	171360	203960	222260	402100	230310	262930	270770	276430	250670	302010
Zmyn000247	2	C5H8O5	2-Hydroxyglutaric Acid*	2-羟基戊二酸*	Organic acids	有机酸	Organic acids	有机酸	13095-48-2	3	135610	138090	142590	80591	116090	95593	203940	202140	205470	245730	222860	286110	157290	223790	233810	426500	240200	276570	256240	272040	256600	272710
pmb2826	2	C5H8O5	L-Citramalic acid	2-甲基苹果酸	Organic acids	有机酸	Organic acids	有机酸	6236-09-5	3	56343	67344	85146	70339	81692	95924	209960	207830	260380	135330	179780	195580	138440	154210	214040	618490	373220	385360	190380	302470	247870	228650
mws2213	2	C9H8O2	Cinnamic acid	肉桂酸	Phenolic acids	酚酸类	Phenolic acids	酚酸类	140-10-3	3	2437	3013.7	3826.9	5281.6	6083.9	6013.4	11728	12662	13905	6225.6	9371.2	5723.2	10787	16515	14675	30102	16524	22890	13160	8874	8608.1	9228.9
Lmgp000796	1	C8H7NO2	4-Hydroxymandelonitrile	4-羟基扁桃腈	Alkaloids	生物碱	Phenolamine	酚胺	13093-65-7	1	3705900	3805000	4018000	1192800	1426200	1477900	1852000	3129200	3236900	3449200	2943600	2974500	1087200	1122100	963420	2226100	2254100	1839500	1977900	2033900	1828700	1746500
pme1210	1	C5H11NO2S	L-Methionine	L-甲硫氨酸	Amino acids and derivatives	氨基酸及其衍生物	Amino acids and derivatives	氨基酸及其衍生物	63-68-3	1	3418000	3521600	3664700	1174300	1312400	1393600	1684200	2847300	2950800	3089000	2582400	2620800	1044400	946280	947950	1852100	2016000	1499600	1869400	1928000	1623100	1501900
mws0847	1	C6H7N5	1-Methyladenine	1-甲基腺嘌呤	Nucleotides and derivatives	核苷酸及其衍生物	Nucleotides and derivatives	核苷酸及其衍生物	5142-22-3	2	216740	234020	222650	149240	144500	193150	98908	228560	194550	142670	125620	76205	82365	92602	60628	86640	88555	55885	141230	180850	119720	139550
Lmxn006423	2	C7H5NOS	2(3H)-Benzothiazolone	2-羟基苯并噻唑	Alkaloids	生物碱	Alkaloids	生物碱	934-34-9	2	74441	74534	88253	189190	209740	208760	194760	136040	174050	80071	67613	116680	207650	180120	162500	283030	181800	262350	138950	130090	129720	132890
pme0183	1	C5H5N5O	Isoguanine	异鸟嘌呤	Nucleotides and derivatives	核苷酸及其衍生物	Nucleotides and derivatives	核苷酸及其衍生物	3373-53-3	1	271920	330380	347240	132920	162940	140430	201800	283100	288710	453960	285510	401270	235360	164260	184200	216200	218860	172920	370620	365880	412150	388540
pme0513	2	C5H12O5	Xylitol	木糖醇	Others	其它类	Saccharides and Alcohols	糖及醇类	87-99-0	3	8594.2	4171.9	4068.6	2020.9	5808.4	13973	9399.8	10359	7050.8	14950	11559	7535.7	6487.9	9043.2	19839	19388	29409	22630	11481	9571.8	9528.7	9330
Hmlp000935	2	C8H11NO2	Vanillylamine	香兰素胺	Alkaloids	生物碱	Phenolamine	酚胺	1196-92-5	2	648190	404170	527570	893550	624400	931290	1011600	1096600	1396100	653770	874980	1277300	1462200	1099200	1617100	1260000	1593900	1040300	846390	966760	956750	826110
mws0254	1	C6H9N3O2	L-Histidine	L-组氨酸	Amino acids and derivatives	氨基酸及其衍生物	Amino acids and derivatives	氨基酸及其衍生物	71-00-1	1	11712000	10483000	9626200	6572300	9133900	7427600	2218600	5720400	3615000	6965700	6817500	6920100	6579500	5722200	5072600	1553400	1481600	1490700	7721400	10931000	9417900	9245600
pme2165	1	C5H4N2O4	Orotic acid (Vitamin B13)	乳清酸 (维生素 B13)	Others	其它类	Vitamin	维生素	65-86-1	3	1292900	927260	747110	447110	708190	519580	479140	899570	951250	172070	157330	104100	127550	117060	165830	78086	144460	105970	258040	294270	312730	321150
pmb0819	1	C10H8N2	3-Indoleacetonitrile	3-吲哚乙腈	Alkaloids	生物碱	Plumerane	吲哚类生物碱	771-51-7	3	520250	523040	524080	342720	378790	362420	84135	116620	109850	555150	480210	502680	391620	442950	385070	97885	118870	104390	506050	688360	803370	833640
Lmbn001467	1	C7H13NO3	5-Acetamidopentanoic Acid	5-乙酰氨基戊酸	Organic acids	有机酸	Organic acids	有机酸	1072-10-2	2	44785	56627	43235	36692	21381	35448	20233	17813	18405	66218	45574	60908	34018	37377	29825	21029	16893	22688	57837	55338	52484	56821
mws0005	2	C10H12N2	Tryptamine	色胺	Alkaloids	生物碱	Plumerane	吲哚类生物碱	61-54-1	1	3342000	2964700	2684500	3003800	2014200	2395400	3214800	3168800	3430800	55885000	82708000	52613000	54305000	44951000	61867000	40316000	52742000	52423000	31687000	34395000	30351000	31132000
pme3382	1	C6H11NO4	N-Acetyl-L-threonine	N-乙酰-L-苏氨酸	Amino acids and derivatives	氨基酸及其衍生物	Amino acids and derivatives	氨基酸及其衍生物	17093-74-2	3	66046	72607	67318	48456	51689	60917	55527	71495	38452	55114	37834	21543	36105	40507	17492	17190	44641	17775	69961	69194	61463	66716
mws1346	1	C6H11NO4	DL-2-Aminoadipic acid	DL-2-氨基己二酸	Alkaloids	生物碱	Alkaloids	生物碱	542-32-5	3	396790	493720	398500	570760	757440	740400	101460	131290	91155	921080	1255600	1329700	900170	969510	566140	118220	126200	105550	1292900	1362300	1210600	1189400
Lmbp000123	1	C6H13NO2S	L-Homomethionine	L-高甲硫氨酸	Amino acids and derivatives	氨基酸及其衍生物	Amino acids and derivatives	氨基酸及其衍生物	25148-30-5	1	3716200	4025600	2891000	3296800	3853000	3901300	269700	676110	235750	3525600	3459600	3627400	4520900	3398800	2443300	427450	546400	398330	2499900	3023500	2755300	2957800
Lmmn001643	2	C9H8O3	2-Hydroxycinnamic acid*	2-羟基肉桂酸*	Phenolic acids	酚酸类	Phenolic acids	酚酸类	583-17-5	2	1347000	2456600	1781600	2740400	1606800	1858200	2900300	1591800	2348400	5963900	5645500	4030000	5494800	5319700	5326100	7354800	5774100	4518000	3540100	3361500	3052000	3751100
Lmbn002648	2	C9H8O3	α-Hydroxycinnamic Acid*	α-羟基肉桂酸*	Phenolic acids	酚酸类	Phenolic acids	酚酸类	5801-57-0	3	1592500	3164500	2088600	3224000	1903300	1936600	3568300	1930900	2732100	7050800	6151400	4789700	6538800	6244800	5997000	7837200	6543900	5557800	4149100	4210300	3768200	4124400
Lmbn002739	2	C9H8O3	3-Hydroxycinnamic Acid	3-羟基肉桂酸	Phenolic acids	酚酸类	Phenolic acids	酚酸类	14755-02-3	3	1201500	2650100	1739400	2603300	1493300	1598400	2661300	1450500	2163900	5547400	5003700	3633100	4612800	4545500	5033300	5751200	5165100	4479800	3328100	3341900	2843500	3257500
MWSCX017	2	C9H8O3	4-hydroxyphenyl acrylaldehyde*	4-羟苯基丙烯醛*	Others	其它类	Others	其它	-	2	2874800	2823800	1609700	2859100	2035300	2091900	3892900	1190800	2863400	5147100	5747100	4656100	4448100	5395200	5173800	3939500	5348900	5061900	3998100	3883700	4274000	3619300
mws0159	2	C9H8O3	Phenylpyruvic acid	苯丙酮酸	Organic acids	有机酸	Organic acids	有机酸	156-06-9	2	2403000	2200400	1145900	2204200	1535300	1457500	2458400	789630	2228300	5165000	5726200	5363700	5816900	6144600	5375500	5672000	4718200	5762900	3485900	3552900	3693900	4061500
pme1439	2	C9H8O3	p-Coumaric acid	对香豆酸	Phenolic acids	酚酸类	Phenolic acids	酚酸类	501-98-4	1	8399400	8484300	4064400	8268400	5352000	5565900	9033400	2746900	7555900	17748000	21131000	18984000	18930000	21099000	17268000	19756000	20717000	20890000	13567000	12601000	13340000	12452000
pme2529	1	C6H12O5	1,5-Anhydro-D-glucitol	1,5-酐-D-山梨糖醇	Others	其它类	Saccharides and Alcohols	糖及醇类	154-58-5	3	123930	110300	115990	59847	65906	42748	76506	98057	79127	55195	50433	45168	39864	44416	36691	78156	55103	43022	72652	56486	51776	69162
mws0854	2	C6H12O5	Rhamnose	鼠李糖	Others	其它类	Saccharides and Alcohols	糖及醇类	3615-41-6	3	14478	17379	19745	15669	6924.5	11163	13387	33311	28672	25589	32957	22635	15227	16147	24854	25566	23581	17006	17105	13474	11742	20485
pme2435	1	C6H12O5	L-Fucose	L-岩藻糖	Others	其它类	Saccharides and Alcohols	糖及醇类	2438-80-4	3	56654	27827	32560	22035	23760	24113	51458	60487	48787	34274	42191	30462	16887	33022	32144	54152	45641	31429	24282	24937	37907	25049
MWS5238	2	C10H12O2	4-Phenylbutyric acid	4-苯基丁酸	Organic acids	有机酸	Organic acids	有机酸	1821-12-1	3	53815	46494	47224	73609	74095	66373	158240	234260	286770	99110	66513	60464	33394	84639	85941	151620	94703	205210	91104	87849	93879	105970
pme3083	2	C8H7NO3	2-(Formylamino)benzoic acid	2-(甲酰氨基)苯甲酸	Phenolic acids	酚酸类	Phenolic acids	酚酸类	3342-77-6	3	7311100	6566100	3372200	6696000	4338100	4085000	8224900	2163500	7287400	20727000	27408000	25091000	25198000	29338000	24498000	23506000	20553000	28081000	10827000	13703000	14750000	16976000
MWS4525	1	C6H7N5O	6-O-methylguanine	6-O-甲基鸟嘌呤	Nucleotides and derivatives	核苷酸及其衍生物	Nucleotides and derivatives	核苷酸及其衍生物	20535-83-5	1	610800	1034400	510490	1074100	932050	1249200	405100	1291800	843110	252100	99055	165400	127260	107110	124530	149450	125280	49382	422270	582680	449980	394310
pme3968	1	C6H7N5O	7-Methylguanine	7-甲基鸟嘌呤	Nucleotides and derivatives	核苷酸及其衍生物	Nucleotides and derivatives	核苷酸及其衍生物	578-76-7	3	321720	484910	283120	531090	469440	590890	217480	610110	422100	162930	69166	109900	87890	65151	87582	78783	74748	27391	234770	306340	244500	206610
pme0021	1	C9H11NO2	L-Phenylalanine	L-苯丙氨酸	Amino acids and derivatives	氨基酸及其衍生物	Amino acids and derivatives	氨基酸及其衍生物	63-91-2	1	1743700	1650500	1539300	1316700	1338800	1325200	145010	316180	220750	1489200	1520800	1511300	1207800	1174000	905170	131010	129800	94819	2027500	2126200	2063800	2025600
pmb0037	2	C10H15NO	Hordenine	大麦芽碱	Alkaloids	生物碱	Phenolamine	酚胺	539-15-1	3	19713	22331	22426	48973	31015	38547	63506	62724	76581	81762	78922	90523	118260	106530	121390	109680	137200	77972	47784	61858	42783	56739
pme0282	2	C8H6O4	Phthalic acid	邻苯二甲酸	Phenolic acids	酚酸类	Phenolic acids	酚酸类	88-99-3	3	97752	65610	71706	77357	72836	68986	54797	36852	30764	223280	202610	216990	336170	364430	369400	72704	69990	57176	220050	195320	179720	189480
pme0281	2	C8H6O4	Terephthalic acid	对苯二甲酸	Phenolic acids	酚酸类	Phenolic acids	酚酸类	100-21-0	2	982510	861070	668330	966480	871510	908500	601260	437340	446750	1982000	1848100	2048700	2921900	3245200	3365200	1029300	955030	853450	1736100	1796900	1558600	1603500
pmc0274	1	C6H6N4S	6-Methylmercaptopurine	6-甲基巯嘌呤	Nucleotides and derivatives	核苷酸及其衍生物	Nucleotides and derivatives	核苷酸及其衍生物	50-66-8	3	5031700	4789400	4317900	4051800	3928700	3855500	617930	1044600	819780	4558100	4656900	4635700	3642900	3621000	2845100	508780	489280	439090	5785200	6535300	6550600	6308700
Lmrn003000	2	C9H10O3	2-Hydroxy-3-phenylpropanoic acid	2-羟基-3-苯基丙酸	Phenolic acids	酚酸类	Phenolic acids	酚酸类	7326-19-4	3	23978	23329	14130	22617	28518	30717	39595	19591	25007	63117	67122	38516	66099	75057	64545	56585	41391	39674	32118	23273	23345	30491
mws0467	2	C9H10O3	3-(4-Hydroxyphenyl)-propionic acid	3-(4-羟基苯基)丙酸	Phenolic acids	酚酸类	Phenolic acids	酚酸类	501-97-3	2	713890	536600	397790	554030	435600	382380	669330	217250	620800	1386500	1688500	1579000	1596700	1777900	1622700	1638600	1339600	1773300	919110	972000	1049200	1070500
Zmjp000624	2	C8H9NO3	Pyridoxal	吡哆醛	Others	其它类	Vitamin	维生素	66-72-8	3	79075	71089	76922	247110	177740	289040	176720	278380	272660	70913	53165	40456	154300	161970	224980	212820	181790	165800	93193	105190	73423	77307
NK10253223	2	C8H9NO3	2-Amino-3-methoxybenzoic acid	2-氨基-3-甲氧基苯甲酸	Phenolic acids	酚酸类	Phenolic acids	酚酸类	3177-80-8	3	59944	49063	59815	180850	143290	187980	154080	253220	214230	40188	39043	33361	110950	121660	174110	176840	120790	131170	63435	74417	58535	63840
Hmtp000776	1	C8H9NO3	4,5,6-Trihydroxy-2-cyclohexen-1-ylideneacetonitrile	4,5,6-三羟基-2-环己烯-1-亚乙乙腈	Alkaloids	生物碱	Alkaloids	生物碱	-	2	1786400	1743000	1562300	1329300	1407300	1427900	214330	326700	284420	1585400	1606300	1541300	1244900	1274700	977840	167030	171990	139050	2105300	2200800	2075600	2122900
mws2125	2	C3H5O6P	Phosphoenolpyruvate	磷酸烯醇式丙酮酸	Organic acids	有机酸	Organic acids	有机酸	138-08-9	3	12919	17246	30044	242080	283440	454780	69667	38794	65274	126230	206050	185120	445100	471690	587340	144960	98475	46816	177030	165520	202580	226060
pme2598	2	C8H8O4	3,4-Dihydroxybenzeneacetic acid	3,4-二羟基苯乙酸	Phenolic acids	酚酸类	Phenolic acids	酚酸类	102-32-9	3	304810	195760	199380	260860	254590	251000	333950	312930	391210	1011700	764950	847040	722710	778110	684440	474400	834200	634030	609830	493410	495120	567990
mws0028	2	C8H8O4	Vanillic acid	香草酸	Phenolic acids	酚酸类	Phenolic acids	酚酸类	121-34-6	3	154470	127700	146900	77706	90277	99176	138540	128440	118100	425430	385990	434050	526480	441280	348430	285620	337140	317670	257470	235880	244060	259980
pme1292	2	C8H8O4	Homogentisic acid	高龙胆酸	Phenolic acids	酚酸类	Phenolic acids	酚酸类	451-13-8	3	28735	37678	44783	99654	115050	101220	85773	74028	106460	48636	89260	79713	113320	162830	92306	131830	107830	111350	47858	83161	53451	48255
MWSslk066	2	C8H8O4	3-Hydroxy-4-methoxybenzoic acid	3-羟基-4-甲氧基苯甲酸	Phenolic acids	酚酸类	Phenolic acids	酚酸类	645-08-9	3	100150	66335	94934	57163	64083	67398	93473	82862	82215	270940	309450	309150	358810	262220	235550	179210	277530	214970	137680	154920	151160	158630
pme3081	1	C8H12N2O2	4-(Aminomethyl)-5-(hydroxymethyl)-2-methylpyridin-3-ol	4-(氨甲基)-5-(羟甲基)-2-甲基吡啶-3-醇	Others	其它类	Others	其它	85-87-0	3	86486	68899	69706	46226	73294	56668	12311	21150	26101	78099	57931	75692	37081	48626	30884	4076	6897.1	11797	58438	56006	64319	80250
pme1383	1	C8H11NO3	Pyridoxine	吡哆醇	Others	其它类	Vitamin	维生素	65-23-6	1	1957400	1942900	1866900	1652300	1377900	1848200	358740	701690	649620	2538400	2781900	2030300	1394700	1613900	1540000	754300	621970	822560	1431000	1646200	1123300	1286200
Zmzn000078	2	C3H7O6P	Dihydroxyacetone phosphate	磷酸二羟基丙酮	Others	其它类	Saccharides and Alcohols	糖及醇类	57-04-5	3	18891	19837	12755	71367	61963	70167	66893	33521	45557	18932	38110	29444	77832	94512	54968	71564	66393	60258	37748	44293	44479	47190
Zmzn002460	2	C11H8O2	1-Naphthoic acid	1-萘甲酸	Organic acids	有机酸	Organic acids	有机酸	86-55-5	3	19507	11436	10386	9109.7	6533.8	7528.8	11768	10458	6511.6	14494	18059	11895	17244	14228	15060	11887	14199	12361	9192.7	8665.3	6441	12116
Lmbn003524	1	C9H16O3	9-Oxononanoic acid	9-氧代壬酸	Organic acids	有机酸	Organic acids	有机酸	2553-17-5	3	19442	33818	16631	8645.5	9870.6	60250	10659	9008.5	7302.2	39325	21597	23217	8031.2	8179.3	10456	11715	12200	12585	15312	21063	17930	12830
pme0253	1	C8H15NO3	N-Acetyl-L-leucine	N-乙酰-L-亮氨酸	Amino acids and derivatives	氨基酸及其衍生物	Amino acids and derivatives	氨基酸及其衍生物	1188-21-2	2	328340	357630	319660	191300	147870	166150	64637	69047	70660	248410	267270	296040	138870	169970	112620	55652	88394	44849	332760	316330	309620	296940
Zmyn000155	1	C7H14N2O3	N-α-Acetyl-L-ornithine	N-α-乙酰基-L-鸟氨酸	Amino acids and derivatives	氨基酸及其衍生物	Amino acids and derivatives	氨基酸及其衍生物	6205-08-9	2	1031400	1046500	1009000	816640	1140500	770440	177950	696200	353900	546780	422960	412870	622040	579530	669880	19380	38131	21349	847950	811450	839050	940260
MWSmce119	1	C6H14N4O2	L-Arginine	L-精氨酸	Amino acids and derivatives	氨基酸及其衍生物	Amino acids and derivatives	氨基酸及其衍生物	74-79-3	1	13487000	12147000	10609000	7448700	9759200	9352300	1589000	7553700	3941400	6702700	8333900	6880300	8763500	9514500	6208000	308560	487010	274750	6518600	10349000	8875600	9283300
Hmfn000531	2	C6H8O6	L-Ascorbic acid (Vitamin C)	抗坏血酸 (维生素 C)	Others	其它类	Vitamin	维生素	50-81-7	1	20166	3204.3	6786.8	2605800	3255300	3466500	2719000	1295100	3589500	1204000	4868500	3518600	9297500	9975100	9406300	5487100	5405000	5842700	2842100	2850500	2449600	1923800
mws4175	2	C6H8O6	D-Glucurono-6,3-lactone	D-葡萄糖醛酸-6,3-内酯	Others	其它类	Saccharides and Alcohols	糖及醇类	32449-92-6	2	22129	9	9	593820	682950	636900	569580	304420	621430	327540	849940	742260	1571300	1830300	1630500	1301300	1024000	1534800	542950	518660	480620	525330
MWSmce690	2	C6H8O6	Erythorbic Acid; Isoascorbic Acid	异抗坏血酸	Others	其它类	Vitamin	维生素	89-65-6	1	73289	9	9	3906800	4392000	4022700	3660500	1904300	4539300	2151300	5755700	5270300	10519000	11547000	10604000	7805300	7038200	10165000	4051100	3398400	3202600	3267700
Zmgn001448	2	C7H12O5	2-Propylmalic Acid*	2-丙基苹果酸*	Organic acids	有机酸	Organic acids	有机酸	-	1	200720	226080	191110	236610	504260	566400	243770	310520	433680	269390	196600	218910	480090	545870	1111800	944200	328830	268990	1037400	933930	942960	999910
pmb3101	2	C7H12O5	2-Isopropylmalic Acid	2-异丙基苹果酸	Organic acids	有机酸	Organic acids	有机酸	49601-06-1	1	223560	252210	190410	300070	595440	617400	249530	384490	466300	247820	258620	269590	573570	595200	1221500	1072600	334190	281820	1182500	1055300	1026300	1097300
Lmbn001754	2	C7H12O5	3-Isopropylmalic Acid*	3-异丙基苹果酸*	Organic acids	有机酸	Organic acids	有机酸	921-28-8	1	221790	204930	197080	266830	494640	607170	243730	325770	404420	263320	226670	244280	527800	515680	1070000	1004400	336770	263950	1031700	865360	861650	942480
pme2024	2	C10H12N2O	Serotonin*	五羟色胺*	Alkaloids	生物碱	Plumerane	吲哚类生物碱	50-67-9	3	105520	82383	54385	106040	25896	33723	79138	95507	76882	1507100	2188100	1116100	1571000	867480	1477800	1015300	1399900	1062900	760580	842380	689620	658020
pmb0774	2	C10H12N2O	N-Hydroxytryptamine*	N-羟基色胺*	Alkaloids	生物碱	Plumerane	吲哚类生物碱	-	3	36805	20778	24160	31037	18641	37057	22374	48907	29319	642930	726740	432060	510360	294390	461570	398740	463440	320230	237770	319270	214150	155220
mws1013	1	C9H6O4	Esculetin	秦皮乙素	Lignans and Coumarins	木脂素和香豆素	Coumarins	香豆素	305-01-1	1	8037300	7167400	5284900	8032600	6623700	4289800	9021900	6006900	9255500	3200500	3296100	2904200	2897300	3210600	3189900	4597200	2847100	1858900	8684200	7667800	5717800	8470600
mws0875	2	C5H10N2O3S	L-Cysteinyl-L-glycine	L-半胱氨酰-L-甘氨酸	Amino acids and derivatives	氨基酸及其衍生物	Amino acids and derivatives	氨基酸及其衍生物	19246-18-5	3	8078.7	9508.8	5143.1	57740	58708	106410	18579	14108	5579	15888	38060	10694	53014	147170	73991	84150	23440	73913	24694	30338	29550	23063
MWSmce220	2	C6H10O6	D-Glucono-1,5-lactone	D-葡萄糖酸-1,5-内酯	Organic acids	有机酸	Organic acids	有机酸	90-80-2	3	102690	81244	94799	154350	177150	157850	174110	212080	250230	134650	161180	142070	192910	202700	234210	274650	233290	226560	181480	131120	137660	127950
mws1195	2	C10H10O3	p-Coumaric acid methyl ester*	对香豆酸甲酯*	Phenolic acids	酚酸类	Phenolic acids	酚酸类	3943-97-3	3	48243	154110	105930	240320	117200	119500	294020	150640	229420	528320	382310	203400	348350	452300	545230	764570	518190	436610	258070	240110	219390	269050
Jmzn006005	2	C10H10O3	3,4-Methylenedioxy cinnamyl alcohol	3,4-亚甲二氧肉桂醇	Lignans and Coumarins	木脂素和香豆素	Lignans	木脂素	58095-76-4	1	111160	285680	216560	417110	229400	254650	493560	237930	372470	900960	642320	380130	678610	787250	910030	1301700	812680	768710	474170	442790	480440	469820
mws1200	2	C10H10O3	Trans-4-Hydroxycinnamic Acid Methyl Ester	反式-4-羟基肉桂酸甲酯	Phenolic acids	酚酸类	Phenolic acids	酚酸类	19367-38-5	1	66955	174580	126430	265310	141690	172450	315670	152590	250950	552790	402440	223710	392370	461780	582050	857170	522230	478530	294810	283340	289590	286370
pmb2795	2	C10H10O3	4-Methoxycinnamic acid*	4-甲氧基肉桂酸*	Phenolic acids	酚酸类	Phenolic acids	酚酸类	830-09-1	3	40284	95108	69235	151490	81993	96126	190590	93010	138840	308670	217070	129650	240190	267430	305600	456270	287150	267150	165870	171800	163660	164790
mws2212	1	C9H8O4	Caffeic acid	咖啡酸	Phenolic acids	酚酸类	Phenolic acids	酚酸类	331-39-5	1	1847500	5868500	7995100	4816800	6891100	7510800	6669500	7242200	4422700	894810	654680	680320	574690	601160	737780	1051300	757210	704700	2983400	1870600	2600100	2821100
pmf0138	2	C6H12O6	D-Mannose*	甘露糖*	Others	其它类	Saccharides and Alcohols	糖及醇类	3458-28-4	3	108260	106020	64397	30612	43571	41687	32721	22316	40029	110220	92740	143770	57397	40389	80649	182720	43083	61497	56673	56030	44105	62286
mws4170	2	C6H12O6	D-Glucose*	D-葡萄糖*	Others	其它类	Saccharides and Alcohols	糖及醇类	50-99-7	3	73475	69424	53608	19322	26507	39208	40440	36121	76059	75143	65347	64397	51057	54585	77049	168420	73989	65605	59056	46230	39897	47330
Hmcp009963	2	C11H18NO+	Candicine	N-甲基大麦芽碱	Alkaloids	生物碱	Phenolamine	酚胺	6656-13-9	2	358300	369710	345130	809070	738810	689740	871320	815810	649950	459780	259060	423200	814020	681220	638820	1079200	810320	904440	587180	573820	514500	522670
mws0250	1	C9H11NO3	L-Tyrosine	L-酪氨酸	Amino acids and derivatives	氨基酸及其衍生物	Amino acids and derivatives	氨基酸及其衍生物	60-18-4	1	1410300	1397600	1211200	1207900	1107800	1156500	260800	494750	386260	1502200	1338400	1386500	1339500	1102900	974550	348280	332430	272610	1537400	1708500	1431600	1430000
MWStz070	1	C9H11NO3	N-(2-Hydroxy-4-methoxyphenyl)acetamide	N-(2-羟基-4-甲氧基苯基)乙酰胺	Alkaloids	生物碱	Phenolamine	酚胺	58469-06-0	1	5228500	5079700	4742800	4436200	4137900	4238500	1039500	1880000	1480400	5546800	5188200	4995700	4753500	4370900	3543200	1202200	1253000	969780	5858700	6492000	5620200	5268500
Zmsp000878	1	C9H11NO3	4-Hydroxy-5-(2-oxo-1-pyrrolidinyl)benzoic acid	4-羟基-5-(2-氧-1-吡咯烷基)苯甲酸	Alkaloids	生物碱	Pyrrole alkaloids	吡咯类生物碱	-	1	20573000	19062000	19191000	18449000	17995000	17675000	4510300	7690200	6696000	20380000	21150000	19362000	18170000	17044000	15443000	4722000	5517000	4274100	22863000	24423000	20667000	19880000
MWSmce455	2	C9H10O4	Vanillic acid methyl ester	香草酸甲酯	Phenolic acids	酚酸类	Phenolic acids	酚酸类	3943-74-6	3	7434.7	8403.6	10666	5896	9437.7	7019.9	9262.4	13820	11061	24544	26266	20718	20851	16104	12130	15831	13552	23037	11897	20063	13106	17382
pmb1754	2	C5H15NO4P+	O-Phosphocholine	O-磷酸胆碱	Alkaloids	生物碱	Alkaloids	生物碱	107-73-3	3	398530	591690	330740	666060	420620	496670	290210	260240	199560	530920	710270	1198600	1032800	795850	829550	486380	460660	466100	473570	747590	522190	518110
Zmgn000447	2	C3H7O7P	3-Phospho-D-glyceric acid	3-磷酸-D-甘油酸	Others	其它类	Saccharides and Alcohols	糖及醇类	820-11-1	3	46778	49710	59740	384620	393990	624660	77949	77866	92030	184660	230440	341240	659130	731670	979290	308480	138020	69622	255130	278570	237230	268020
Hmmp001310	1	C11H9NO2	3-Indoleacrylic acid	3-吲哚丙烯酸	Alkaloids	生物碱	Plumerane	吲哚类生物碱	1204-06-4	1	17988000	13696000	15230000	11543000	13234000	11326000	2352400	3670300	3318000	15847000	14053000	15396000	11576000	12751000	11137000	2549700	2389400	2146600	16804000	20957000	19363000	16560000
Hmgp002327	1	C11H9O2N	3-amino-2-naphthoic acid	3-氨基-2-萘甲酸	Alkaloids	生物碱	Alkaloids	生物碱	-	1	20596000	17438000	17684000	13793000	15606000	12996000	2177300	3628300	2915800	18373000	16789000	18131000	13628000	14672000	12841000	2252100	2056700	1789200	20848000	24270000	22278000	19430000
pmn001492	1	C11H8O3	Ayapin	泽兰内酯	Lignans and Coumarins	木脂素和香豆素	Coumarins	香豆素	494-56-4	1	157600	188020	203300	19185	25753	86568	40452	35128	34539	611000	357540	359010	49266	37092	61310	47305	34505	55544	122530	106600	94575	107460
pme0137	1	C7H12N2O4	N-Acetyl-L-Glutamine	N-乙酰-L-谷氨酰胺	Amino acids and derivatives	氨基酸及其衍生物	Amino acids and derivatives	氨基酸及其衍生物	2490-97-3	3	35264	27670	40562	18074	25123	15966	9949.5	28044	12504	20019	9520.5	24733	15453	20449	6436.8	11142	21893	11484	25804	30199	30392	17132
mws0237	1	C9H16O4	Azelaic acid	壬二酸	Organic acids	有机酸	Organic acids	有机酸	123-99-9	1	3151300	3570200	4010400	436620	573040	1787800	870040	784700	698270	12014000	6618700	7324800	938240	858310	1437600	955000	731970	1126200	2367500	2323500	2052100	2113300
mws5041	1	C8H16N2O3	L-Glycyl-L-isoleucine*	L-甘氨酰-L-异亮氨酸*	Amino acids and derivatives	氨基酸及其衍生物	Amino acids and derivatives	氨基酸及其衍生物	19461-38-2	1	5512100	6012300	5026800	1070000	1079800	1086000	1045000	1676900	1532300	5417400	3321500	3630700	605480	791220	736890	759720	774330	765660	1854700	2178300	1929200	1775400
pme0122	1	C8H16N2O3	N6-Acetyl-L-lysine	N6-乙酰-L-赖氨酸	Amino acids and derivatives	氨基酸及其衍生物	Amino acids and derivatives	氨基酸及其衍生物	692-04-6	3	133550	179370	162770	95836	104390	138830	89815	84443	79167	294430	221220	2090900	146120	246320	158820	105440	85096	91419	174300	241040	246590	211110
mws0736	1	C8H16N2O3	N-Glycyl-L-leucine*	N-甘氨酰-L-亮氨酸*	Amino acids and derivatives	氨基酸及其衍生物	Amino acids and derivatives	氨基酸及其衍生物	869-19-2	1	6041800	6663300	5581100	1042700	1206900	1213200	1202500	1880400	1732600	6381800	3564400	4218000	685360	940560	946360	884390	888740	860820	2027600	2202800	2023400	2001500
Zmjp000182	1	C7H16N4O2	N-Monomethyl-L-arginine	N-单甲基-L-精氨酸	Amino acids and derivatives	氨基酸及其衍生物	Amino acids and derivatives	氨基酸及其衍生物	17035-90-4	1	665260	476590	457480	271270	423050	412880	170970	303710	228060	296870	239120	290190	404180	298810	255960	69476	86131	73762	365370	322220	351170	300530
pme3388	1	C7H16N4O2	Homoarginine	高精氨酸	Amino acids and derivatives	氨基酸及其衍生物	Amino acids and derivatives	氨基酸及其衍生物	156-86-5	2	232950	193050	159450	121480	181570	141390	60013	134600	96586	132400	110000	160190	163300	161510	96964	48943	47112	39941	106270	188090	207400	193660
pmf0348	1	C10H20O3	2,6-Dimethyl-7-octene-2,3,6-triol	2,6-二甲基-7-辛烯-2,3,6-三醇	Others	其它类	Saccharides and Alcohols	糖及醇类	73815-21-1	3	368800	414070	501210	56121	42480	211380	115400	89275	80065	1498300	850610	897610	106340	78186	145370	117270	74995	127810	274180	260020	226940	284100
pme0075	1	C7H11NO5	N-Acetyl-L-glutamic acid	N-乙酰-L-谷氨酸	Amino acids and derivatives	氨基酸及其衍生物	Amino acids and derivatives	氨基酸及其衍生物	1188-37-0	2	748550	717230	698280	1044000	1160900	1125100	540480	741650	593820	483320	387580	311120	748220	990430	643580	279180	408130	270300	694000	637490	664340	597310
pme2244	1	C11H11NO2	3-Indolepropionic acid	3-吲哚丙酸	Alkaloids	生物碱	Plumerane	吲哚类生物碱	830-96-6	2	92765	62188	48159	39380	80627	66692	15033	38119	13418	68765	88671	66655	74950	69307	55027	34321	22326	27902	81626	92696	77382	78804
pme0278	2	C7H14N2O4	2,6-Diaminooimelic acid	2,6-二氨基庚二酸	Organic acids	有机酸	Organic acids	有机酸	583-93-7	2	199320	244780	223610	170320	221790	179430	78995	154660	138790	842900	527640	582820	697140	457430	336490	84032	112920	84270	540370	771530	561350	557970
MWSslk140	1	C7H13NO3S	N-Acetyl-L-Methionine	N-乙酰-L-蛋氨酸	Amino acids and derivatives	氨基酸及其衍生物	Amino acids and derivatives	氨基酸及其衍生物	65-82-7	3	361690	332310	310190	87111	139970	123210	74731	113670	118050	323640	262060	270460	131900	138620	113800	60635	57520	57388	132170	149950	125810	111060
mws0281	2	C6H8O7	Citric Acid	柠檬酸	Organic acids	有机酸	Organic acids	有机酸	77-92-9	1	11626000	11470000	12305000	8036400	7839800	9653500	13649000	23027000	17409000	9135100	6963900	7833200	10549000	11189000	12305000	20020000	9457200	10040000	21703000	22979000	18601000	20260000
pme2993	2	C10H8O4	Scopoletin (7-Hydroxy-5-methoxycoumarin)	东莨菪内酯	Lignans and Coumarins	木脂素和香豆素	Coumarins	香豆素	92-61-5	2	262320	128480	176240	115430	125570	111540	194680	101260	145000	332730	387370	311480	379060	207560	252220	183230	253330	267560	186700	229920	188590	280170
MWSmce658	1	C10H8O4	Noreugenin; 5,7-Dihydroxy-2-Methylchromone	去甲丁香色原酮; 5,7-二羟基-2-甲基色酮	Phenolic acids	酚酸类	Phenolic acids	酚酸类	1013-69-0	3	13663	10080	9286.5	11239	13455	9449.1	9248	14772	7429.7	4383.4	4835.2	2590.2	2493.9	2594.5	1508.5	1605.5	2548.3	5318.3	9583	10630	8727.4	7959.5
pme2743	2	C10H11NO3	N-Phenylacetylglycine	N-苯乙酰甘氨酸	Amino acids and derivatives	氨基酸及其衍生物	Amino acids and derivatives	氨基酸及其衍生物	500-98-1	3	17546	22978	14420	17870	4946.1	18929	8232	20038	4995.8	43380	27805	41775	47764	37497	69587	11524	39896	22311	26618	37192	46956	30534
mws1189	1	C6H10O7	D-Galacturonic acid*	D-半乳糖醛酸*	Others	其它类	Saccharides and Alcohols	糖及醇类	685-73-4	3	27272	29724	26058	19246	9867.5	11609	7869.7	11700	15186	24259	27944	24202	14395	11817	10416	7567.6	12029	5263.9	20759	25593	16624	17277
pme3705	1	C6H10O7	D-Glucoronic acid*	D-葡萄糖醛酸*	Others	其它类	Saccharides and Alcohols	糖及醇类	6556-12-3	3	21445	28511	28989	8919.2	9046.8	17260	17012	22131	10384	29057	21539	13767	16883	10011	12982	11779	11623	8935.4	21422	28849	16206	15846
MWSmce632	1	C10H10O4	Vanillin acetate	香兰素乙酸酯	Phenolic acids	酚酸类	Phenolic acids	酚酸类	881-68-5	3	1230600	1091400	1349100	47425	58113	59775	52975	110920	90287	1962900	1266600	1391800	10544	50424	62340	59818	20421	46533	501890	491490	473330	547320
Lmdn003756	1	C10H10O4	Methyl caffeate	咖啡酸甲酯	Phenolic acids	酚酸类	Phenolic acids	酚酸类	3843-74-1	3	20927	6563.9	14884	8543	10674	6833.5	3842.6	6413.8	4788.4	17510	16114	12882	17160	15400	9577.8	8160.8	8178.4	15789	15868	16668	13678	17632
pme0534	1	C6H12O7	Gluconic acid	葡萄糖酸	Others	其它类	Saccharides and Alcohols	糖及醇类	526-95-4	2	148990	138140	161290	61674	52707	65655	55106	74621	67447	112190	87313	89887	83394	69756	72167	49847	62823	50237	86495	64804	61270	83053
MWSslk006	2	C10H12O4	Ethyl Vanillate	香草酸乙酯	Phenolic acids	酚酸类	Phenolic acids	酚酸类	617-05-0	3	1949.2	1583.5	1260.5	146890	164050	182600	145880	209260	218850	2755.6	20765	4703.9	44434	117100	145100	204130	74622	112050	122440	131330	131820	117110
Zmzn000079	2	C4H9O7P	D-Erythrose-4-phosphate	D-赤藓糖-4-磷酸	Others	其它类	Saccharides and Alcohols	糖及醇类	585-18-2	3	24513	23519	26825	18503	28323	25883	23243	25075	11696	37063	57504	44555	44925	69022	45529	43736	35043	30100	30351	26422	23895	32172
pmb2640	2	C12H24O2	Dodecanoic acid (Lauric acid)	十二烷酸(月桂酸)	Lipids	脂质	Free fatty acids	游离脂肪酸	143-07-7	1	315650	257800	258710	307840	310440	562230	342390	302170	297920	1187000	906180	706060	337410	257320	659860	522880	325210	459610	408810	382280	375140	365790
pmb0130	2	C12H14N2O	Acetryptine	乙酰色胺	Alkaloids	生物碱	Plumerane	吲哚类生物碱	3551-18-6	3	876.34	9615.1	19879	13100	6211.8	8236.6	17405	8146.3	5691.8	182530	715240	1299400	874380	120710	24701	10302	10984	15361	110070	108610	115590	111330
NK10251888	1	C8H18N4O2	NG,NG-Dimethyl-L-arginine	NG,NG-二甲基-L-精氨酸	Amino acids and derivatives	氨基酸及其衍生物	Amino acids and derivatives	氨基酸及其衍生物	30315-93-6	1	364950	365710	233610	184370	262540	184690	130740	146730	156740	367710	248840	330010	307400	255500	206890	191340	165180	109720	341990	306120	274360	351690
MWS5164	1	C8H18N4O2	N,N'-Dimethylarginine;SDMA	N,N'-二甲基精氨酸	Amino acids and derivatives	氨基酸及其衍生物	Amino acids and derivatives	氨基酸及其衍生物	30344-00-4	1	324400	317640	305650	214950	304780	205130	139980	216750	166000	332420	268300	343630	335250	273220	192970	128070	170510	124470	293290	361130	288530	310670
Zmbp002538	1	C11H12N2O2	1-Methoxy-indole-3-acetamide	1-甲氧基-吲哚-3-乙酰胺	Alkaloids	生物碱	Plumerane	吲哚类生物碱	-	1	1685500	1415100	1420300	1142400	1316300	1197600	305480	414370	359470	1444300	1375300	1431900	1179800	1224900	1162000	269990	267630	249730	1713700	1944400	1790000	1583900
mws0282	1	C11H12N2O2	L-Tryptophan	L-色氨酸	Amino acids and derivatives	氨基酸及其衍生物	Amino acids and derivatives	氨基酸及其衍生物	73-22-3	1	18576000	18164000	18170000	13159000	15683000	14364000	3853000	5369900	4256700	16298000	15383000	17242000	14235000	15307000	13592000	4097800	3552700	3602500	23132000	20414000	18484000	22291000
pmb0818	1	C11H11NO3	Methoxyindoleacetic acid	甲氧基吲哚乙酸	Alkaloids	生物碱	Plumerane	吲哚类生物碱	3471-31-6	3	4109600	3466600	3631700	2882600	3098800	2901100	602170	960510	845460	3686100	3458500	3621700	2991300	3052400	2759100	673530	673770	566400	4415200	4824400	4092300	3921500
mws4173	1	C11H10O4	5,7-Dimethoxycoumarin (Limettin)(Citropten)	5,7-二甲氧基香豆素 (柠檬内酯)(柠檬油素)	Lignans and Coumarins	木脂素和香豆素	Coumarins	香豆素	487-06-9	3	149190	69825	145870	54156	102140	117590	43444	91427	43195	20657	19830	13930	4310.5	17552	3224.1	2072.9	7877.5	7321	50615	47131	44722	45003
Zmgn002106	1	C11H13NO3	N-Acetyl-L-phenylalanine	N-乙酰-L-苯丙氨酸	Amino acids and derivatives	氨基酸及其衍生物	Amino acids and derivatives	氨基酸及其衍生物	2018-61-3	1	861590	627160	815810	581700	739740	750360	849350	747710	451950	766510	566580	482180	935380	368590	370370	273120	345720	325020	1272100	1327800	1207600	1286800
pmb2620	2	C11H12O4	3,4-Dimethoxycinnamic acid	3,4-二甲氧基肉桂酸	Phenolic acids	酚酸类	Phenolic acids	酚酸类	14737-89-4	1	88000	87393	123900	134740	138600	144300	322660	219420	302950	133950	149530	139590	176480	251150	294790	595430	363310	363820	190170	192610	193460	227870
MWSmce083	2	C11H12O4	Ferulic acid methyl ester	阿魏酸甲酯	Phenolic acids	酚酸类	Phenolic acids	酚酸类	2309-07-1	1	180130	174450	238180	296660	241590	285550	619540	434110	569970	287210	293280	247590	320600	462640	598750	1109600	650080	661710	368140	336320	373580	410020
MWSmce644	2	C11H12O4	4-Acetoxy-3-Ethoxybenzaldehyde	4-乙酰氧基-3-乙氧基苯甲醛	Others	其它类	Others	其它	72207-94-4	3	15095	20117	26480	40906	55079	82203	19937	45327	44648	36645	42981	38664	37472	58929	81407	96083	13008	40768	133910	143070	135310	141470
pme0170	1	C8H16N4O3	N-Acetyl-L-Arginine	N-乙酰-L-精氨酸	Amino acids and derivatives	氨基酸及其衍生物	Amino acids and derivatives	氨基酸及其衍生物	155-84-0	3	72224	54400	56478	42630	48182	42911	27644	58952	49026	29532	29694	21960	18173	18499	16363	23142	15920	13829	63253	65975	59000	54281
MWS1900	1	C11H20O4	Undecanedioic acid	十一烷二酸	Lipids	脂质	Free fatty acids	游离脂肪酸	1852-04-6	1	42478	59637	48462	30783	25671	35952	31287	39646	33433	102630	66255	65784	35035	34516	33436	36335	33678	34950	86324	72588	82579	80939
mws5045	2	C12H24O3	12-Hydroxydodecanoic acid	12-羟基十二酸	Lipids	脂质	Free fatty acids	游离脂肪酸	505-95-3	3	3017.5	2134.6	1850.4	3112.8	3945.4	3527.5	6289.9	8014.7	10784	3242.6	1361.3	1765.8	2819.3	3353.9	7193.3	11065	4504.1	10963	9514.4	5487.4	3334.8	6210.2
pme1228	1	C11H12N2O3	5-Hydroxy-L-tryptophan	5-羟基-L-色氨酸	Amino acids and derivatives	氨基酸及其衍生物	Amino acids and derivatives	氨基酸及其衍生物	56-69-9	3	152350	133590	104760	86727	72598	91613	80455	87461	91458	93054	85934	42069	61109	63636	53401	28271	51498	43558	81257	108130	95271	62095
mws1639	2	C11H10O5	Isofraxidin	异嗪皮啶	Lignans and Coumarins	木脂素和香豆素	Coumarins	香豆素	486-21-5	3	8126.4	7089	6504.8	9284.7	5307.3	4016.3	4060.8	7651.3	7978.9	13461	14520	19834	23840	6931.5	9735	1646.3	7122.7	6177.7	12362	16721	11692	11467
MWS4296	1	C11H14N2O3	Glycylphenylalanine	甘氨酰苯基丙氨酸	Amino acids and derivatives	氨基酸及其衍生物	Amino acids and derivatives	氨基酸及其衍生物	3321-03-7	1	7806600	7043300	7253300	1546700	1815900	1551400	1845600	2388200	2233700	9077000	5688800	6683300	1370900	1448100	1500800	1355300	1474900	1474500	2921100	3086300	2961400	3024900
mws5042	1	C11H14N2O3	L-Glycyl-L-phenylalanine	L-甘氨酰-L-苯丙氨酸	Amino acids and derivatives	氨基酸及其衍生物	Amino acids and derivatives	氨基酸及其衍生物	721-66-4	1	7840700	7699800	7164400	1494100	1817900	1488800	1829500	2497800	2256500	9157800	5579600	6799400	1340500	1397700	1518400	1342600	1459100	1371500	2923000	3210800	3078700	2960000
mws4085	2	C11H12O5	Sinapic acid	芥子酸	Phenolic acids	酚酸类	Phenolic acids	酚酸类	530-59-6	3	32743	16258	20944	21725	18678	13112	23349	14029	16766	85841	61060	67000	28547	27656	25442	30334	25191	29310	21884	27535	25162	29609
MWSmce538	2	C11H14O5	3,4,5-Trimethoxybenzoic acid methyl ester	3,4,5-三甲氧基苯甲酸甲酯	Phenolic acids	酚酸类	Phenolic acids	酚酸类	1916-07-0	3	3864.9	1075.4	2756	1420.9	1284.8	2417.2	2959.1	2312.3	2779.9	19053	15172	16227	19859	16402	15238	9853.7	12608	12188	12425	8980.8	8448.9	9861
Lmdp002381	2	C11H14O5	Genipin	京尼平	Terpenoids	萜类	Monoterpenoids	倍萜	6902-77-8	2	125670	94899	95065	100400	111960	77050	88363	90375	85825	880470	837590	700830	656080	471800	401880	586460	576050	424580	323990	376840	324190	287640
Lmqp003432	2	C13H22O3	6,9-Dihydroxy-7-megastigmen-3-one	6,9-二羟基-7-巨豆烯-3-酮	Terpenoids	萜类	Sesquiterpenoids	倍半萜	-	2	145120	98874	119610	111240	134330	92785	89719	117970	103290	491400	466640	361270	429620	292290	234490	364130	328560	236560	210350	203400	198610	184410
pme1194	2	C9H13N3O4	2'-Deoxycytidine	2'-脱氧胞苷	Nucleotides and derivatives	核苷酸及其衍生物	Nucleotides and derivatives	核苷酸及其衍生物	951-77-9	3	27871	66084	26267	23036	27065	58400	49769	72766	67115	190160	50300	189600	130100	32428	31380	70519	69643	66726	77641	86366	74228	79715
Lmhp001461	1	C11H20N2O3	L-Prolyl-L-Leucine	L-脯氨酰-L-亮氨酸	Amino acids and derivatives	氨基酸及其衍生物	Amino acids and derivatives	氨基酸及其衍生物	52899-07-7	2	2966000	3206600	2802400	325550	336540	327640	385880	534560	642920	3459500	1978000	2630800	317860	403300	363970	296850	299400	358980	1085700	1022000	1163700	1223400
mws0474	1	C12H22O4	Dodecanedioic aicd	十二烷二酸	Lipids	脂质	Free fatty acids	游离脂肪酸	693-23-2	1	7492.6	8942.7	11241	1787	2520.1	2248.8	3918.2	3552.6	3577.7	9460.5	10503	10667	1882.9	1681.7	2208.4	2445.4	1572.8	1304.4	3574.7	4295.1	3604.8	1577.6
Lmhp001670	1	C11H22N2O3	L-Valyl-L-Leucine	L-缬氨酰-L-亮氨酸	Amino acids and derivatives	氨基酸及其衍生物	Amino acids and derivatives	氨基酸及其衍生物	3989-97-7	2	14926000	15001000	15397000	1267200	1956900	1304900	1192600	2461700	2940000	18201000	9718800	12291000	1176600	1586000	1540000	975490	1081300	1036400	3933500	3963400	3931800	3588900
MWSmce591	2	C15H22O2	Curcumenol	莪术烯醇	Terpenoids	萜类	Sesquiterpenoids	倍半萜	19431-84-6	3	18328	16619	23659	40123	36340	32279	50206	39509	28960	26087	13054	26651	58270	51542	40983	63161	51874	54159	34352	39139	27908	22452
mws4176	1	C12H16N2O3	L-Alanyl-L-Phenylalanine	L-丙氨酰-L-苯丙氨酸	Amino acids and derivatives	氨基酸及其衍生物	Amino acids and derivatives	氨基酸及其衍生物	3061-90-3	2	1480100	1362500	1439000	240610	314000	225050	261410	326400	317640	2104600	1257000	1554900	209260	203630	279270	92955	138930	156410	476920	542770	433570	530400
Lmhn003240	2	C11H10O6	Benzoylmalic acid	苯甲酰苹果酸	Phenolic acids	酚酸类	Phenolic acids	酚酸类	22138-51-8	1	2539700	3050400	2724300	2595300	2777100	2643000	2617600	3969000	2561800	8164700	6665600	5629500	6694200	6760000	6096100	5973500	7148000	5404900	4629500	4803900	4449200	4757900
Zmdn011161	1	C15H12O3	Chrysophanol-9-anthrone	大黄酚-9-蒽酮	Quinones	醌类	Anthraquinone	蒽醌	491-58-7	2	302550	208460	150910	146340	86059	116110	131540	219950	128690	126820	77944	209830	9	9	205350	218490	130700	133330	142720	182850	191820	131960
MWS0552	2	C15H28O2	Cis-10-Pentadecenoic Acid(C15: 1)	顺-10-十五碳烯酸	Lipids	脂质	Free fatty acids	游离脂肪酸	84743-29-3	2	279690	286850	294790	196070	211630	224480	211960	336660	221600	332440	239600	424180	1023000	560090	739740	409230	275170	170830	232730	189210	183180	232490
MWS2430	1	C15H30O2	13-methylmyristic acid	13-甲基十四烷酸	Lipids	脂质	Free fatty acids	游离脂肪酸	2485-71-4	3	97279	51602	98428	70310	114980	105940	55165	66171	85962	200170	115290	122000	46749	44199	80106	64857	69362	72040	77256	73698	84027	64347
pme3732	1	C9H13N3O5	Cytidine	胞苷	Nucleotides and derivatives	核苷酸及其衍生物	Nucleotides and derivatives	核苷酸及其衍生物	65-46-3	3	1249600	2067200	1498200	267120	398680	324350	668940	851490	1025900	1907800	1085000	1835300	263950	332850	321240	617480	502700	640100	1327600	1375100	1271000	1371400
ML10180524	1	C9H13N3O5	Cytarabine	胞嘧啶阿拉伯糖苷	Nucleotides and derivatives	核苷酸及其衍生物	Nucleotides and derivatives	核苷酸及其衍生物	147-94-4	3	4699200	6323100	4695700	1140000	1097200	1201700	1588300	2407600	2670900	5847000	4044400	5409300	1200200	1162600	1323600	1767900	1674000	1675100	4449300	4614800	3720100	4144100
mws0976	1	C9H12N2O6	β-Pseudouridine	β-假尿苷	Nucleotides and derivatives	核苷酸及其衍生物	Nucleotides and derivatives	核苷酸及其衍生物	1445-07-4	3	208210	233210	164050	73162	98197	96311	78017	98040	85643	196570	137320	166340	62768	43316	42173	49696	75019	49223	100660	79501	130410	121400
mws0248	1	C9H12N2O6	Uridine	尿嘧啶核苷	Nucleotides and derivatives	核苷酸及其衍生物	Nucleotides and derivatives	核苷酸及其衍生物	58-96-8	1	1301700	1683500	1440900	349910	416070	359070	722890	957880	803610	1541400	1007200	1422800	206120	266870	412020	291080	426700	259310	554840	612380	678940	790570
MWSmce295	1	C9H12N2O6	1-beta-D-Arabinofuranosyluracil	1-β-D-阿糖呋喃脲嘧啶	Nucleotides and derivatives	核苷酸及其衍生物	Nucleotides and derivatives	核苷酸及其衍生物	3083-77-0	3	543710	741030	346570	107470	98692	117200	279960	393460	366960	697750	475360	763330	118190	137930	253480	309010	226150	358980	356270	335640	369030	353210
Lmmn005696	2	C15H16O3	Desoxyhemigossypol	脱氧半棉酚	Phenolic acids	酚酸类	Phenolic acids	酚酸类	57765-65-8	3	12177	12883	11020	26439	19115	22219	21808	15713	18189	12852	11908	16122	31119	24914	19051	30127	23993	30533	21515	19144	19321	21973
Lmhp002031	1	C12H24N2O3	L-Leucyl-L-Leucine	L-亮氨酰-L-亮氨酸	Amino acids and derivatives	氨基酸及其衍生物	Amino acids and derivatives	氨基酸及其衍生物	3303-31-9	1	3401000	2471200	2044400	791530	872140	756660	912010	921760	977170	4536000	2354100	3390300	850860	930240	902990	674740	674900	756010	1149000	925660	1125300	1102200
pme3961	1	C10H13N5O3	2'-Deoxyadenosine	2'-脱氧腺苷	Nucleotides and derivatives	核苷酸及其衍生物	Nucleotides and derivatives	核苷酸及其衍生物	958-09-8	1	2418100	2477800	2574600	639310	512380	603210	1177000	1714400	1568700	2638200	1851000	2244400	471080	496270	594230	1048200	787800	698580	1987000	2230200	2210100	1836900
MWSmce116	2	C10H13N5O3	5'-Deoxyadenosine	5-脱氧腺嘌呤核苷	Nucleotides and derivatives	核苷酸及其衍生物	Nucleotides and derivatives	核苷酸及其衍生物	4754-39-6	2	266410	264550	308840	272050	272390	352680	531750	643340	761650	170660	192200	209340	229610	261340	286150	726950	696530	602850	311660	255600	301830	335460
pme2776	1	C10H12N4O4	2'-Deoxyinosine	2-脱氧肌苷	Nucleotides and derivatives	核苷酸及其衍生物	Nucleotides and derivatives	核苷酸及其衍生物	890-38-0	3	210090	231740	219410	63562	55920	49777	100180	143180	147920	238030	170800	198790	41827	48062	56601	74759	58213	81689	182630	210740	185620	173450
Lmhn003373	2	C11H10O7	4-Hydroxybenzoylmalic acid	4-羟基苯甲酰苹果酸	Phenolic acids	酚酸类	Phenolic acids	酚酸类	-	3	129560	161830	124430	147120	132040	145620	218580	190560	157170	704160	429410	491710	401560	545310	493650	470620	578620	469410	337050	410530	394790	421060
mws0361	1	C16H30O2	Palmitoleic Acid	棕榈油酸	Lipids	脂质	Free fatty acids	游离脂肪酸	373-49-9	1	25314	17394	22511	16122	29545	16206	16051	20472	29745	67750	21840	59368	11898	10807	19899	14881	23499	16940	21176	20954	16990	19310
Zmdn006929	2	C15H12O4	Aloe-Emodin-9-Anthrone	芦荟大黄素-9-蒽酮	Quinones	醌类	Anthraquinone	蒽醌	6247-99-0	2	4414.7	5785.4	5805.5	2351.9	2076.8	3778.5	14377	28046	13713	26963	31967	22935	24504	24264	8279.4	55886	39426	41047	25428	25556	25168	30748
MWSHY0124	2	C15H12O4	Pinocembrin (Dihydrochrysin)	乔松素	Flavonoids	黄酮	Flavanones	二氢黄酮	480-39-7	3	8683.8	8170.8	8748.6	2041.3	3841.5	6200.4	23851	49083	25719	44727	54565	34862	41056	39538	13027	102470	65563	73629	45804	48045	46684	45899
pma3101	1	C11H14NO6+	Nicotinate D-ribonucleoside	烟酸核糖核苷	Others	其它类	Vitamin	维生素	17720-18-2	3	1234500	1559600	1340300	359690	430850	465720	447900	575490	635050	1757400	1026800	1171500	472700	601190	529850	712270	498560	558270	906060	932480	852290	875410
mws0120	1	C8H20NO6P	Choline Alfoscerate	甘磷酸胆碱 GPC	Lipids	脂质	PC	磷脂酰胆碱	28319-77-9	2	83410	184370	187660	21463	16836	31780	44918	29532	15621	261000	205790	180580	108280	64153	89940	162150	87157	119180	253680	252870	213870	313290
pme1187	1	C10H14N2O6	5-Methyluridine	5-甲基尿苷	Nucleotides and derivatives	核苷酸及其衍生物	Nucleotides and derivatives	核苷酸及其衍生物	1463-10-1	1	19998	25526	20548	17295	24917	23594	13520	8946.9	8976.5	21382	33796	16173	11076	16134	3664.6	13890	8925.4	12506	27445	45229	31725	30424
Zmyn000110	2	C6H14NO8P	D-Glucosamine 1-phosphate	D-氨基葡萄糖-1-磷酸	Others	其它类	Saccharides and Alcohols	糖及醇类	2152-75-2	3	8721.7	9009.9	11295	6787.8	4801.9	9085.2	4576	4840.2	7264.1	15168	9370	9333.7	2653.4	8723.3	8029	16273	13194	13532	11611	11637	9314.1	11224
mws0866	2	C6H13O9P	D-Glucose 6-phosphate*	D-葡萄糖-6-磷酸*	Others	其它类	Saccharides and Alcohols	糖及醇类	56-73-5	3	244950	306620	400850	810850	796570	950230	353190	401290	384350	583290	753110	748800	1116500	1528700	1176900	594280	381540	258980	642200	613530	657160	666500
mws1090	2	C6H13O9P	Glucose-1-phosphate*	葡萄糖-1-磷酸*	Others	其它类	Saccharides and Alcohols	糖及醇类	59-56-3	3	247750	302970	343680	710240	766820	920810	330260	376920	381110	510590	660720	711140	1122500	1368200	1133600	602550	368650	245150	548930	531320	585750	576100
MWS2442	2	C6H13O9P	D-Fructose 6-Phosphate	D-果糖-6-磷酸	Others	其它类	Saccharides and Alcohols	糖及醇类	643-13-0	3	172910	222620	254510	502480	582970	650400	221610	268160	273570	388260	477290	497490	738610	935090	827710	433920	258340	187640	415570	392100	417450	407950
Zmdp002216	1	C11H20N2O5	L-γ-Glutamyl-L-leucine	L-γ-谷氨酰胺-L-亮氨酸	Amino acids and derivatives	氨基酸及其衍生物	Amino acids and derivatives	氨基酸及其衍生物	2566-39-4	1	524450	473920	412840	266150	269980	249990	158490	256620	199100	376970	168350	319600	246730	147220	109450	81068	119190	64562	560810	625700	527580	514630
mws0715	2	C13H16N2O4	Phenylacetyl-L-glutamine	N-苯乙酰基-L-谷氨酰胺	Amino acids and derivatives	氨基酸及其衍生物	Amino acids and derivatives	氨基酸及其衍生物	28047-15-6	3	9	9	18440	9	9	9	9	9	4878.5	21479	9	13030	18746	11347	14547	9	22746	8574.5	46877	41468	33539	58523
pmb0952	1	C12H17N4OS+	Thiamine (Vitamin B1)	硫胺素 (维生素 B1)	Others	其它类	Vitamin	维生素	70-16-6	3	260070	311810	221480	91701	124510	107780	22975	54840	77437	150190	79542	194830	29278	87781	40970	17662	28675	15703	86937	97468	93770	108000
pme1184	2	C10H13N5O4	2'-Deoxyguanosine	2'-脱氧鸟苷	Nucleotides and derivatives	核苷酸及其衍生物	Nucleotides and derivatives	核苷酸及其衍生物	961-07-9	3	319470	346020	343630	245130	191550	237800	547320	874300	676810	547010	306980	638740	228080	219090	262920	713830	620130	558100	724040	773840	733530	730040
pme0230	1	C10H13N5O4	Adenosine	腺苷	Nucleotides and derivatives	核苷酸及其衍生物	Nucleotides and derivatives	核苷酸及其衍生物	58-61-7	1	8020800	10892000	7996900	2006400	1960300	2080500	2279900	3261100	3587700	7600900	7455400	8359100	1206900	1288400	2050600	1585400	1364900	1685200	3626700	4179900	3977300	3933300
pme2890	1	C8H16N2O4S2	L-Homocystine	L-高胱氨酸	Amino acids and derivatives	氨基酸及其衍生物	Amino acids and derivatives	氨基酸及其衍生物	626-72-2	2	82654	88624	84504	7815.7	15428	12997	23913	45533	37184	142250	73983	135600	8375.8	25089	16301	22524	14553	14600	61519	85419	62196	41228
pme1119	1	C10H12N4O5	Inosine	肌苷	Nucleotides and derivatives	核苷酸及其衍生物	Nucleotides and derivatives	核苷酸及其衍生物	58-63-9	3	98534	277480	138590	152870	266360	154030	53500	110070	66194	335670	120490	557880	199520	241370	390500	96229	39163	53362	281900	202050	211870	231200
mws1060	2	C10H12N4O5	9-(Arabinosyl)hypoxanthine	9-(阿拉伯糖基)次黄嘌呤	Nucleotides and derivatives	核苷酸及其衍生物	Nucleotides and derivatives	核苷酸及其衍生物	7013-16-3	3	413380	1011400	411390	1494400	2322000	1707700	170490	244010	306070	2523200	600190	4012400	1829900	1822900	2956200	333140	155890	198510	924060	909630	961050	984980
mws0383	1	C17H32O2	10-Heptadecenoic Acid	10-十七碳烯酸	Lipids	脂质	Free fatty acids	游离脂肪酸	29743-97-3	2	208740	259960	227060	101670	145170	110560	78449	118160	134000	445340	149520	312840	66311	69784	110440	134760	98440	87391	192050	172310	183880	177520
pme0376	1	C15H12O5	Naringenin (5,7,4'-Trihydroxyflavanone)	柚皮素	Flavonoids	黄酮	Flavanones	二氢黄酮	480-41-1	3	14011	17521	10665	4345	8448.3	7599.1	2999.6	4573.4	5221.2	9611.2	3275.3	14589	12030	5142.7	3966.4	2932.3	3149.2	5485.4	7258.3	5033.1	6216.9	5197.7
MWSmce675	2	C12H16O7	Arbutin	熊果苷	Phenolic acids	酚酸类	Phenolic acids	酚酸类	497-76-7	1	419740	452100	399290	414380	318530	398480	416620	395470	520610	780030	800270	737540	738480	862960	750580	735200	786370	695400	398220	401920	404950	426440
Lmmn003323	1	C16H32O3	2-Hydroxyhexadecanoic acid	2-羟基十六烷酸	Organic acids	有机酸	Organic acids	有机酸	764-67-0	1	246230	546260	278690	148930	165900	201160	218340	341620	285140	493040	331250	328990	197080	163990	225660	232430	221560	245970	1066400	1055300	1015000	924210
pme1201	2	C15H14O5	Phloretin	根皮素	Flavonoids	黄酮	Chalcones	查耳酮	60-82-2	3	6830.2	14195	7150.8	6196.5	4406.4	5857.3	11721	9246.3	17019	7781.1	5292.7	5906.1	7032.4	6187.9	7051.6	21387	14651	23994	8040	13172	11551	12524
pmb1574	1	C18H28O2	9,12-Octadecadien-6-Ynoic Acid	十八碳二烯-6-炔酸	Lipids	脂质	Free fatty acids	游离脂肪酸	61481-29-6	3	846630	620460	1444900	14402	16199	12738	17054	68808	11511	1416100	677070	651900	15689	11514	16001	20230	6093.6	14909	306220	268010	304370	302190
mws1038	2	C11H22N2O4S	Pantetheine	泛酰巯基乙胺	Others	其它类	Others	其它	496-65-1	3	14705	14161	7522.4	28651	22937	29184	9188.5	5204.7	20573	43963	48161	44020	53759	57596	58171	73849	46557	58596	45538	43205	37823	52931
mws5035	1	C15H22N2O3	L-Leucyl-L-phenylalanine	L-亮氨酰-L-苯丙氨酸	Amino acids and derivatives	氨基酸及其衍生物	Amino acids and derivatives	氨基酸及其衍生物	56217-82-4	2	1854100	1450300	1546100	927640	1107900	834400	875610	1048700	989620	2548200	1559900	1970200	916140	809620	855540	610560	697420	782900	999690	1069500	998710	1002300
pmb0889	1	C18H30O2	Punicic acid (9Z,11E,13Z-octadecatrienoic acid)	石榴酸 (9Z,11E,13Z-十八碳三烯酸)	Lipids	脂质	Free fatty acids	游离脂肪酸	544-72-9	1	2898500	3139500	3178300	273560	229100	426660	206680	595910	270170	11987000	9027600	9499200	387950	311760	469980	827860	388910	415590	2759900	2793000	2767800	2725600
Lmbn005923	1	C18H30O2	Crepenynic acid	顺式十八碳-9-烯-12-炔酸	Lipids	脂质	Free fatty acids	游离脂肪酸	2277-31-8	1	452850	586530	511480	227170	254090	216720	256130	335080	301900	491540	395790	404920	223870	195670	225590	292260	207690	136630	301810	304650	285780	287600
mws0366	1	C18H30O2	γ-Linolenic Acid*	γ-亚麻酸*	Lipids	脂质	Free fatty acids	游离脂肪酸	506-26-3	1	36669000	44242000	39947000	18388000	21964000	18849000	22206000	27054000	26186000	37867000	30905000	32556000	18434000	16380000	18285000	24245000	17228000	12246000	25395000	24044000	23306000	23601000
mws0367	1	C18H30O2	α-Linolenic Acid*	α-亚麻酸*	Lipids	脂质	Free fatty acids	游离脂肪酸	463-40-1	1	36144000	43792000	38631000	17646000	21196000	18175000	21466000	26692000	24869000	36967000	30692000	31318000	18013000	16139000	17788000	23347000	16557000	11932000	24699000	23634000	23002000	22520000
Lmhn002926	2	C13H12O7	p-Coumaroylmalic acid	对香豆酰苹果酸	Phenolic acids	酚酸类	Phenolic acids	酚酸类	-	1	2034200	1876100	1043100	1885300	1359500	1263400	1937000	560940	1807800	3557700	3767000	3780200	3831800	3607800	3427200	3830800	3524900	3091400	2943000	2815700	2677500	2734600
mws0629	1	C13H16N2O5	L-Aspartyl-L-Phenylalanine	L-天冬氨酰-L-苯丙氨酸	Amino acids and derivatives	氨基酸及其衍生物	Amino acids and derivatives	氨基酸及其衍生物	13433-09-5	1	486980	639030	522220	40357	106140	62603	84139	124880	141180	599730	359230	348950	39695	61289	77937	64481	35166	83427	279310	329860	284950	369840
mws1491	1	C18H32O2	Linoleic acid	亚油酸	Lipids	脂质	Free fatty acids	游离脂肪酸	60-33-3	1	47652000	51715000	52189000	15453000	24224000	21344000	17960000	31123000	24468000	50062000	39311000	40352000	19858000	21289000	22932000	26493000	21054000	15682000	30663000	30888000	29150000	31186000
Lmbn006152	1	C18H32O2	(9Z,11E)-Octadecadienoic acid	(9Z,11E)-十八碳二烯酸	Lipids	脂质	Free fatty acids	游离脂肪酸	2540-56-9	1	24221	28594	28755	8182.7	10735	10682	11400	14898	11181	25929	20684	20634	11669	9678.1	10197	13250	11811	7781.5	13438	15872	16475	14653
MWS4354	1	C11H15N5O4	N6-methyladenosine	N6-甲基腺苷	Nucleotides and derivatives	核苷酸及其衍生物	Nucleotides and derivatives	核苷酸及其衍生物	1867-73-8	1	267180	360570	215760	129950	117240	115260	108460	168870	180430	230490	161690	140060	130290	105730	122350	81846	93284	98286	285600	326330	305000	275160
Hmhp001812	1	C11H15N5O4	2'-O-Methyladenosine	2-甲氧基腺苷	Nucleotides and derivatives	核苷酸及其衍生物	Nucleotides and derivatives	核苷酸及其衍生物	2140-79-6	1	1246300	2068000	1224200	789850	1012600	1032800	618320	766350	718760	1621400	1415900	1123700	753870	537090	344280	589040	799040	685110	3601700	3952900	3616800	3815900
mws0396	1	C18H34O2	Elaidic Acid	反油酸	Lipids	脂质	Free fatty acids	游离脂肪酸	112-79-8	1	10352000	23348000	13631000	2676700	3302000	4506700	3246400	5285800	4460000	19140000	8055100	18211000	2749100	2706600	6537700	13913000	3351500	4342300	9295100	8462700	7428900	8009000
mws2623	1	C18H34O2	11-Octadecanoic acid(Vaccenic acid)	11-十八碳烯酸	Lipids	脂质	Free fatty acids	游离脂肪酸	506-17-2	1	2474400	6357800	3254800	669100	749370	1118300	729860	1144400	1021900	4994100	1969900	4846900	645220	604300	1528900	3256400	770290	1017700	2222000	2101200	1774700	1765400
pme1178	1	C10H13N5O5	Guanosine	鸟苷	Nucleotides and derivatives	核苷酸及其衍生物	Nucleotides and derivatives	核苷酸及其衍生物	118-00-3	1	46398000	64927000	46514000	15983000	14743000	15544000	20453000	33254000	31221000	49715000	36195000	44703000	10767000	10569000	16034000	15576000	16489000	17389000	38659000	42804000	37987000	37267000
Hmqp002567	2	C17H17NO3	4-Hydroxycinnamic acid p-hydroxyphenethylamine	4-羟基桂皮酸酰对羟基苯乙胺	Phenolic acids	酚酸类	Phenolic acids	酚酸类	-	1	3486.2	3461.8	3453.4	1310.3	1431.8	2020.7	20937	171360	10768	409490	929450	595870	1335500	728850	108020	5722.3	21331	17826	181220	166150	166590	177220
MWSmce089	2	C17H17NO3	p-Coumaroyltyramine	对香豆酰酪胺	Alkaloids	生物碱	Phenolamine	酚胺	36417-86-4	1	9	9	9	9	9	9	22548	181590	13740	450110	1006800	613130	1327200	763720	94285	6196.2	18087	17597	178260	194560	166480	183760
Zmzp005934	2	C18H37NO	Stearamide	硬脂酰胺	Alkaloids	生物碱	Alkaloids	生物碱	124-26-5	1	9137.3	8761.8	16424	4623.6	8110.5	22371	8103.8	7054.1	6800.1	41265	27174	25067	8705.1	10434	48876	17478	11523	13135	15225	16452	13345	13255
mws0051	2	C16H12O5	Acacetin	金合欢素	Flavonoids	黄酮	Flavones	黄酮	480-44-4	1	429800	364270	330780	217500	250730	412600	917450	1333600	291390	4411000	5467500	7228000	6107700	4017100	1927900	1113200	1426600	1149700	2516700	2627000	2545100	2473300
mws0668	2	C10H12N4O6	Xanthosine	黄苷	Nucleotides and derivatives	核苷酸及其衍生物	Nucleotides and derivatives	核苷酸及其衍生物	146-80-5	1	989220	973020	1053900	4106000	4419400	5009200	1561400	1441800	1593000	1983600	1778200	1731300	5733100	5934100	4774600	1589700	2169800	1977800	2995300	2710700	2857300	2818300
mws1068	2	C15H10O6	Kaempferol (3,5,7,4'-Tetrahydroxyflavone)	山奈酚	Flavonoids	黄酮	Flavonols	黄酮醇	520-18-3	1	82858	131170	146780	125410	122030	109870	169060	143960	158960	1085600	1158800	789070	903440	684600	507220	876370	758190	492930	265420	259650	298070	311340
NK10256198	2	C15H10O6	3,5,7,2'-Tetrahydroxyflavone; Datiscetin	3,5,7,2'-四羟基黄酮; 橡精	Flavonoids	黄酮	Flavones	黄酮	480-15-9	1	78083	122140	132850	109840	109220	105650	139250	118870	142180	1003200	999950	703060	783960	561230	417570	761390	623860	422120	230490	237460	246210	265670
Lmbp006165	2	C17H18O4	6,7-cis-Dihydroxy-2-(2-phenylethyl)-5,6,7,8-tetrahydrochromone	6,7-顺二羟基-2-(2-苯乙基)-5,6,7,8-四氢色酮	Others	其它类	Others	其它	-	3	40158	52553	37626	54734	43731	56189	93837	71543	74838	204990	336890	344280	226260	498790	337100	380380	449790	207850	116340	124390	98663	114220
MWSslk132	1	C16H30O4	Hexadecanedioic acid	十六烷基二酸	Lipids	脂质	Free fatty acids	游离脂肪酸	505-54-4	1	76800	81663	82694	27954	33566	38129	32826	37282	35563	111530	91531	77990	52791	39268	33688	38174	39421	36531	58355	57348	59603	61572
Jmgn005927	2	C15H12O6	2-hydroxynaringenin	2-羟基柚皮素	Flavonoids	黄酮	Flavanones	二氢黄酮	-	3	6314.4	5307.8	6247.2	4368.4	3893	2632.9	4397.7	4943.1	7467.2	24396	17440	19835	7125.8	5936.8	7047.7	33029	21739	24247	13163	9303.5	10211	9427.8
pme3163	2	C7H15O10P	D-Sedoheptuiose 7-phosphate	D-景天庚酮糖 7-磷酸	Others	其它类	Saccharides and Alcohols	糖及醇类	2646-35-7	3	606180	547850	542830	455190	549980	456970	354160	520380	333670	1093500	901070	1232200	1047800	1193000	1042800	1194500	835250	859790	559190	542300	532400	550400
pmb2657	2	C10H18N4O6	Argininosuccinic acid	精氨基琥珀酸	Organic acids	有机酸	Organic acids	有机酸	2387-71-5	3	53864	52308	53253	57948	67736	88483	46068	47476	57326	85968	77796	85246	119430	108150	168760	51601	36649	31754	79514	75478	80320	79055
pmb0885	1	C18H26O3	4-Oxo-9Z,11Z,13E,15E-Octadecatetraenoic Acid	4-氧化-9Z,11Z,13E,15E-十八碳四烯酸	Lipids	脂质	Free fatty acids	游离脂肪酸	-	3	233630	220300	219630	111370	98901	105240	111620	142230	120350	146840	101400	99835	48575	67286	66806	70330	71672	75120	108550	91492	83201	88789
Zmyn004548	1	C18H28O3	12-Oxo-phytodienoic acid	12-氧-植物二烯酸	Lipids	脂质	Free fatty acids	游离脂肪酸	85551-10-6	3	9119.6	10603	11819	2633.7	3630.8	3448.5	4908	8023.4	4602.7	8909.3	5769.4	6854.1	2136.7	3205.6	2538.5	4140.9	2885.9	1951.8	8867.8	7140.7	6074.6	6294.7
Zmyn004732	1	C18H30O3	2R-hydroxy-9Z,12Z,15Z-octadecatrienoic acid	2R-羟基-9Z,12Z,15Z-十八碳三烯酸	Lipids	脂质	Free fatty acids	游离脂肪酸	-	2	26226	54834	41249	2439.2	1483.7	23394	3744.3	7097.4	4156.7	109730	63818	80732	7485	5152.7	24190	19546	5952.1	16922	34634	37022	32850	30949
Lmbn005443	1	C18H30O3	13-KODE; (9Z,11E)-13-Oxooctadeca-9,11-dienoic acid*	13-氧代十八碳-9,11-二烯酸*	Lipids	脂质	Free fatty acids	游离脂肪酸	54739-30-9	3	21289	24498	33826	6453.4	9837.7	7894.6	9987.2	14944	10407	52003	26382	43437	5091.7	8300.5	7144.1	34467	4161.9	5470.8	15918	14933	15936	16025
pmb2787	1	C18H30O3	9-Oxo-10E,12Z-octadecadienoic acid	9-过氧-10E,12Z-十八碳二烯酸	Lipids	脂质	Free fatty acids	游离脂肪酸	54232-59-6	3	50155	53051	65269	12308	7470.3	8313.7	11522	19687	19055	148340	74315	74338	4629.1	11447	11093	33307	7797.4	6984	35670	33163	40643	32235
Zmpn003368	2	C18H30O3	13S-Hydroxy-9Z,11E,15Z-octadecatrienoic acid	13S-羟基-9Z,11E,15Z-十八碳三烯酸	Lipids	脂质	Free fatty acids	游离脂肪酸	87984-82-5	1	195750	171170	283350	623740	673320	782860	599010	714050	743310	515620	311350	276260	338460	408790	796590	954870	390240	401570	608360	590190	632540	597880
Zmyn004676	1	C18H30O3	17-Hydroxylinolenic acid	17-羟基亚麻酸	Lipids	脂质	Free fatty acids	游离脂肪酸	-	1	779400	849220	794340	49273	64700	112870	61871	277710	116130	2568500	1896200	1722700	113940	65204	107500	130400	61826	105370	499800	501550	507340	519420
pmb2786	1	C18H30O3	9-Hydroxy-10,12,15-octadecatrienoic acid*	9-羟基-10,12,15-十八碳三烯酸*	Lipids	脂质	Free fatty acids	游离脂肪酸	89886-42-0	1	25847	25719	31599	6393.3	9728.4	6627.6	8188.5	13003	14241	53352	26838	49032	4439.7	8743.5	7255.4	33513	4648.1	4649.9	15142	15500	15014	16330
Zmbp003483	1	C14H17NO6	Indican	靛苷	Alkaloids	生物碱	Plumerane	吲哚类生物碱	487-60-5	3	524820	491850	284130	357740	442780	283010	491950	389320	479070	146130	181690	187040	151890	204150	122600	287280	156820	180660	614250	528580	464870	564020
Hmqp005411	1	C18H32O3	9-Oxo-12Z-Octadecenoic acid*	9-氧代-12Z-十八碳烯酸*	Lipids	脂质	Free fatty acids	游离脂肪酸	112543-32-5	2	38053	94056	113300	5415.9	7762.5	55491	20818	46763	16887	251810	79275	152010	15946	11675	102370	133070	4808.1	60344	55057	64012	56132	48695
Hmqp005455	1	C18H32O3	15(R)-Hydroxylinoleic Acid*	15(R)-羟基亚油酸*	Lipids	脂质	Free fatty acids	游离脂肪酸	177931-23-6	3	27961	70147	80149	6586.5	6383.3	49856	13587	34954	13220	184530	59018	112930	9418.1	12200	79072	96759	11314	43513	46028	42688	41301	37879
Lmbn005369	1	C18H32O3	13(S)-HODE;13(S)-Hydroxyoctadeca-9Z,11E-dienoic acid*	13-羟基十八烷基-9,11-二烯酸*	Lipids	脂质	Free fatty acids	游离脂肪酸	10219-69-9	3	1912400	1957600	2146900	95025	125080	258420	104120	315080	174370	8003400	5375200	5272000	227480	169170	258120	390290	146060	227310	1471000	1365900	1416500	1435600
Rfmb091	1	C18H32O3	9S-Hydroxy-10E,12Z-octadecadienoic acid*	9S-羟基-10E,12Z-十八碳二烯酸*	Lipids	脂质	Free fatty acids	游离脂肪酸	15514-85-9	1	1896200	1968800	2224600	92620	128790	242060	113790	321210	168470	8037900	5155000	5347700	237740	174640	268350	412600	148000	240310	1412100	1391300	1407800	1436200
Lmbn005662	1	C18H32O3	9(10)-EpOME;(9R,10S)-(12Z)-9,10-Epoxyoctadecenoic acid	9,10-环氧十八烯酸	Lipids	脂质	Free fatty acids	游离脂肪酸	16833-56-0	1	105640	109580	157780	12002	11401	32018	11245	19447	19171	421430	168070	230320	9135.8	8371.4	40886	128030	13817	24153	77702	86111	82925	74735
pmb2799	2	C18H32O3	12,13-Epoxy-9-Octadecenoic Acid	12,13-环氧-9-十八碳烯酸	Lipids	脂质	Free fatty acids	游离脂肪酸	6799-85-5	1	27063	29246	57489	6958.2	7198.2	76832	4767.2	8632.8	5993.1	153930	31798	110710	5820.1	9414.2	56351	158740	7500.6	26804	33555	31568	29364	32869
Zmyn004714	1	C18H34O3	Ricinoleic acid	蓖麻油酸	Lipids	脂质	Free fatty acids	游离脂肪酸	141-22-0	1	58793	85391	65008	7093.1	16143	30584	34288	48322	51050	71865	38413	52084	15201	17532	25861	62724	30205	32020	41410	40266	34308	38824
pmf0297	1	C20H42O	1-Eicosanol	正二十醇	Lipids	脂质	Free fatty acids	游离脂肪酸	629-96-9	3	73361	93862	70188	12947	12531	32529	36268	57670	55797	87807	38212	57801	15113	14961	28509	76275	31917	33773	47154	50893	46455	41435
Lmhn001386	2	C12H12O9	Vnilloyltartaric acid	香草酰酒石酸	Phenolic acids	酚酸类	Phenolic acids	酚酸类	-	2	14679	14846	23729	62694	64792	71863	25663	25755	30711	28258	25491	18786	57440	59974	60227	30015	36887	28031	39636	37839	30430	34623
Lmjp004941	2	C16H12O6	Rhamnocitrin (7-Methylkaempferol)*	鼠李柠檬素*	Flavonoids	黄酮	Flavonols	黄酮醇	569-92-6	3	8163.9	17139	11569	9575.5	11557	7242.7	27664	18764	26150	56044	32146	35817	45223	27128	27193	51227	44442	57133	35247	22466	32499	21827
MWSHY0126	1	C16H12O6	Kaempferide (3,5,7-Trihydroxy-4'-methoxyflavone)	山奈素	Flavonoids	黄酮	Flavonols	黄酮醇	491-54-3	2	15674	26518	16647	16914	11345	31435	22065	51708	16756	14815	4184.1	8697.5	8368.2	8419.4	9	9	5417.8	9	18309	21631	17067	16833
pmp000971	2	C16H12O6	6-Demethoxy-7-methylcapillarisin	6-去甲氧基-7-甲基茵陈色原酮	Others	其它类	Others	其它	-	2	7920.3	29079	12733	3726.1	7822.6	24083	38522	21100	15975	310870	156590	192390	357620	152430	75762	51220	94083	49262	102990	125540	119620	108640
pmp000001	2	C16H12O6	Hispidulin (5,7,4'-Trihydroxy-6-methoxyflavone)*	高车前素*	Flavonoids	黄酮	Flavones	黄酮	1447-88-7	3	9131.1	31037	21693	20078	24306	18541	70591	33798	39897	107290	63418	74244	86898	52355	49588	102330	80296	100970	51591	48873	59386	49566
pmp001127	1	C16H12O6	Chrysoeriol	金圣草黄素	Flavonoids	黄酮	Flavones	黄酮	491-71-4	3	38376	45146	36962	37996	39969	48156	97917	74841	47753	133280	38206	45298	36045	20716	9689.1	10155	42006	29741	52548	51067	54459	55543
mws0058	2	C16H12O6	Diosmetin (5,7,3'-Trihydroxy-4'-methoxyflavone)	香叶木素	Flavonoids	黄酮	Flavones	黄酮	520-34-3	3	18670	39691	29088	28449	31173	25269	69689	45972	58010	119690	76415	81272	91202	62533	69709	135320	113090	140030	62722	61141	51907	61915
Zmhn003257	2	C16H12O6	5,7,2'-Trhiyroxy-8-methoxyflavone	5,7,2'-三羟基-8-甲氧基黄酮	Flavonoids	黄酮	Flavones	黄酮	-	3	22492	43458	29612	28570	32446	24265	67050	46105	58205	105890	70646	77366	103140	60797	76571	136490	110490	145130	62716	54295	62427	57542
Zmhp002714	2	C16H12O6	5,6,7-Tetrahydroxy-8-methoxyflavone	5,6,7-三羟基-8-甲氧基黄酮	Flavonoids	黄酮	Flavones	黄酮	-	3	23258	33957	15351	10533	12369	58295	27776	34073	20312	493640	193860	294500	610870	206110	25528	44557	182230	58805	218580	226050	214700	188010
Zmhp003514	2	C16H12O6	6,7,8-Tetrahydroxy-5-methoxyflavone	6,7,8-三羟基-5-甲氧基黄酮	Flavonoids	黄酮	Flavones	黄酮	-	3	6362.8	13534	18574	14852	17560	16273	27946	23865	17111	74516	34568	21114	65531	52361	44620	67174	69788	32052	35553	15923	38250	34381
Zmhn001358	2	C13H16O8	4-O-Glucosyl-4-hydroxybenzoic acid	4-O-葡萄糖基-4-羟基苯甲酸	Phenolic acids	酚酸类	Phenolic acids	酚酸类	-	1	219790	384310	163900	869790	921020	649300	991890	585450	266560	990330	854150	1576700	1555800	1152100	656050	768630	1438600	1679000	835790	1457100	753170	935350
Lmqn008288	2	C18H36O3	3-Hydroxyoctadecanoic Acid	3-羟基十八烷酸	Lipids	脂质	Free fatty acids	游离脂肪酸	45261-96-9	2	317050	355610	265790	447320	579390	821470	447460	827700	670840	452470	321570	601570	465470	705400	444630	687900	500560	588420	435500	443190	431910	466770
mws0920	1	C15H10O7	Tricetin (5,7,3',4',5'-Pentahydroxyflavone)	五羟黄酮	Flavonoids	黄酮	Flavones	黄酮	520-31-0	2	340400	312390	295330	318580	306660	308130	331580	309900	363630	104010	121410	151930	170440	64031	4159	68875	68565	166630	267580	209410	204010	215110
Zmhn000892	1	C13H18O8	4-O-Glucosyl-3,4-dihydroxybenzyl alcohol	4-O-葡萄糖基-3,4-二羟基苄醇	Phenolic acids	酚酸类	Phenolic acids	酚酸类	-	2	602310	599490	810560	535700	895730	860450	622340	1038500	856280	123610	138820	142230	145110	165410	166960	225520	141940	200650	354540	348130	321240	362630
MWSslk208	2	C20H30O2	Kaurenoic Acid	贝壳杉烯酸	Terpenoids	萜类	Ditepenoids	二萜	6730-83-2	1	181700	194240	124840	308600	449830	604270	291100	597390	490870	217920	87307	277420	272280	522140	289400	496230	347800	346680	298630	304850	276000	253460
pme1086	2	C10H17N3O6S	Glutathione reduced form	谷胱甘肽还原型	Amino acids and derivatives	氨基酸及其衍生物	Amino acids and derivatives	氨基酸及其衍生物	70-18-8	2	25522	66410	57224	288750	316940	411920	66291	61820	52710	58813	91883	51754	158370	395940	175380	177490	74772	172210	120750	92699	93456	93376
pmn001610	1	C20H36O2	Eicosadienoic acid	二十碳二烯酸	Lipids	脂质	Free fatty acids	游离脂肪酸	5598-38-9	3	30236	30051	31169	26862	26645	22817	31025	32155	21027	11875	9896.9	9375.3	8822.5	10530	11626	8151.5	7149.8	9183.9	19776	18671	15636	17131
pmb2791	1	C18H30O4	9-Hydroperoxy-10E,12,15Z-octadecatrienoic acid	9-羟基过氧-10E,12,15Z-十八碳三烯酸	Lipids	脂质	Free fatty acids	游离脂肪酸	111004-08-1	3	37008	34098	42162	14913	20322	17996	21221	18469	17036	28490	22212	26454	22613	14112	21676	18543	13384	17161	17036	27571	28855	24893
pmb2789	2	C18H30O4	13S-Hydroperoxy-6Z,9Z,11E-octadecatrienoic acid	13-氢过氧化-6Z,9Z,11E-十八碳三烯酸	Lipids	脂质	Free fatty acids	游离脂肪酸	121107-97-9	3	591.21	1916.3	255.74	9153.5	7542.9	12091	14235	15843	22171	6884.7	2614.9	1926.9	2676.8	2600.7	6246.6	27852	5339.7	5730.7	6910	8137.1	9939.4	6882.6
Zmyn004449	1	C18H30O4	9-Hydroxy-12-oxo-10(E),15(Z)-octadecadienoic acid	9-羟基-12-氧代-10(E),15(Z)-十八碳二烯酸	Lipids	脂质	Free fatty acids	游离脂肪酸	-	2	13003	21694	48736	2654.7	3317.6	19273	6020.2	11142	4216.7	68707	16572	25915	7904.8	2973.7	15608	10329	3695.9	10610	14467	14235	14433	14883
pme3967	1	C12H17N5O5	2-(Dimethylamino)guanosine	2-(二甲基氨基)鸟苷	Nucleotides and derivatives	核苷酸及其衍生物	Nucleotides and derivatives	核苷酸及其衍生物	2140-67-2	1	911390	963010	1021800	277570	262870	290440	368470	533030	399720	930060	817030	1157300	232340	175480	150100	381980	434160	422500	983340	1034900	1066500	1077500
Lmqp002761	1	C19H20O4	Alnusonol	赤杨醇	Phenolic acids	酚酸类	Phenolic acids	酚酸类	52330-12-8	3	181340	280160	200590	167770	256110	367490	284620	336560	296370	10397	55882	50579	60446	46068	50784	71151	54234	58251	159190	177630	134860	212360
Rfmb087	1	C18H32O4	9-Hydroxy-13-oxo-10-octadecenoic Acid	9-羟基-13-氧代-10-十八碳烯酸	Lipids	脂质	Free fatty acids	游离脂肪酸	-	3	26284	66344	68199	13742	10654	49428	7404.6	23321	20286	194210	127000	124710	2481.6	7945.1	32273	22552	5940.6	29808	19532	32678	17469	22183
MWS80007	1	C18H32O4	13-Hydroperoxy-9Z,11E-octadecadienoic acid	13-过氧化羟基-9Z,11E-十八碳二烯酸	Lipids	脂质	Free fatty acids	游离脂肪酸	23017-93-8	3	79129	101130	79510	23910	36116	22152	48248	72214	57751	113310	88559	90228	79190	55881	37804	46713	56806	36947	77349	75511	67067	74191
pmb2804	1	C18H32O4	13S-Hydroperoxy-9Z,11E-octadecadienoic acid	13-氢过氧化-9,11-十八碳二烯酸	Lipids	脂质	Free fatty acids	游离脂肪酸	33964-75-9	3	73255	98212	103340	13140	6503	37469	10625	22850	16210	303030	190300	199840	13431	9337.6	19235	24603	16107	16965	90203	87163	94698	93178
pmn001689	1	C18H32O4	9-Hydroxy-12-oxo-15(Z)-octadecenoic acid	9-羟基-12-氧代-15(Z)-十八碳烯酸	Lipids	脂质	Free fatty acids	游离脂肪酸	-	1	113250	140320	118600	9199.8	10318	8637.7	12901	21581	21396	167040	68304	208180	5904.7	10108	10119	12892	6992.4	6088.9	121040	127380	116700	119800
MWS80006	1	C18H32O4	9-Hydroperoxy-9Z,11E-Octadecadienoic Acid	9-过氧化羟基-9Z,11E-十八碳二烯酸	Lipids	脂质	Free fatty acids	游离脂肪酸	5502-91-0	2	32320	52626	37958	9484.1	15706	12174	23256	28542	27641	63916	43587	43623	36451	24196	12152	24301	26464	15364	37417	34848	29980	29936
Lmbn005287	1	C18H32O4	7S,8S-DiHODE; (9Z,12Z)-(7S,8S)-Dihydroxyoctadeca-9,12-dienoic acid	7,8-二羟基-9,12-十八碳二烯酸	Lipids	脂质	Free fatty acids	游离脂肪酸	143288-65-7	3	75693	97209	77311	25876	37158	22985	46282	69738	61226	125800	87627	93905	79841	48762	36420	47563	56690	40399	79704	67220	73162	77693
MWStz221	1	C18H19NO4	N-Cis-Feruloyltyramine	N-顺式阿魏酰酪胺	Alkaloids	生物碱	Phenolamine	酚胺	80510-09-4	1	1347700	4192700	1371600	2161400	1506100	1436200	4593000	4556300	2306100	7599800	4206300	8050500	6721500	3326500	1681100	1016900	1079500	1269400	3019500	3016000	3172200	2879300
mws1433	1	C18H19NO4	N-Feruloyltyramine	N-阿魏酰酪胺	Alkaloids	生物碱	Phenolamine	酚胺	66648-43-9	1	1339000	4290900	1361500	2243300	1473500	1442200	4542000	4502700	2181900	7481000	4110800	7742500	6682400	3103600	1684700	974950	1066700	1230400	3005300	3003700	3030900	2863800
Lmbn007891	1	C18H34O4	Hydroxy ricinoleic acid	羟基蓖麻油酸	Lipids	脂质	Free fatty acids	游离脂肪酸	-	2	54151	54794	78868	4787.6	4628.6	12260	4895.2	9494.2	6178.5	229590	74894	84682	5549.1	1817.6	11629	18207	3298.6	4758.2	84885	98611	95403	94876
Zmzp006646	2	C16H12O7	Capillarisin	茵陈色原酮	Others	其它类	Others	其它	56365-38-9	1	1585500	2070100	2056600	1736200	1762600	1431000	3058300	2164600	2198600	4870200	5243800	5019900	3778300	3125500	4119100	4166800	4096900	3707000	3044000	3304700	3180000	3221100
mws0066	2	C16H12O7	Isorhamnetin	异鼠李素	Flavonoids	黄酮	Flavonols	黄酮醇	480-19-3	1	952860	1307200	1209900	1091200	1103600	1017400	1745200	1286600	1296800	2581200	3040600	2737000	2179300	1849000	2367000	2398500	2279100	2172900	1760800	1715500	1829100	1874700
pmb2871	1	C13H16O9	1-O-Gentisoyl-β-D-glucoside	1-O-龙胆酰-β-D-葡萄糖	Phenolic acids	酚酸类	Phenolic acids	酚酸类	23445-11-6	1	292700	200860	298330	156030	168750	212490	164960	333810	305240	52200	86435	39060	109130	79654	54204	72357	76108	79677	135690	92666	131130	83285
Zmtn001661	1	C14H20O8	Vanilloloside	香草醇苷	Phenolic acids	酚酸类	Phenolic acids	酚酸类	74950-96-2	2	159250	123810	145450	107510	141020	116690	129910	167810	160770	40237	59348	37153	69029	55696	21695	27187	41210	55863	87395	65094	67381	79809
Hmln006813	2	C18H20O5	4'-hydroxy-2,4,6-trimethoxydihydrochalcone	4'-羟基-2,4,6-三甲氧基二氢查耳酮	Flavonoids	黄酮	Chalcones	查耳酮	-	2	56268	73541	65237	55069	57266	59064	98014	78552	76200	157920	164340	154800	128700	98793	132640	123950	132390	129110	92207	96619	98673	111810
mws0582	2	C11H19N3O6S	S-(Methyl)glutathione	S-甲基谷胱甘肽	Amino acids and derivatives	氨基酸及其衍生物	Amino acids and derivatives	氨基酸及其衍生物	2922-56-7	1	58701	69687	65455	152290	138490	165070	89936	116500	72272	39987	76099	61223	221670	257320	163800	175690	111180	96602	136590	171040	99659	108570
MWSslk257	1	C9H14N3O8P	Cytidine 5'-monophosphate(Cytidylic acid)	胞苷-5'-单磷酸	Nucleotides and derivatives	核苷酸及其衍生物	Nucleotides and derivatives	核苷酸及其衍生物	63-37-6	2	175030	292930	129540	51473	60564	61702	102340	108280	135460	414680	402930	354950	195530	189750	107510	159260	206180	177460	203290	216570	216300	193960
pme3188	1	C9H13N2O9P	Uridine 5'-monophosphate	尿苷 5'-单磷酸	Nucleotides and derivatives	核苷酸及其衍生物	Nucleotides and derivatives	核苷酸及其衍生物	58-97-9	1	2834800	5104900	2904700	302020	424140	424220	596080	1117000	1653900	3875100	1525200	1541600	392290	499260	355530	349330	562440	324090	1604200	1625200	1434800	1774700
mws0983	1	C20H39NO2	N-Oleoylethanolamine	油酰单乙醇胺	Alkaloids	生物碱	Alkaloids	生物碱	111-58-0	1	11104	23358	15323	7717.2	5265.4	6373.8	11402	12853	11245	32580	18215	59383	10705	7237	15121	21527	17199	13587	40934	40175	37815	39254
pmn001419	2	C15H18O8	1-O-p-Coumaroyl-β-D-glucose	1-O-对香豆酰-β-D-葡萄糖	Phenolic acids	酚酸类	Phenolic acids	酚酸类	7139-64-2	1	25774000	22886000	21783000	16943000	15221000	19593000	20392000	17348000	21193000	43011000	52685000	37821000	49773000	48927000	49804000	38964000	46223000	43286000	37126000	33760000	32852000	33444000
Hmhn003067	2	C15H18O8	Phenylpropionic acid-O-β-D-glucopyranoside	苯基丙酸-O-β-D-吡喃葡萄糖苷	Phenolic acids	酚酸类	Phenolic acids	酚酸类	-	1	12437000	10430000	9827300	7562000	6580800	8534300	8600600	8123500	9469600	20419000	24883000	19470000	24000000	21901000	24367000	20174000	22342000	20908000	17672000	15741000	15421000	16887000
Lmyp002284	2	C14H17NO8	2-Hydroxy-1,4-benzoxazine-3(2H)-one glucoside (HBOA glucoside)	2-羟基-1,4-苯并噁嗪-3(2H)-酮 葡萄糖苷 (HBOA 葡萄糖苷)	Alkaloids	生物碱	Alkaloids	生物碱	27625-86-1	2	9	9	9	9	9	9	9	9	9	582530	594080	634320	961800	692140	764030	742760	864830	648920	307080	350380	291300	387600
pmn001690	2	C16H24O7	3-Hydroxy-4-isopropylbenzylalcohol-3-O-glucoside	3-羟基-4-异丙基苯甲醇-3-O-葡萄糖苷	Phenolic acids	酚酸类	Phenolic acids	酚酸类	-	3	19723	16963	21413	26847	17641	18657	33108	13091	14521	105460	131310	99550	119980	120170	123560	113460	117350	104520	64420	53059	41780	55042
pmn001691	1	C18H32O5	9,12,13-Trihydroxy-10,15-octadecadienoic acid	9,12,13-三羟基-10,15-十八碳二烯酸	Lipids	脂质	Free fatty acids	游离脂肪酸	-	1	2054800	1994400	2298900	107470	173200	152340	148820	276650	260780	3148100	2086400	2206400	37894	101450	112540	121030	54637	112010	910540	796480	835480	807780
mws0371	1	C22H32O2	Cis-4,7,10,13,16,19-Docosahexaenoic Acid	顺式-4,7,10,13,16,19-二十二碳六烯酸	Lipids	脂质	Free fatty acids	游离脂肪酸	6217-54-5	3	3056.4	1880.2	2673.3	2409.3	2566.9	2530.7	1407	2330.7	2315.4	4022.9	3168.1	3381.1	1085.4	1237.3	2007.4	2337.6	2610.6	2756.9	2676	1753	1993.3	1800
mws0884	1	C10H12N5O6P	Cyclic 3',5'-Adenylic acid	环-3',5'-腺嘌呤核苷酸	Nucleotides and derivatives	核苷酸及其衍生物	Nucleotides and derivatives	核苷酸及其衍生物	60-92-4	1	312750	409560	377670	96220	90801	92776	63242	108730	159480	396940	336990	349070	41715	52185	94750	36369	79969	47744	188610	173530	157450	187930
MWStz208	2	C18H19NO5	N-Feruloyloctopamine	N-阿魏酰章鱼胺	Alkaloids	生物碱	Phenolamine	酚胺	66648-44-0	2	205050	119460	127200	434810	451640	215760	584120	418760	408400	1380800	904510	1133500	2418400	1350400	747500	439670	640140	614620	610310	602110	699590	669830
Lmtn002565	2	C14H18O9	1-O-Vanilloyl-D-Glucose	1-O-香草酰-D-葡萄糖	Phenolic acids	酚酸类	Phenolic acids	酚酸类	-	1	181220	112690	70517	159850	131270	85426	104040	63618	80514	316350	340680	293590	323850	334240	485680	432890	323860	325820	171410	196540	184070	176580
Hmqn003054	1	C18H34O5	9,10,11-Trihydroxy-12-octadecenoic acid	9,10,11-三羟基-12-十八碳烯酸	Lipids	脂质	Free fatty acids	游离脂肪酸	61911-67-9	1	727890	743870	789920	9277.9	10322	16792	5222.3	9573	6228.2	1381800	922990	992320	13814	9321.4	15027	10842	8277.1	9031.9	322860	284550	307720	307360
pmn001694	1	C18H34O5	9,10,13-Trihydroxy-11-Octadecenoic Acid	9,10,13-三羟基-11-十八碳烯酸	Lipids	脂质	Free fatty acids	游离脂肪酸	29907-57-1	1	12439000	11995000	13010000	113410	117700	187050	71867	161440	107480	21947000	14865000	15965000	221430	140760	161140	108770	82931	139760	4858400	4749300	4819700	5085800
pmb0789	1	C14H21NO8	Pyridoxine-5'-O-glucoside	吡哆醇-5'-O-葡萄糖苷	Others	其它类	Vitamin	维生素	-	3	109650	106710	129030	141070	144710	149330	68324	113300	111470	136160	101170	83825	128460	134910	92772	47602	50617	62350	124710	162940	100130	112100
Lmyn007622	1	C18H36O5	9,10,18-Trihydroxystearic acid	9,10,18-三羟基硬脂酸	Lipids	脂质	Free fatty acids	游离脂肪酸	496-86-6	2	10406	9730	9507.1	1439.4	2203.5	1524.9	2131.8	4428.3	2987.2	16706	8411.6	13472	3618.3	4363.4	2818.1	3134.4	4118.5	9	14775	11518	19305	15452
mws0675	1	C11H15N2O8P	β-Nicotinamide mononucleotide	β-烟酰胺单核苷酸	Nucleotides and derivatives	核苷酸及其衍生物	Nucleotides and derivatives	核苷酸及其衍生物	1094-61-7	1	79119	132270	161190	19987	26269	28678	72860	94117	87295	200480	96768	138520	36293	34698	34987	20637	46634	48028	58987	74518	38975	71601
MWStz294	2	C20H20N2O3	N-Feruloyltryptamine	N-阿魏酰色胺	Alkaloids	生物碱	Plumerane	吲哚类生物碱	53905-13-8	1	12287	20168	9438	13160	21601	20148	23506	26823	17971	1386200	877830	1442600	8832200	815590	221090	58496	129560	97115	563640	592240	544290	531310
mws1015	1	C15H16O9	Esculin (6,7-DihydroxyCoumarin-6-glucoside)	秦皮甲素	Lignans and Coumarins	木脂素和香豆素	Coumarins	香豆素	531-75-9	1	1944000	1872500	2362800	2036100	2876200	2961500	2429900	3843100	3409900	278070	408150	341230	399120	497170	584290	669140	448100	542810	1261700	1174800	1375900	1335600
Cmyn001328	1	C15H16O9	Daphnin	瑞香苷	Lignans and Coumarins	木脂素和香豆素	Coumarins	香豆素	486-55-5	1	1857900	1761300	2334600	2173300	2734800	2977000	2485400	3983200	3239200	249990	399400	351330	423960	526350	544090	631760	449800	586570	1258600	1188900	1202200	1433800
Jmwn002620	2	C15H18O9	Vanillic Acid-4-O-Glucuronide	香草酸-4-O-葡萄糖醛酸苷	Phenolic acids	酚酸类	Phenolic acids	酚酸类	-	3	158330	121620	161740	379580	378650	451410	701000	651450	961760	71936	100130	84037	76012	198210	234600	425920	345590	457240	333300	307500	292560	329010
HJAP050	2	C19H21NO5	N-Feruloyl-3-methoxytyramine	N-阿魏酰-3-甲氧基酪胺	Alkaloids	生物碱	Phenolamine	酚胺	78510-19-7	1	72345	78989	52833	13598	17804	13498	128670	120480	42027	449890	104550	201830	744950	108970	37520	106250	187360	129950	190220	200400	187470	188140
mws0609	1	C10H12N5O7P	Guanosine 3',5'-cyclic monophosphate	鸟苷 3',5'-环单磷酸	Nucleotides and derivatives	核苷酸及其衍生物	Nucleotides and derivatives	核苷酸及其衍生物	7665-99-8	1	1732000	1582800	1965700	436070	318550	407170	548030	646980	647670	1948700	1106500	1039800	280930	322350	306230	824230	671440	626810	565360	558950	591000	562600
pmb0801	1	C14H19NO9	4-Pyridoxic acid-O-glucoside	4-吡哆酸-O-葡萄糖苷	Others	其它类	Vitamin	维生素	-	2	54758	38356	43191	34484	39966	26823	25071	42682	33954	31057	19882	27696	16249	14820	26761	20650	12475	17081	20992	21646	33489	14357
mws0874	1	C10H14N5O7P	3'-Adenylic Acid	3'-腺嘌呤核苷酸	Nucleotides and derivatives	核苷酸及其衍生物	Nucleotides and derivatives	核苷酸及其衍生物	84-21-9	1	74287	97302	62607	21909	40333	33098	51136	68556	64694	96708	71208	58713	5883.8	13947	30644	33464	22615	34528	37666	40677	32043	41121
mws4108	1	C21H20O5	1-Methoxyphaseollin	1-甲氧基香豆素	Lignans and Coumarins	木脂素和香豆素	Coumarins	香豆素	157226-48-7	3	68523	51078	57282	34444	45917	25751	37081	50090	38926	65059	72037	50980	29905	29430	34997	32276	27197	25746	45829	40678	39665	42629
Lmhp011562	1	C21H36O4	1-α-Linolenoyl-glycerol	1-α-亚麻酸甘油酯	Lipids	脂质	Glycerol ester	甘油酯	-	1	7207000	7599600	5002900	2359900	2716300	2014200	3800200	4734400	4908800	8545700	11818000	13291000	4184100	4302200	4198900	3565300	3915100	3698800	5231200	4673200	4670100	4651500
Lmhp011388	1	C21H36O4	2-α-Linolenoyl-glycerol	2-α-亚麻酸甘油酯	Lipids	脂质	Glycerol ester	甘油酯	55268-58-1	1	3677700	3694900	2822900	1310800	1560300	1125100	1575000	2045400	1821600	3695500	4952900	5269300	1613900	1803100	1922600	1099100	1326400	1546000	2534500	2346500	2289800	2317900
MWSmce024	1	C16H18O9	Scopoletin-7-O-glucoside (Scopolin)	东莨菪内酯-7-O-葡萄糖苷 (东莨菪苷)	Lignans and Coumarins	木脂素和香豆素	Coumarins	香豆素	531-44-2	2	115010	154590	144100	74359	121990	138990	100670	151790	128700	64477	49354	86130	139610	23741	32971	23935	37269	35910	131240	169050	192900	173740
pmb0296	1	C21H40O4	1-Oleoyl-Sn-Glycerol	单酰甘油酯(18:1)	Lipids	脂质	Glycerol ester	甘油酯	129784-87-8	3	220030	244930	266370	122310	143590	126230	139590	260270	183860	196970	144710	147770	46953	58798	78080	64724	65523	63554	167590	144140	141620	159650
mws1526	1	C16H22O9	Sweroside	獐牙菜苷	Terpenoids	萜类	Monoterpenoids	倍萜	14215-86-2	2	239890	272420	187670	277260	241830	197110	200870	241540	230090	95984	145980	114990	109080	91709	110870	114540	126200	115770	150970	117600	132480	158700
pmb3107	1	C15H20O10	Glucosyringic Acid	葡萄糖基丁香酸	Phenolic acids	酚酸类	Phenolic acids	酚酸类	-	1	21007	14997	20706	7673.2	11901	13084	20719	14199	12751	21982	17757	16843	13778	13767	13327	7076.4	10680	9039	21152	12884	18442	22100
pmb0998	1	C10H14N5O8P	Guanosine 5'-monophosphate	鸟苷 5'-单磷酸	Nucleotides and derivatives	核苷酸及其衍生物	Nucleotides and derivatives	核苷酸及其衍生物	85-32-5	2	1270700	1925800	1321300	441130	457000	465740	752660	1348400	1387400	1564800	964440	1022900	483820	368170	503190	625040	589700	576100	785300	989510	740580	709770
Lmbp002309	1	C17H22O9	Sinapaldehyde-4-O-Glucoside	芥子醛-4-O-葡萄糖苷	Phenolic acids	酚酸类	Phenolic acids	酚酸类	154461-65-1	3	25718	37566	20931	90021	69284	64185	71191	65607	85869	33851	36647	22730	32333	55258	18461	21111	37176	62063	39204	30819	38312	34817
pmn001695	1	C16H20O10	Trihydroxycinnamoylquinic acid	三羟基肉桂酰奎宁酸	Phenolic acids	酚酸类	Phenolic acids	酚酸类	-	3	101820	79473	119880	84874	86323	113470	81123	130540	101450	68108	60943	52536	60305	43462	59535	51750	49042	44473	63527	63818	82853	63110
Hmgn002833	2	C20H20O7	4-Ketopinoresinol	4-酮基松脂酚	Others	其它类	Others	其它	-	3	9635.9	13080	10030	8201.2	4653.8	8872.7	12922	17876	21493	15352	13520	17766	11079	10545	11250	40703	23430	25408	12502	14233	14608	11519
pmn001400	1	C19H20O8	2,3,5,4'-Tetrahydroxystilbene-2-O-xyloside	2,3,5,4'-四羟基二苯乙烯-2-O-木糖苷	Others	其它类	Stilbene	茋类	-	2	721050	444140	793700	269890	255800	160990	256230	397880	256000	553530	341330	286780	358040	232420	386950	321940	429500	186370	546850	545700	629980	641410
Lmzn001983	2	C16H24O10	D-Threo-guaiacylglycerol-7-O-β-D-glucoside	D-苏式-愈创木基甘油-7-O-β-D-葡萄糖苷	Phenolic acids	酚酸类	Phenolic acids	酚酸类	-	1	12578	11073	13485	13573	13648	22291	20443	11145	20427	27374	26453	25747	45730	52680	30521	55907	48455	47948	22786	23824	17021	30081
mws0232	1	C17H20N4O6	Riboflavin (Vitamin B2)	核黄素 (维生素 B2)	Others	其它类	Vitamin	维生素	83-88-5	1	3084600	2956000	3087100	1394400	1215800	1295300	1423900	2421000	1752800	2509500	1525000	1976800	581110	600420	825340	579020	611850	587160	2091500	2336700	2061300	2439600
pme1286	2	C14H20N6O5S	S-(5'-Adenosy)-L-homocysteine	S-(5-腺苷)-L-高半胱氨酸	Amino acids and derivatives	氨基酸及其衍生物	Amino acids and derivatives	氨基酸及其衍生物	979-92-0	1	473970	532990	463330	416620	382540	419700	795930	989400	929310	554300	528480	580500	359020	339130	411790	1016300	805740	773800	597570	611250	529390	496110
HJN003	2	C17H22O10	1-O-Sinapoyl-D-glucose	1-O-芥子酰-D-葡萄糖	Phenolic acids	酚酸类	Phenolic acids	酚酸类	-	3	64895	35371	42925	41446	52790	33948	36745	33172	33582	163790	109420	123260	165470	133330	121590	114690	117490	103220	47129	51328	69980	67660
pmn001423	2	C19H30O8	Roseoside	长寿花糖苷	Others	其它类	Others	其它	54835-70-0	3	8997	8019.8	10797	13523	21061	5848.6	9773	14348	7344.3	73382	54024	46708	71833	42017	15705	47885	31767	39390	15895	19586	35889	23165
mws1565	2	C17H24O10	Geniposide	京尼平苷	Terpenoids	萜类	Monoterpenoids	倍萜	24512-63-8	2	799770	612980	772510	543460	578230	572210	639190	630180	606960	7689300	8276500	7960800	8999800	4703900	5032200	7808700	6216200	4947800	3515100	3904100	3991600	3819200
MWStz103	1	C15H22N6O5S	S-(5'-Adenosyl)-L-methionine	S-(5'-腺苷基)-L-蛋氨酸	Amino acids and derivatives	氨基酸及其衍生物	Amino acids and derivatives	氨基酸及其衍生物	29908-03-0	1	238480	392560	245350	246220	201570	94766	99894	87842	147500	256220	284530	342550	136650	177200	113810	163030	160300	104820	107680	232060	183060	104140
pmc0281	1	C15H21N5O8	Ribosyladenosine	核糖腺苷	Nucleotides and derivatives	核苷酸及其衍生物	Nucleotides and derivatives	核苷酸及其衍生物	-	3	783780	461850	664400	286930	314880	361590	330720	296120	325070	889860	607730	641740	601730	572110	453300	460880	590140	476620	479440	521690	496910	497120
mws1051	1	C15H23N6O5S	S-Adenosylmethionine	S-腺苷蛋氨酸	Amino acids and derivatives	氨基酸及其衍生物	Amino acids and derivatives	氨基酸及其衍生物	485-80-3	3	245960	235580	269220	134640	103620	164500	250650	339990	258190	231760	305620	338290	108510	107540	135370	281200	234790	349940	217270	201920	194150	253490
pme3007	2	C9H14N2O12P2	Uridine 5'-diphosphate	尿苷 5'-二磷酸	Nucleotides and derivatives	核苷酸及其衍生物	Nucleotides and derivatives	核苷酸及其衍生物	27821-45-0	3	16588	17526	12873	39461	33631	40699	70589	54376	66608	25190	33721	25171	33424	39067	44662	50086	61539	44369	29177	30282	34942	42820
pmn001394	2	C20H22O9	2,3,5,4'-Tetrahydroxystilbene-2-O-glucoside	2,3,5,4'-四羟基二苯乙烯-2-O-葡萄糖苷	Others	其它类	Stilbene	茋类	82373-94-2	3	6192.4	4649.6	4853.2	7932.6	5739.2	13830	7346.2	14033	10581	11608	8630.1	10171	10664	15888	9987.6	13392	10599	4600.6	9774.4	9827.7	9233.3	12937
Lmbp003668	2	C20H18O10	Kaempferol-3-O-arabinoside	山奈酚-3-O-阿拉伯糖苷	Flavonoids	黄酮	Flavonols	黄酮醇	-	2	95780	83975	82120	61075	88922	91194	144970	75496	130590	277950	503330	360520	772810	539090	463210	930990	475070	399160	208020	226140	222190	180330
pmb0864	1	C19H40NO7P	LysoPE 14:0	溶血磷脂酰乙醇胺 14:0	Lipids	脂质	LPE	溶血磷脂酰乙醇胺	-	1	645540	729190	601140	131600	168730	159360	177070	226580	191740	698910	765990	844590	135630	130410	124830	99980	95024	128440	346740	325560	364570	329690
Lmhp008337	1	C19H40NO7P	LysoPE 14:0(2n isomer)	溶血磷脂酰乙醇胺 14:0(2n异构)	Lipids	脂质	LPE	溶血磷脂酰乙醇胺	-	1	112390	114370	89506	20614	21613	25768	29909	37328	39057	115300	135700	139920	20200	24043	19887	20501	16983	27305	52053	54330	54834	52599
pme2117	2	C10H15N5O10P2	Adenosine 5'-diphosphate	腺苷-5'-二磷酸	Nucleotides and derivatives	核苷酸及其衍生物	Nucleotides and derivatives	核苷酸及其衍生物	58-64-0	3	71989	66135	64025	257650	197510	277790	317270	293580	367310	65907	131800	122500	257250	292060	223040	299300	257460	276170	110280	130630	191540	157750
mws2118	1	C21H24O10	Phloretin-2'-O-glucoside (Phlorizin)	根皮苷	Flavonoids	黄酮	Chalcones	查耳酮	60-81-1	1	216500	206400	195160	246600	244310	222910	181410	193070	283950	56397	85976	70596	71762	85038	118050	143190	90423	149290	111760	141390	137220	122250
Lmhp008440	1	C20H40NO7P	LysoPE 15:1	溶血磷脂酰乙醇胺 15:1	Lipids	脂质	LPE	溶血磷脂酰乙醇胺	-	2	36563	39788	36577	9274.3	10846	11054	8031.4	12160	13940	57669	41507	67965	11703	7580.9	10395	5096.5	2369	7813.6	8850.4	19297	21519	23915
Lmhp009187	1	C20H42NO7P	LysoPE 15:0	溶血磷脂酰乙醇胺 15:0	Lipids	脂质	LPE	溶血磷脂酰乙醇胺	-	1	405380	389680	363750	96430	132400	94133	93509	127750	110660	453080	455720	497020	115800	99708	104660	61566	44920	51172	252820	231260	262880	243440
Lmhp008885	1	C20H42NO7P	LysoPE 15:0(2n isomer)	溶血磷脂酰乙醇胺 15:0(2n异构)	Lipids	脂质	LPE	溶血磷脂酰乙醇胺	-	1	75263	55702	53087	14842	17913	12591	22623	26932	21573	71027	59799	108900	10668	16802	16309	4956	7973.5	8647.7	31566	32846	33814	49366
pmp000573	2	C22H22O10	Acacetin-7-O-galactoside*	金合欢素-7-O-半乳糖苷*	Flavonoids	黄酮	Flavones	黄酮	-	1	101700	121600	70072	52822	58470	83503	118330	96124	81786	1608500	1076600	1877100	1844800	739220	316210	281780	644980	348530	719120	855950	869910	949660
pmp000575	2	C22H22O10	Acacetin-7-O-glucoside (Tilianin)*	金合欢素-7-O-葡萄糖苷 (煅树素)*	Flavonoids	黄酮	Flavones	黄酮	4291-60-5	1	80405	115490	80813	48110	53015	72898	103100	85337	76694	1328900	898800	1563200	1564500	654810	292020	245560	537000	317000	638240	738970	750310	766540
Lmhp007836	1	C21H38NO7P	LysoPE 16:3	溶血磷脂酰乙醇胺 16:3	Lipids	脂质	LPE	溶血磷脂酰乙醇胺	-	2	799760	598240	512510	63359	84494	71711	58628	66739	56113	898440	727670	990970	90307	71714	51235	27109	37099	39791	248020	248800	208700	211210
Hmcp002316	2	C21H20O11	Isorhamnetin-3-O-arabinoside	异鼠李素-3-O-阿拉伯糖苷	Flavonoids	黄酮	Flavonols	黄酮醇	-	3	1207800	993810	908320	1163300	1347400	1040300	1095600	721700	985560	2119100	2982800	2317300	4076600	2643300	3696500	1799000	2210100	1093100	3191400	3211100	3201000	3343300
MWS20150	2	C21H20O11	Luteolin-7-O-glucoside (Cynaroside)	木犀草素-7-O-葡萄糖苷 (木犀草苷)	Flavonoids	黄酮	Flavones	黄酮	5373-11-5	3	4576400	3788500	4997700	4686000	4691400	4702900	3795300	4468800	5583600	13228000	8303200	6759900	6777000	5371200	5676400	7517000	8085600	9830700	4975100	5405200	4811900	4589500
Lmlp003531	1	C21H20O11	Luteolin-3'-O-glucoside	木犀草素-3'-O-葡萄糖苷	Flavonoids	黄酮	Flavones	黄酮	5154-41-6	1	2336400	2616600	1961900	1705300	1585100	2160800	1953400	1592300	2362500	2380400	1644200	1580700	1070000	863820	1667600	3464500	1729000	3109400	1253700	1311500	1336400	1401800
MWSHY0136	2	C21H20O11	Kaempferol-3-O-glucoside (Astragalin)*	山奈酚-3-O-葡萄糖苷(紫云英苷)*	Flavonoids	黄酮	Flavonols	黄酮醇	480-10-4	1	2342100	2334300	2293000	1374800	2003700	2402500	2262100	1534800	2508400	3009500	1032700	1777100	1277500	1000100	1782600	3566000	1937600	3495400	1265100	1321700	1537900	1519000
mws0045	1	C21H20O11	Quercetin-3-O-rhamnoside(Quercitrin)	槲皮素-3-O-鼠李糖苷(槲皮苷)	Flavonoids	黄酮	Flavonols	黄酮醇	522-12-3	3	125960	82425	72052	103930	76974	98001	65728	84998	92943	35824	54591	27797	18661	61798	41697	56063	13053	36347	43317	55925	40226	78430
Lmyn006922	2	C22H24O10	Sakuranin	樱花苷	Flavonoids	黄酮	Flavanones	二氢黄酮	529-39-5	3	9	9	11063	9	9	8659.3	9	11406	7594	32291	12941	29107	35118	17565	9670.3	7405.2	17758	9052.8	14208	14438	12737	22136
MWSHY0165	2	C22H24O10	Isosakuranetin-7-O-glucoside (Isosakuranin)	异樱花素-7-O-葡萄糖苷 (异野樱黄苷)	Flavonoids	黄酮	Flavonols	黄酮醇	491-69-0	3	31519	31804	11019	7323.5	5619.1	22618	10420	31881	17361	185130	76875	115810	158700	65799	35393	29064	90396	22553	59297	63074	73210	74660
Lmsp004301	2	C21H22O11	3',5,5',7-Tetrahydroxyflavanone-7-O-glucoside	3',5,5',7-四羟基黄烷酮-7-O-β-D-葡萄糖苷	Flavonoids	黄酮	Flavanones	二氢黄酮	-	3	83502	142470	105730	88565	89201	109140	115570	97485	68992	416010	205620	181210	133170	109790	229930	235520	277750	358700	120380	183600	137110	119240
Lmtn002796	2	C21H22O11	Aromadendrin-7-O-glucoside	香橙素-7-O-葡萄糖苷	Flavonoids	黄酮	Flavanonols	二氢黄酮醇	28189-90-4	3	40984	36665	45015	33771	36074	40729	33120	24277	24262	88493	108250	148800	105880	96685	105350	139580	91783	131410	45903	50987	52072	72006
mws0057	2	C21H22O11	Eriodictyol-7-O-glucoside	圣草酚-7-O-葡萄糖苷	Flavonoids	黄酮	Flavanones	二氢黄酮	38965-51-4	3	69987	107480	116990	63497	66462	84253	82784	73009	59745	293710	130950	182450	128090	96741	179330	166450	254090	246090	104260	136030	83828	102760
Lmhp008763	1	C21H42NO7P	LysoPE 16:1(2n isomer)	溶血磷脂酰乙醇胺 16:1(2n异构)	Lipids	脂质	LPE	溶血磷脂酰乙醇胺	-	1	440050	383080	368310	72868	127840	108590	113260	114670	196000	690020	582570	568690	144970	109230	94242	126720	75172	115620	222190	214300	192600	195140
Lmhp009034	1	C21H42NO7P	LysoPE 16:1	溶血磷脂酰乙醇胺 16:1	Lipids	脂质	LPE	溶血磷脂酰乙醇胺	-	1	1402300	1401400	1173400	241370	367840	307910	390230	437250	379250	1334200	1437600	2360400	241240	228470	192580	189300	163490	202190	544890	507360	526320	560040
pmb0876	1	C21H44NO7P	LysoPE 16:0	溶血磷脂酰乙醇胺 16:0	Lipids	脂质	LPE	溶血磷脂酰乙醇胺	53862-35-4	1	39217000	39951000	33895000	8051400	11680000	9621000	9130800	11204000	10024000	40315000	42211000	46152000	8970100	8621800	7816400	4819500	4671600	5901600	19075000	20177000	19098000	18999000
pmd0160	1	C21H44NO7P	LysoPE 16:0(2n isomer)	溶血磷脂酰乙醇胺 16:0(2n异构)	Lipids	脂质	LPE	溶血磷脂酰乙醇胺	-	1	2252400	2157800	1653300	388170	581560	442610	537730	655020	581360	2088000	2678100	3113500	441160	456270	417190	328220	281240	341410	1028200	1107200	1162400	1242700
Lmmp003767	2	C21H18O12	Kaempferol-7-O-glucuronide	山奈酚-7-O-葡萄糖醛酸苷	Flavonoids	黄酮	Flavonols	黄酮醇	-	1	3419400	3622200	3885900	2751600	3310500	3650400	4160200	2951200	4172900	11298000	12440000	10811000	13119000	12420000	8459300	13687000	14059000	13682000	6068700	6792400	6116300	6151200
pmp000579	2	C22H22O11	Diosmetin-7-O-galactoside*	香叶木素-7-O-半乳糖苷*	Flavonoids	黄酮	Flavones	黄酮	-	3	378890	362190	383040	305830	333810	368650	397660	323430	431230	980830	705860	924240	888740	456730	585650	738250	691220	1138800	573160	556880	743870	546680
Lmsn005122	2	C22H22O11	1-O-Galloyl-6-O-Cinnamoyl-β-D-glucose	1-O-没食子酰-6-O-肉桂酰-β-D-葡萄糖	Phenolic acids	酚酸类	Phenolic acids	酚酸类	115746-69-5	3	59474	72374	74147	66875	53571	60626	67087	50087	61665	173430	154380	170550	197010	164760	111510	171240	193610	204950	121880	117620	88340	114700
Hmmp004965	2	C22H22O11	Diosmetin-7-O-glucoside*	香叶木素-7-O-葡萄糖苷*	Flavonoids	黄酮	Flavones	黄酮	20126-59-4	3	358500	337600	396180	305740	336130	332650	441770	369250	487760	1020300	608270	864990	927070	547010	527090	831450	665150	1140700	474710	676910	599380	569410
Hmcp002539	2	C22H22O11	Isorhamnetin-3-O-rhamnoside	异鼠李素-3-O-鼠李糖苷	Flavonoids	黄酮	Flavonols	黄酮醇	-	3	27715	14251	8544.7	14580	33250	25530	96299	12179	29123	131970	197330	241760	532570	313780	277490	269720	402350	80495	144390	144250	130500	139480
Lmsn005333	2	C22H22O11	4-O-Galloyl-1-O-Cinnamoyl-β-D-glucose	4-O-没食子酰-1-O-肉桂酰-β-D-葡萄糖	Phenolic acids	酚酸类	Phenolic acids	酚酸类	-	3	58579	77392	69362	50074	47882	67212	58180	37662	65564	204670	182610	145840	215920	164160	126510	221480	184830	147110	111670	115360	97280	104180
mws1329	1	C21H20O12	Quercetin-7-O-glucoside*	槲皮素-7-O-葡萄糖苷*	Flavonoids	黄酮	Flavonols	黄酮醇	491-50-9	1	2592400	2977900	2712200	2494600	2433000	3456600	2092600	2639500	2115100	263450	216380	281310	283180	201060	229610	155980	167550	155060	1364200	1384000	1334700	1451200
MWSHY0046	1	C21H20O12	Quercetin-3-O-glucoside (Isoquercitrin)*	槲皮素-3-O-葡萄糖苷(异槲皮苷)*	Flavonoids	黄酮	Flavonols	黄酮醇	482-35-9	1	3297800	3352700	2652100	3234000	3593000	3650000	2601200	2691200	3137800	551820	698930	723980	639640	675410	583590	538190	577720	567370	1730800	1484800	1506000	1523100
mws0856	1	C21H20O12	Quercetin-4'-O-glucoside (Spiraeoside)	槲皮素-4'-O-葡萄糖苷 (绣线菊苷)	Flavonoids	黄酮	Flavonols	黄酮醇	20229-56-5	1	2425100	2637400	2713400	3064300	3117600	3038100	2744100	3077800	2293000	250270	183530	221510	239570	188200	181860	131740	146130	150470	1413300	1370900	1698000	1449200
Lmdp003286	1	C21H20O12	Isohyperoside	异金丝桃苷	Flavonoids	黄酮	Flavonols	黄酮醇	35589-21-0	1	3703200	4502800	3667900	3912600	4423000	4199600	3308900	3506100	4159100	790070	876180	902910	805940	831050	806010	690910	683280	665870	2109700	2023400	2005700	2099700
Lmzp002365	2	C22H24O11	Hesperetin-7-O-glucoside	橙皮素-7-O-葡萄糖苷	Flavonoids	黄酮	Flavanones	二氢黄酮	31712-49-9	3	133630	152240	351800	197190	357610	134380	1027300	143930	205600	271150	1060900	1338100	1066700	1573800	1883100	2703000	1531900	721210	761350	675690	750050	692770
Lmhp009769	1	C22H44NO7P	LysoPE 17:1	溶血磷脂酰乙醇胺 17:1	Lipids	脂质	LPE	溶血磷脂酰乙醇胺	-	1	318070	263220	210640	59028	71844	48044	65013	73976	68664	322040	304010	374160	44497	44594	49262	30116	30882	44498	125290	122360	117030	111080
Lmhp009464	1	C22H44NO7P	LysoPE 17:1(2n isomer)	溶血磷脂酰乙醇胺 17:1(2n异构)	Lipids	脂质	LPE	溶血磷脂酰乙醇胺	-	1	146480	131800	135960	33262	40793	31016	26671	42713	26920	171030	116660	139830	29796	28645	26250	18066	17002	18136	65244	60936	70759	60631
Xmsn002700	1	C21H22O12	Taxifolin-3'-O-glucoside	花旗松素-3'-O-葡萄糖苷	Flavonoids	黄酮	Flavanonols	二氢黄酮醇	31106-05-5	3	35373	73893	54913	62914	102830	56378	67565	61083	52844	9	9	9	9	9	9	9	9	9	40619	38034	31017	48627
Lmhp010162	1	C22H46NO7P	LysoPE 17:0	溶血磷脂酰乙醇胺 17:0	Lipids	脂质	LPE	溶血磷脂酰乙醇胺	-	3	61493	54291	51658	9994.5	22649	16671	19214	20152	18977	102110	97670	103570	38272	33127	23818	19562	18456	20136	52745	48262	45194	52740
pmd0130	1	C22H46NO7P	LysoPC 14:0	溶血磷脂酰胆碱 14:0	Lipids	脂质	LPC	溶血磷脂酰胆碱	20559-16-4	1	1968300	2050300	1737000	453820	516860	455820	452840	454390	463060	2682500	2624300	2949300	576010	458680	471490	342720	397380	502730	1014600	1121200	1062800	1023600
pmb1912	1	C20H23N7O7	10-Formyltetrahydrofolic Acid	10-甲酰四氢叶酸	Alkaloids	生物碱	Alkaloids	生物碱	2800-34-2	3	419280	306350	360700	206160	217890	199900	134560	158080	146820	216300	204040	186460	125690	108010	170280	76626	98296	83926	121500	106880	134800	148280
Lmhp008233	1	C23H40NO7P	LysoPE 18:4	溶血磷脂酰乙醇胺 18:4	Lipids	脂质	LPE	溶血磷脂酰乙醇胺	-	2	101380	89846	89387	16470	20700	17262	20484	21150	10661	122710	121560	144140	19005	21142	19440	14095	9600	13823	40251	33910	42065	35970
pmn001727	1	C24H29NO9	N-(4-O-(Glucosyl)-E-feruloyl)-tyramine	N-(4-O-(葡萄糖基)-E-阿魏酰)-酪胺	Alkaloids	生物碱	Phenolamine	酚胺	-	3	56824	40207	43903	47134	38845	34145	66562	88492	31797	29053	21275	29590	22824	19455	13386	11983	18015	27300	34643	45220	46842	54003
Lmhp008801	1	C23H42NO7P	LysoPE 18:3	溶血磷脂酰乙醇胺 18:3	Lipids	脂质	LPE	溶血磷脂酰乙醇胺	-	1	7731600	7311600	6516200	1896100	2613100	1979700	2218800	2155600	1930300	7609900	7714100	8852200	1763200	1628800	1696300	928460	945510	1168300	2961900	3145000	3044400	3148400
Lmhp008589	1	C23H42NO7P	LysoPE 18:3(2n isomer)	溶血磷脂酰乙醇胺 18:3(2n异构)	Lipids	脂质	LPE	溶血磷脂酰乙醇胺	-	1	17363000	16593000	16429000	5075600	6054500	5379500	4527200	5259100	4605000	17162000	16003000	17669000	3829400	4218600	4261300	1942600	1885800	2704900	6789200	6661700	6614600	6364500
pmp000583	1	C22H20O12	Diosmetin-7-O-glucuronide	香叶木素-7-O-葡萄糖醛酸苷	Flavonoids	黄酮	Flavones	黄酮	35110-20-4	3	2808700	2251400	2301300	2548700	2607400	2445400	1776400	2559300	1939100	707500	439620	438520	448090	419870	455590	276250	491480	290800	1019000	1145100	1045900	1022200
pmb0881	1	C23H44NO7P	LysoPE 18:2	溶血磷脂酰乙醇胺 18:2	Lipids	脂质	LPE	溶血磷脂酰乙醇胺	-	1	755110	737870	631900	218340	260580	260650	361770	336820	332200	827550	893580	893090	256070	263840	246000	206310	192890	262490	370180	420810	413040	421840
pmb0874	1	C23H44NO7P	LysoPE 18:2(2n isomer)	溶血磷脂酰乙醇胺 18:2(2n异构)	Lipids	脂质	LPE	溶血磷脂酰乙醇胺	-	1	3917000	3672200	3745700	1240500	1534700	1345100	1392000	1662700	1426700	3976700	3645700	3901600	1095900	1245400	1249700	771340	702520	973000	1765900	1660100	1693000	1675300
Lmmp003783	1	C21H18O13	Quercetin-3-O-glucuronide	槲皮素-3-O-葡萄糖醛酸苷	Flavonoids	黄酮	Flavonols	黄酮醇	22688-79-5	2	25772000	24106000	19838000	24118000	26362000	26147000	25929000	22786000	23473000	6236100	11361000	11971000	11267000	5728500	415760	4010200	4666800	14560000	16945000	21544000	16902000	17028000
Hmcp002207	1	C22H22O12	Isorhamnetin-7-O-glucoside (Brassicin)*	异鼠李素-7-O-葡萄糖苷 (蔓菁苷)*	Flavonoids	黄酮	Flavonols	黄酮醇	6743-96-0	1	21778000	20202000	18326000	23343000	21876000	20258000	18519000	15715000	22417000	10854000	13570000	13602000	13651000	12999000	20351000	9957400	9143900	8336000	22060000	21692000	20503000	21380000
Lmjp003044	1	C22H22O12	Isorhamnetin-3-O-Glucoside*	异鼠李素-3-O-葡萄糖苷*	Flavonoids	黄酮	Flavonols	黄酮醇	5041-82-7	1	24205000	21421000	19757000	24510000	23968000	21696000	20522000	17330000	23969000	11383000	13933000	14765000	14195000	13732000	21844000	10544000	9503600	9027500	22994000	23804000	22673000	23256000
mws0289	1	C23H46NO7P	LysoPE 18:1	溶血磷脂酰乙醇胺 18:1	Lipids	脂质	LPE	溶血磷脂酰乙醇胺	89576-29-4	1	15886000	16705000	12497000	2445300	3480800	2505400	4218700	5065400	4505700	16617000	14639000	27362000	2273500	2004500	2522400	2431800	2003600	2439000	7045200	7311800	7082500	7030600
pmb2260	1	C23H46NO7P	LysoPC 15:1	溶血磷脂酰胆碱 15:1	Lipids	脂质	LPC	溶血磷脂酰胆碱	-	3	95589	105890	94206	26153	28789	22800	31293	38097	28407	185530	139650	202570	47453	34048	47172	23056	22676	28220	64981	64564	72911	47666
pmb0856	1	C23H46NO7P	LysoPE 18:1(2n isomer)	溶血磷脂酰乙醇胺 18:1(2n异构)	Lipids	脂质	LPE	溶血磷脂酰乙醇胺	-	1	34083000	36669000	30853000	6464700	8545600	6451500	9018300	11777000	8868900	38691000	29643000	33237000	5039900	5213300	6584500	4592500	4040500	5478100	15082000	15200000	14616000	14082000
pmb0880	1	C23H48NO7P	LysoPE 18:0(2n isomer)	溶血磷脂酰乙醇胺 18:0(2n异构)	Lipids	脂质	LPE	溶血磷脂酰乙醇胺	-	2	236920	258040	206640	42569	50675	39101	53010	69670	52897	276700	186780	223960	30509	31903	34045	26901	21347	29433	98940	93131	81372	88022
pmb2319	1	C23H48NO7P	LysoPC 15:0	溶血磷脂酰胆碱 15:0	Lipids	脂质	LPC	溶血磷脂酰胆碱	108273-89-8	1	849940	783830	734310	201710	276340	218610	198460	219210	190020	1138300	993720	1127500	303080	243400	267230	150120	185400	157210	518970	565770	574510	565170
Lmhp009129	1	C23H48NO7P	LysoPC 15:0(2n isomer)	溶血磷脂酰胆碱 15:0(2n异构)	Lipids	脂质	LPC	溶血磷脂酰胆碱	-	1	198740	204370	178130	45337	61941	43025	62074	42638	40928	329180	230440	311440	50031	43942	51513	20256	31199	45519	88817	87855	133910	104390
pmb0883	1	C23H48NO7P	LysoPE 18:0	溶血磷脂酰乙醇胺 18:0	Lipids	脂质	LPE	溶血磷脂酰乙醇胺	69747-55-3	3	1291700	1171200	933170	107030	167970	131010	122570	181400	151830	1544000	1632100	2723400	208310	152980	149240	93614	85434	99232	586340	591400	552510	563960
pmb3072	2	C22H26O12	3-O-p-Coumaroylshikimic acid-O-glucoside	3-O-对香豆酰莽草酸-O-葡萄糖苷	Phenolic acids	酚酸类	Phenolic acids	酚酸类	-	3	9	9	9590.6	9	9	9	9	9	9	45640	62370	55093	37219	54872	58066	58116	56259	51587	36412	24968	30443	34379
Hmyn007168	1	C22H45O9P	LysoPG 16:0	溶血磷脂酰甘油 16:0	Lipids	脂质	Glycerol ester	甘油酯	-	2	170010	356860	368680	326840	93316	108400	97917	109690	146560	123140	136750	158490	184390	66560	64280	38170	43858	39946	6505.7	11228	9354.5	10231
pma1303	1	C24H46NO7P	LysoPC 16:2	溶血磷脂酰胆碱 16:2	Lipids	脂质	LPC	溶血磷脂酰胆碱	-	1	1549600	1482800	1170900	541790	676800	468370	198650	216440	181310	1584800	1397700	1972400	375500	302100	250420	93834	103020	129780	577430	579060	573800	580970
pmb0863	1	C24H46NO7P	LysoPC 16:2(2n isomer)	溶血磷脂酰胆碱 16:2(2n异构)	Lipids	脂质	LPC	溶血磷脂酰胆碱	-	1	1856900	1799100	1441100	532880	582980	537270	432060	496920	396080	1974500	1590600	1770200	319390	236710	260170	102680	165610	208630	604900	610640	629330	618230
pmp001270	1	C24H48NO7P	LysoPC 16:1	溶血磷脂酰胆碱 16:1	Lipids	脂质	LPC	溶血磷脂酰胆碱	76790-27-7	1	4543800	4622000	3492500	871850	1073500	932390	1180000	767500	1330500	4945300	4230600	6218900	1030100	735710	729680	719520	578980	832950	1568500	1567800	1581200	1621600
Lmhp008833	1	C24H48NO7P	LysoPC 16:1(2n isomer)	溶血磷脂酰胆碱 16:1(2n异构)	Lipids	脂质	LPC	溶血磷脂酰胆碱	-	1	7623700	7487900	6775700	2008400	2361700	2098500	2899200	3268300	3122900	7499000	6686900	6908600	1361900	1050800	1274900	967880	1102900	1474700	2772100	2763900	2605300	2564500
pmd0132	1	C24H50NO7P	LysoPC 16:0(2n isomer)	溶血磷脂酰胆碱 16:0(2n异构)	Lipids	脂质	LPC	溶血磷脂酰胆碱	-	1	13394000	12878000	11501000	2400200	3031100	2350400	2653700	3164300	3196100	15049000	14418000	16492000	2855200	2225700	2035800	1644000	1877800	1991400	5441400	5535300	4958500	6029000
pmb0855	1	C24H50NO7P	LysoPC 16:0	溶血磷脂酰胆碱 16:0	Lipids	脂质	LPC	溶血磷脂酰胆碱	17364-16-8	1	16731000	16871000	15167000	2672200	3459800	2592400	2627000	2923000	2928100	18956000	16732000	19972000	3199500	2312300	2233200	1504800	1735300	2140500	6098100	6338900	6101000	6124200
Lmhp008688	1	C25H42NO7P	LysoPE 20:5	溶血磷脂酰乙醇胺 20:5	Lipids	脂质	LPE	溶血磷脂酰乙醇胺	-	1	10602	100420	6846.3	3833.1	7473.3	57464	9263.5	16761	3058.7	722450	96991	1035700	65452	3410.1	298.01	44879	44592	118590	99526	102180	109510	107000
Lmhp009349	1	C25H44NO7P	LysoPE 20:4(2n isomer)	溶血磷脂酰乙醇胺 20:4(2n异构)	Lipids	脂质	LPE	溶血磷脂酰乙醇胺	-	3	124120	126900	111480	40883	47882	51228	44930	51485	44898	138470	123740	154220	36474	37387	45179	25868	28249	39100	52822	60835	60569	60999
Lmhp009497	1	C25H44NO7P	LysoPE 20:4	溶血磷脂酰乙醇胺 20:4	Lipids	脂质	LPE	溶血磷脂酰乙醇胺	-	3	17309	19381	12951	5362.9	7211.3	6956.3	7788.3	7439	9994.2	28859	24099	44429	8095.9	7568.7	6899.1	7254.9	6629.5	7265.4	15100	18656	16028	10220
Lmhp009802	1	C25H46NO7P	LysoPE 20:3(2n isomer)	溶血磷脂酰乙醇胺 20:3(2n异构)	Lipids	脂质	LPE	溶血磷脂酰乙醇胺	-	2	142700	127990	115070	19505	29812	32743	28691	37454	34288	187000	152450	185390	40490	25208	30384	17845	14885	30887	52883	67001	63928	62768
Lmhp010040	1	C25H46NO7P	LysoPE 20:3	溶血磷脂酰乙醇胺 20:3	Lipids	脂质	LPE	溶血磷脂酰乙醇胺	-	2	257310	290180	241480	54352	72424	57600	77665	86821	84132	311200	284360	361830	53163	58848	47881	30649	31287	45756	112210	112720	107910	103680
HJAP135	2	C24H24O12	Pinocembrin-7-O-(6''-O-malonyl)glucoside	乔松素-7-O-(6''-O-丙二酰)葡萄糖苷	Flavonoids	黄酮	Flavanones	二氢黄酮	-	1	2795300	2703300	3127400	3011500	3156700	3349500	4420000	3494700	4892700	6901100	9560800	8204900	8387400	9766300	11306000	12065000	9177100	11833000	5268100	5418100	5339100	5473400
Lmhp008718	1	C25H48NO7P	LysoPC 17:2	溶血磷脂酰胆碱 17:2	Lipids	脂质	LPC	溶血磷脂酰胆碱	-	1	1155100	1035900	1077500	373550	424150	416640	400740	465640	367250	1031300	962950	961240	223790	187270	210690	83081	125580	196840	363790	358960	355780	328260
Lmhp010514	1	C25H48NO7P	LysoPE 20:2(2n isomer)	溶血磷脂酰乙醇胺 20:2(2n异构)	Lipids	脂质	LPE	溶血磷脂酰乙醇胺	-	1	219060	253840	240830	57474	92706	84784	98218	107240	95872	384250	375580	388880	96234	130060	104520	62378	63437	71869	135310	138280	139060	136060
Lmhp010757	1	C25H48NO7P	LysoPE 20:2	溶血磷脂酰乙醇胺 20:2	Lipids	脂质	LPE	溶血磷脂酰乙醇胺	-	1	888250	930890	846570	165620	228580	224450	328390	413880	327880	1298200	1168300	1371100	243230	273670	190710	133340	145730	195330	406450	424560	425090	393210
Lmhp009590	1	C25H50NO7P	LysoPC 17:1	溶血磷脂酰胆碱 17:1	Lipids	脂质	LPC	溶血磷脂酰胆碱	-	1	507550	460720	419330	83081	104110	81784	136140	127220	111320	514380	454430	511630	97027	59254	83396	51016	59200	67207	180750	199340	126630	157920
pmb2406	1	C25H52NO7P	LysoPC 17:0	溶血磷脂酰胆碱 17:0	Lipids	脂质	LPC	溶血磷脂酰胆碱	50930-23-9	1	207000	164170	116120	34226	64534	41733	40327	31859	56879	355160	268930	278610	81245	50257	28211	53260	39717	29595	97140	129330	127000	95635
Lmhp010515	1	C25H52NO7P	LysoPC 17:0(2n isomer)	溶血磷脂酰胆碱 17:0(2n异构)	Lipids	脂质	LPC	溶血磷脂酰胆碱	-	1	206010	161230	168750	54182	60343	36109	45872	55744	55517	330100	262750	281430	73787	67678	55054	51599	57113	56266	126230	142130	143030	146800
Hmqp006235	1	C26H46NO7P	LysoPC 18:4	溶血磷脂酰胆碱 18:4	Lipids	脂质	LPC	溶血磷脂酰胆碱	-	1	660060	592940	530000	255790	289970	275920	172940	172500	174580	473650	479300	503040	122940	109520	117830	45675	60839	95967	206480	103310	167850	188050
Lmhp010573	1	C27H48O9	1-Linoleoylglycerol-3-O-glucoside	1-亚油酰甘油酯-3-O-葡萄糖苷	Lipids	脂质	Glycerol ester	甘油酯	-	1	33410	44911	23185	11150	19318	7408.8	31726	40173	37792	21980	21718	12885	20903	12570	8597.5	8780	22640	11374	31980	30287	27941	26067
Lmhp010334	1	C27H48O9	2-Linoleoylglycerol-1-O-glucoside	2-亚油酰甘油酯-1-O-葡萄糖苷	Lipids	脂质	Glycerol ester	甘油酯	-	1	12150	13013	5882.3	6252.1	7398.2	8324	8070	20354	11887	5889.6	5623.2	6880	3613.3	3228.1	3320	4615.6	4274.8	2655.7	10796	11024	11568	13384
pmb0865	1	C26H48NO7P	LysoPC 18:3(2n isomer)	溶血磷脂酰胆碱 18:3(2n异构)	Lipids	脂质	LPC	溶血磷脂酰胆碱	-	1	2350800	2362200	2078500	1036600	1086900	995000	855260	870870	755660	1991400	1997800	2220100	571440	431910	579460	185930	266190	340140	934310	891300	899900	852610
pmb0854	1	C26H48NO7P	LysoPC 18:3	溶血磷脂酰胆碱 18:3	Lipids	脂质	LPC	溶血磷脂酰胆碱	-	1	8009800	9206800	7302500	3416200	4099600	3126000	3340200	2967400	3102600	9730600	9691300	11127000	2660700	2386300	2895900	1384700	1517900	1818600	3755800	4648400	4532900	4355600
pmp001251	1	C26H50NO7P	LysoPC 18:2(2n isomer)	溶血磷脂酰胆碱 18:2(2n异构)	Lipids	脂质	LPC	溶血磷脂酰胆碱	-	1	3049000	3016900	2796500	1105200	1277300	1156500	1451900	1631200	1489900	2678400	2570100	2774500	708670	580320	671450	439090	465440	818730	1298600	1278100	1336200	1406500
pmp001273	1	C26H50NO7P	LysoPC 18:2	溶血磷脂酰胆碱 18:2	Lipids	脂质	LPC	溶血磷脂酰胆碱	-	1	10499000	11353000	9446600	5253000	5853000	5442700	7629400	7430600	6872900	11346000	11922000	13138000	5523900	4754500	5244600	4205800	4577300	5694600	7195000	7764900	7293800	8053700
Li512111	2	C24H24O13	Isorhamnetin-3-O-(6''-acetylglucoside)	异鼠李素-3-O-(6''-乙酰)葡萄糖苷	Flavonoids	黄酮	Flavonols	黄酮醇	-	2	83079	58466	60135	63435	69242	69850	60921	70783	64506	322640	122130	177390	244280	124200	158470	72721	121400	70964	189290	190530	181200	242960
Lmsp003655	2	C26H32O11	Dehydrodiconiferyl alcohol-gamma'-O-glucoside	脱氢二松柏醇-γ'-O-葡萄糖苷	Phenolic acids	酚酸类	Phenolic acids	酚酸类	-	1	659450	624110	585580	794910	463390	521820	875880	545530	576030	1195400	1627400	1376800	1889300	1293500	1941300	1913100	1738300	1727200	1024600	881230	1070400	1069000
pmn001378	2	C26H32O11	Pinoresinol-4-O-glucoside	松脂醇-4-O-葡萄糖苷	Lignans and Coumarins	木脂素和香豆素	Lignans	木脂素	41607-20-9	3	43590	97204	43840	57184	61225	57946	47823	92308	90086	52491	80944	116110	121050	136410	127790	184430	117530	172210	69493	78343	93579	76437
pmp001281	1	C26H52NO7P	LysoPC 18:1	溶血磷脂酰胆碱 18:1	Lipids	脂质	LPC	溶血磷脂酰胆碱	-	1	143890	186360	135000	27686	28876	22453	56581	63239	67859	144120	125920	157030	20288	15112	22146	20243	29325	27578	63815	70359	65218	79133
Lmhp010190	1	C26H52NO7P	LysoPC 18:1(2n isomer)	溶血磷脂酰胆碱 18:1(2n异构)	Lipids	脂质	LPC	溶血磷脂酰胆碱	-	1	1489500	1654000	1437700	322080	420040	317080	553690	691360	550920	1445100	1128700	1213900	179010	143000	223360	117660	173450	225210	673960	647140	632950	602090
Jmhn004431	2	C23H22O14	syringetin-3-glucuronide	丁香亭-3-O-葡萄糖醛酸苷	Flavonoids	黄酮	Flavonols	黄酮醇	-	2	122680	170870	125870	39628	43815	36618	64923	55977	56456	530460	623420	555330	313990	376990	502330	559330	415100	454830	124320	121670	136700	198990
mws0126	1	C26H54NO7P	LysoPC 18:0	溶血磷脂酰胆碱 18:0	Lipids	脂质	LPC	溶血磷脂酰胆碱	19420-57-6	1	3296700	2954500	2405300	459570	538290	400430	521000	564720	534460	4168100	3990000	4589100	681420	475580	626410	489510	448530	470880	1373000	1293000	1207000	1237000
pmd0136	1	C26H54NO7P	LysoPC 18:0(2n isomer)	溶血磷脂酰胆碱 18:0(2n异构)	Lipids	脂质	LPC	溶血磷脂酰胆碱	-	1	227290	427770	172030	34121	43140	26146	41656	37522	53890	253850	256570	306940	38326	32007	29998	35221	28152	31352	117970	81485	96432	121410
Lmhp007840	1	C27H52NO7P	LysoPC 19:2	溶血磷脂酰胆碱 19:2	Lipids	脂质	LPC	溶血磷脂酰胆碱	-	2	1796300	1937400	1718600	1088000	1137600	845010	52297	62606	45418	2745300	1807700	2298700	567440	443540	334350	9	9	9	837480	768320	743180	724100
Lmmp003817	2	C24H22O14	Kaempferol-3-O-(6''-malonyl)glucoside*	山奈酚-3-O-(6''-丙二酰)葡萄糖苷*	Flavonoids	黄酮	Flavonols	黄酮醇	-	3	161990	208900	245450	95614	108790	207310	130210	144910	222170	756040	229110	140150	123660	70676	185320	244550	161440	491980	218170	207530	178490	259930
Lmdp004892	2	C24H22O14	Kaempferol-3-O-(6''-malonyl)galactoside*	山奈酚-3-O-(6''-丙二酰)半乳糖苷*	Flavonoids	黄酮	Flavonols	黄酮醇	-	3	233220	182770	225780	120240	157120	159320	159500	141820	231980	773580	375150	193350	146580	51316	239670	233130	239120	570040	165110	174720	184690	173750
Lmhp010908	1	C27H54NO7P	LysoPC 19:1	溶血磷脂酰胆碱 19:1	Lipids	脂质	LPC	溶血磷脂酰胆碱	-	1	463360	454870	433810	91491	98291	77583	78261	121460	93203	397300	280080	301940	43209	33691	38591	17529	28016	42701	131380	121150	129380	126290
pmb2228	1	C27H56NO7P	LysoPC 19:0	溶血磷脂酰胆碱 19:0	Lipids	脂质	LPC	溶血磷脂酰胆碱	108273-88-7	3	53361	41096	52666	11728	12837	10115	13640	23376	13664	53867	29377	36186	3558.3	6640.9	8414.7	4162.5	8448.2	8925	20412	20795	12646	20524
Lmdn001925	2	C26H34O12	Olivil-4'-O-glucoside	橄榄树脂素-4'-O-葡萄糖苷	Lignans and Coumarins	木脂素和香豆素	Lignans	木脂素	76880-93-8	2	21570	18611	14201	14741	8425.6	9	17188	4443.8	13476	51589	57363	47152	64472	51979	80184	70679	50409	57922	42344	52989	46350	59813
Zmdn003480	2	C26H34O12	Cycloolivil-6-O-glucoside	环橄榄树脂素-6-O-葡萄糖苷	Lignans and Coumarins	木脂素和香豆素	Lignans	木脂素	-	2	10892	15223	18443	13899	7233.8	10045	22201	10406	13022	36949	63066	54513	62320	59197	81935	77036	52553	72700	40586	45390	44997	55424
Lmhp008742	1	C28H48NO7P	LysoPC 20:5	溶血磷脂酰胆碱 20:5	Lipids	脂质	LPC	溶血磷脂酰胆碱	162440-04-2	2	7061.9	236440	9	9	9	70181	14424	18060	16444	759650	130530	1047100	220490	5977.4	9	47744	44937	119420	107890	95828	96625	103360
pmp001282	1	C28H50NO7P	Propyl 2-(trimethylammonio)ethyl phosphate	磷酸丙二(三甲铵)乙酯	Others	其它类	Others	其它	-	1	22511000	23330000	18549000	3291300	4446800	3162800	7489700	7943900	7298700	21561000	18666000	22501000	2363400	2016300	2903900	2627200	2911400	3494400	8745000	9273100	10181000	9847800
Lmhp009890	1	C28H52NO7P	LysoPC 20:3	溶血磷脂酰胆碱 20:3	Lipids	脂质	LPC	溶血磷脂酰胆碱	1199257-41-4	1	784640	789840	694250	182930	202630	183590	184010	205570	187050	900910	773900	880510	126110	120170	137930	65247	77303	105530	262370	277750	257480	261310
pmd0146	1	C28H54NO7P	LysoPC 20:2(2n isomer)	溶血磷脂酰胆碱 20:2(2n异构)	Lipids	脂质	LPC	溶血磷脂酰胆碱	-	3	765300	754440	790790	193960	188370	223370	245290	245350	236690	991210	916350	968210	189290	208470	172550	117980	122310	191300	313190	309670	243360	291560
pmd0147	1	C28H54NO7P	LysoPC 20:2	溶血磷脂酰胆碱 20:2	Lipids	脂质	LPC	溶血磷脂酰胆碱	-	3	1263700	1256400	1160600	279310	320970	299390	415790	423250	422760	1927300	1719700	2033000	401040	418740	343720	285120	305770	395010	553500	531630	564440	535550
pmp000588	2	C25H24O14	Diosmetin-7-O-(6''-malonyl)glucoside	香叶木素-7-O-(6''-O-丙二酰)葡萄糖苷	Flavonoids	黄酮	Flavones	黄酮	-	3	4322.1	7603	12359	4920.6	3851.9	4341.3	5379.4	1333.5	7392	43938	16863	32084	26549	17425	29084	23677	33868	55077	24926	21597	18680	25852
Zmhp006502	2	C25H24O14	Kaempferide-3-O-(6''-malonyl)glucoside	山奈素-3-O-(6''-丙二酰)葡萄糖苷	Flavonoids	黄酮	Flavonols	黄酮醇	-	2	93765	171480	83932	38031	39433	178420	137550	158690	121870	630550	267060	522390	840650	275270	159470	146980	407730	234980	303350	348370	331530	336900
pmb0608	2	C25H24O14	Chrysoeriol-7-O-(6''-malonyl)glucoside	金圣草黄素-7-O-(6''-丙二酰)葡萄糖苷	Flavonoids	黄酮	Flavones	黄酮	-	2	141160	141260	138150	57239	89387	118610	143050	106810	134240	727570	230070	371920	283480	224010	335320	347160	399400	601550	322160	391040	385880	346180
Lmhp011549	1	C28H56NO7P	LysoPC 20:1	溶血磷脂酰胆碱 20:1	Lipids	脂质	LPC	溶血磷脂酰胆碱	-	1	745820	769770	729030	157150	170210	148940	168950	206010	158510	772470	642310	659450	104440	99389	105110	63771	78069	91234	240500	231090	216340	205300
pmp000589	1	C24H22O15	Quercetin-7-O-(6''-malonyl)glucoside	槲皮素-7-O-(6''-丙二酰)葡萄糖苷	Flavonoids	黄酮	Flavonols	黄酮醇	-	1	3292900	2573100	3215400	2194900	2468400	2834100	1883100	2222800	3932500	2368500	1620400	1992200	1395400	1359300	1929800	1214100	1085400	1340900	2211700	2430800	2459400	2508900
Lmmn002260	2	C27H36O12	5'-Methoxyisolariciresinol-9'-O-glucoside	5'-甲氧基异落叶松脂醇-9'-O-葡萄糖苷	Lignans and Coumarins	木脂素和香豆素	Lignans	木脂素	-	2	72096	53860	33265	66298	32415	37077	52273	57529	55568	81554	78056	105570	85180	115410	75360	96045	111760	97457	52495	62628	92062	86694
Hmyn007087	1	C25H49O11P	LysoPI 16:0	溶血磷脂酰肌醇 16:0	Lipids	脂质	Glycerol ester	甘油酯	-	3	3756.7	3182.5	3299.4	2119.9	2308.6	2463.4	2100.8	1402.1	1645.9	3791	3580.5	2415.1	4115.8	2477.3	2209.3	1055.7	1399.1	1673.3	2640.6	3213.2	2821.7	1827.6
Rfmb25702	2	C28H34O12	Pinoresinol-4-O-(6''-acetyl)glucoside	松脂醇-4-O-(6''-乙酰)葡萄糖苷	Lignans and Coumarins	木脂素和香豆素	Lignans	木脂素	-	3	65497	62841	77997	29754	45580	56457	94114	48739	74800	184080	272590	290450	302110	338860	437770	382970	311610	367780	158960	153650	154710	180870
HJAP064	2	C25H24O15	Isorhamnetin-3-O-(6''-malonyl)glucoside	异鼠李素-3-O-(6''-丙二酰)葡萄糖苷	Flavonoids	黄酮	Flavonols	黄酮醇	-	2	81493	50671	37216	35288	44434	64973	36502	60364	46633	142870	91708	95237	108710	70112	80634	63299	44447	34257	146740	125000	139370	112160
pmb2922	2	C15H24N2O17P2	Uridine 5'-diphospho-D-glucose	尿苷 5'-二磷酸-D-葡萄糖	Nucleotides and derivatives	核苷酸及其衍生物	Nucleotides and derivatives	核苷酸及其衍生物	133-89-1	2	267260	300320	282570	1004200	987860	1037700	437510	480650	594210	285810	501940	382530	1210800	1255600	1076700	638530	573600	253860	603780	692830	759150	751670
Lmmp003306	1	C25H26O15	Quercetin-3-O-xylosyl(1→2)arabinoside	槲皮素-3-O-木糖基(1→2)阿拉伯糖苷	Flavonoids	黄酮	Flavonols	黄酮醇	-	2	4208400	4373000	4033300	6205600	5904500	5361300	4190700	6090700	4732500	3483700	3197300	3149200	3567400	3051000	3377800	2316600	2590600	2496900	5040900	5345600	4786400	5799000
mws0047	1	C27H30O14	Apigenin-7-O-neohesperidoside (Rhoifolin)	芹菜素-7-O-新橙皮糖苷 (野漆树苷)	Flavonoids	黄酮	Flavones	黄酮	17306-46-6	3	100760	63804	179760	32612	20464	11720	11003	31701	22744	19396	15081	24771	20315	11748	12035	10421	17393	6922.3	17522	28216	38413	25779
mws1409	1	C15H22N2O18P2	Uridine-5'-diphosphoglucuronic acid	尿苷-5'-二磷酸葡萄糖醛酸	Nucleotides and derivatives	核苷酸及其衍生物	Nucleotides and derivatives	核苷酸及其衍生物	-	3	55790	54226	58786	36362	41190	36507	44044	39808	33586	81173	76823	108080	33996	36343	35031	52107	48235	22062	36419	41042	72561	63608
HJAP148	2	C26H28O15	Kaempferol-3-O-sambubioside	山奈酚-3-O-桑布双糖苷	Flavonoids	黄酮	Flavonols	黄酮醇	27661-51-4	1	3768100	3778600	3647700	3766300	3748600	3795900	3242900	3862600	3862900	15434000	6297500	6666800	5960300	4663200	3730700	4589000	8930100	7732100	4422000	4593500	4930100	5243000
Zmjp003179	2	C26H28O15	Orientin-2''-O-xyloside	荭草苷-2''-O-木糖苷	Flavonoids	黄酮	Flavonoid carbonoside	黄酮碳糖苷	-	3	9548.1	4394.2	11549	15901	11291	14763	9357.1	16618	10545	19107	16705	15923	9794	11294	32669	16662	20949	27210	12301	9329	17782	16144
Hmcp001769	1	C26H28O15	Quercetin-3-O-rhamnosyl(1→2)arabinoside	槲皮素-3-O-鼠李糖基(1→2)阿拉伯糖苷	Flavonoids	黄酮	Flavonols	黄酮醇	-	2	33337	16396	16615	27854	22349	25374	18400	26942	21427	11460	9664.9	10196	4766.2	10579	8627.7	5344.7	14892	9695.4	12406	18162	19949	15437
pmb4486	2	C29H40N8O5	Hordatine B	大麦芽新碱 B	Alkaloids	生物碱	Phenolamine	酚胺	10502-21-3	3	4456	9	9	9	9	9	9	9	4067.2	36687	20275	24251	31917	32962	25798	20152	21272	19939	16408	15502	20685	23545
Xmzn007677	1	C33H35N5O5	Ergotamine	麦角胺	Alkaloids	生物碱	Plumerane	吲哚类生物碱	113-15-5	3	4124700	4005600	3053100	670030	999510	750800	1437500	1586500	1349300	3346000	3301000	3578200	516530	401290	659170	522880	568490	718650	1708900	1796300	1631400	1663300
pmb0492	1	C34H37N3O6	N',N'',N'''-p-Coumaroyl-cinnamoyl-caffeoyl spermidine	N',N'',N'''-对香豆酰肉桂酰咖啡酰亚精胺	Alkaloids	生物碱	Phenolamine	酚胺	-	1	659280	606410	619880	228450	211180	200080	174590	324510	318340	615460	399330	375370	183710	197490	224740	174250	206380	111130	370170	447590	452970	443820
pmp001288	2	C28H32O14	Acacetin-7-O-rutinoside (Linarin)	金合欢素-7-O-芸香糖苷 (蒙花苷)	Flavonoids	黄酮	Flavones	黄酮	480-36-4	1	2283000	2265900	1718000	1269300	1316500	1211100	1449300	2050600	1336700	4614200	3886600	3185600	5379100	3933300	2239000	1516200	3820100	821380	3891800	4239800	4249900	4046000
Lmhn005088	1	C29H22O14	7,3'-Di-O-gallyoltricetiflavan	7,3'-二-O-没食子酰基特利色黄烷	Flavonoids	黄酮	Flavanols	黄烷醇类	-	2	82949	78296	112150	134110	106390	116070	123990	143090	126530	62414	50243	49129	36964	37958	36816	36384	47885	32693	95435	88082	91061	147030
pmp000593	2	C27H30O15	Luteolin-7-O-rutinoside	木犀草素-7-O-芸香糖苷	Flavonoids	黄酮	Flavones	黄酮	3563-98-2	1	3721500	3042500	4145400	3575100	3596800	3185200	3649400	3256300	3748800	11715000	7592300	6969100	5094300	3950500	7836900	7596100	7024700	10019000	4959100	4980600	5400800	5634200
Hmcp001829	1	C27H30O15	Quercetin-3,7-Di-O-rhamnoside	槲皮素-3,7-二-O-鼠李糖苷	Flavonoids	黄酮	Flavonols	黄酮醇	28638-13-3	3	48733	41187	59013	60107	79285	58786	63201	76033	66838	30478	42620	28500	30140	23078	33463	28645	26262	30548	44316	39977	46647	35586
MWSHY0080	2	C27H30O15	Luteolin-7-O-neohesperidoside (Lonicerin)*	木犀草素-7-O-新橘皮糖苷 (忍冬苷)*	Flavonoids	黄酮	Flavones	黄酮	25694-72-8	1	87771	137430	136140	103460	117780	103890	106030	92317	130020	320610	138640	119610	91366	36953	61284	161260	141850	206850	66014	136870	114380	120140
Lmnp002413	2	C27H30O15	Luteolin-6-C-glucoside-7-O-rhamnoside	木犀草素-6-C-葡萄糖苷-7-O-鼠李糖苷	Flavonoids	黄酮	Flavonoid carbonoside	黄酮碳糖苷	-	2	313620	326140	354190	280530	279690	321870	315940	305940	314860	1110800	612350	677090	397930	349620	689480	634280	587640	868430	403420	449990	424240	342880
Hmjp003008	2	C27H28O16	Luteolin-7-O-glucuronide-5-O-rhamnoside	木犀草素-7-O-葡萄糖醛酸苷-5-O-鼠李糖苷	Flavonoids	黄酮	Flavones	黄酮	-	3	1010400	959080	923130	1140900	1014500	1070100	1368800	1207800	1353000	6951800	8583300	6016100	8658700	7153600	5868800	9150100	6332600	6144500	2887500	3267900	3207200	3035300
MWSHY0190	1	C28H32O15	Diosmetin-7-O-rutinoside (Diosmin)	香叶木苷	Flavonoids	黄酮	Flavones	黄酮	520-27-4	2	1444100	1431700	1353200	1631800	1587900	1600800	1473100	1429900	1542700	294010	706460	533620	367620	734440	983480	812290	362480	247470	846460	852970	935870	837830
MWSslk165	1	C28H32O15	Diosmetin-7-O-Neohesperidoside (Neodiosmin)	香叶木素-7-O-新橘皮糖苷	Flavonoids	黄酮	Flavones	黄酮	38665-01-9	2	1377300	1396200	1298900	1634900	1616300	1443600	1379100	1380800	1515800	275650	650350	591070	433950	807070	980670	756340	432530	295240	828150	814500	806480	826240
Lmmp000897	1	C30H26O14	Gallocatechin-(4α→8)-gallocatechin	没食子儿茶素-(4α→8)-没食子儿茶素	Flavonoids	黄酮	Flavanols	黄烷醇类	-	3	459410	387430	396820	382730	378000	359180	298990	276520	572970	318480	185300	152790	90106	99231	277230	293830	188890	492740	193840	174060	240160	211710
Lmjp002461	1	C27H30O16	Quercetin-3-O-neohesperidoside	槲皮素 3-O-新橘皮糖苷	Flavonoids	黄酮	Flavonols	黄酮醇	117611-67-3	1	34889000	28394000	33574000	30888000	34699000	30630000	19378000	32081000	27467000	16932000	12070000	9665700	8518300	10223000	21820000	8702400	9358500	16954000	22693000	15946000	24897000	22329000
Zmjp003031	1	C27H30O16	Orientin-2''-O-galactoside	荭草素-2''-O-半乳糖苷	Flavonoids	黄酮	Flavonoid carbonoside	黄酮碳糖苷	-	3	211570	192440	200360	168590	194760	189560	142110	122740	260840	121600	102910	91123	37593	47131	131920	168550	103340	251680	124920	119870	118510	114930
Lmyn001269	2	C27H30O16	Kaempferol-3-O-sophoroside	山奈酚-3-O-槐糖苷 (槐属黄酮苷)	Flavonoids	黄酮	Flavonols	黄酮醇	19895-95-5	3	222870	216790	187020	243700	261330	258810	372300	338090	387740	622990	294620	440170	532330	366470	341590	244100	531020	517090	227940	227840	233980	285220
Rfmb26201	2	C30H38O14	Syringaresinol-4'-O-(6''-acetyl)glucoside	丁香树脂酚-4'-O-(6''-乙酰)葡萄糖苷	Lignans and Coumarins	木脂素和香豆素	Lignans	木脂素	-	3	56849	24026	48075	16320	20097	12246	112050	30365	18313	176710	76293	63783	111250	85537	86518	57448	58596	45170	66193	72068	71928	70579
Zmxp002867	2	C28H32O16	Chrysoeriol-5,7-di-O-glucoside	金圣草黄素-5,7-二-O-葡萄糖苷	Flavonoids	黄酮	Flavones	黄酮	-	2	39074	64451	40244	49503	38047	45807	36876	72567	50508	227460	114350	156390	294450	131010	45380	27940	150660	57547	259160	305720	291360	309970
MWSHY0135	1	C28H32O16	Isorhamnetin-3-O-rutinoside (Narcissin)*	异鼠李素-3-O-芸香糖苷 (水仙苷)*	Flavonoids	黄酮	Flavonols	黄酮醇	604-80-8	1	44341000	36195000	39305000	46194000	45049000	40774000	42276000	47199000	41099000	19973000	20367000	22061000	23217000	23626000	35918000	22946000	22431000	19027000	48644000	52333000	54629000	51764000
Lmsp003729	1	C27H30O17	Myricetin-3-O-rutinoside	杨梅素-3-O-芸香糖苷	Flavonoids	黄酮	Flavonols	黄酮醇	-	1	1538500	1109600	872020	1941400	1860800	1681700	2213700	2341800	2621000	386840	464430	708300	414040	568590	1098900	942580	806350	661420	1146500	1316400	1364300	1343800
MWSHY0162	1	C27H30O17	Quercetin-3-O-sophoroside (Baimaside)	槲皮素-3-O-槐糖苷(白麻苷)	Flavonoids	黄酮	Flavonols	黄酮醇	18609-17-1	2	544300	581970	493530	769480	667760	711190	488930	636420	695550	86208	148090	150260	84780	112340	168750	96619	105140	58811	247880	277440	284430	287610
Zmcp002666	1	C27H30O17	Quercetin-3,7-Di-O-glucoside	槲皮素-3,7-二-O-葡萄糖苷	Flavonoids	黄酮	Flavonols	黄酮醇	-	1	465140	396130	512010	599120	508570	519670	347230	395650	655130	16890	24187	13460	21654	30616	75526	63526	28452	39089	108470	173910	137750	110670
pmn001504	1	C36H56O9	Oleanolic acid-3-O-glucuronide	齐墩果酸-3-O-葡萄糖醛酸苷	Terpenoids	萜类	Triterpene Saponin	三萜皂苷	26020-14-4	2	1108.2	553.63	1577.2	916.5	699.23	678.94	705.79	579.58	474.12	1670.3	620.52	1308	9	9	823.69	304.44	912.37	569.65	1311.8	1259.9	671.91	1264.9
Hmlp002975	2	C28H30O17	Isorhamnetin-3-O-glucuronide-7-O-rhamnoside	异鼠李素-3-O-葡萄糖醛酸苷-7-O-鼠李糖苷	Flavonoids	黄酮	Flavonols	黄酮醇	-	3	219030	193840	166820	227640	178400	181530	228480	223820	192670	416920	432840	486270	500620	360100	490800	304590	450400	339790	335530	441020	337640	383880
Lmmp002560	2	C27H28O18	Quercetin-3-O-(2''-O-glucosyl)glucuronide	槲皮素-3-O-(2''-O-葡萄糖基)葡萄糖醛酸苷	Flavonoids	黄酮	Flavonols	黄酮醇	-	2	211880	108520	197470	173460	149850	142110	148850	160530	188160	390290	310300	314400	373950	346110	402820	363780	319690	376320	196300	226510	225860	188510
Hmcp001578	1	C28H32O17	Isorhamnetin-3,7-O-diglucoside	异鼠李素-3,7-O-二葡萄糖苷	Flavonoids	黄酮	Flavonols	黄酮醇	6758-51-6	2	1003200	918460	1015300	1164600	1081800	1169600	764560	740390	1056100	313810	269040	301650	291590	267690	519430	206330	130050	179620	565570	629350	614910	567550
Lmsp003252	1	C28H32O17	Isorhamnetin-3-O-sophoroside	异鼠李素-3-O-槐糖苷	Flavonoids	黄酮	Flavonols	黄酮醇	-	1	457000	248750	372750	482770	288670	509980	342100	416800	494920	44475	93161	102000	66512	82402	276970	130870	63024	41141	182680	297360	298390	281710
pmb0530	2	C21H27N7O14P2	Nicotinic acid adenine dinucleotide	烟酸腺嘌呤二核苷酸	Nucleotides and derivatives	核苷酸及其衍生物	Nucleotides and derivatives	核苷酸及其衍生物	53-84-9	2	647140	804280	834100	1241400	1066900	1082200	1303700	1550800	1511200	616060	1128900	819580	1297900	1303500	1171600	1748300	1972400	1529200	1101500	1151800	997660	1090800
Lmhp008744	1	C33H56O14	1-α-Linolenoyl-glycerol-2,3-di-O-glucoside	1-α-亚麻酸甘油酯-2,3-二-O-葡萄糖苷	Lipids	脂质	Glycerol ester	甘油酯	-	1	303210	311460	277610	151260	175810	164250	181510	236980	254330	280330	295860	276360	137930	128250	150340	119480	103930	125370	197520	187210	202200	291190
Lmhp008513	1	C33H56O14	2-α-Linolenoyl-glycerol-1,3-di-O-glucoside	2-α-亚麻酸甘油酯-1,3-二-O-葡萄糖苷	Lipids	脂质	Glycerol ester	甘油酯	-	1	780040	810060	620660	481050	499450	419880	407160	585300	425310	651600	777660	559280	281950	321000	464850	211140	200890	282910	448670	400150	437970	627250
Lmhp009384	1	C33H58O14	1-Linoleoylglycerol-2,3-di-O-glucoside	1-亚油酰甘油酯-2,3-二-O-葡萄糖苷	Lipids	脂质	Glycerol ester	甘油酯	-	1	4505.7	11251	9894.8	3785.3	3229.4	3412	4050.6	7315.3	7597.1	4152.8	2523.1	2854.1	2233.5	2519	2831.8	2001.7	1142.4	2417.2	8273.6	5251	6211.2	7023
Lmhp009190	1	C33H58O14	2-Linoleoylglycerol-1,3-di-O-glucoside	2-亚油酰甘油酯-1,3-二-O-葡萄糖苷	Lipids	脂质	Glycerol ester	甘油酯	-	1	53027	52334	47885	21367	29579	23992	24659	46925	41106	31988	26027	25048	10098	9682.3	22413	11769	13468	17607	38573	31491	28891	42158
Hmlp003185	2	C30H32O18	Luteolin-7-O-(6''-malonyl)glucoside-5-O-rhamnoside	木犀草素-7-O-(6''-丙二酰)葡萄糖苷-5-O-鼠李糖苷	Flavonoids	黄酮	Flavones	黄酮	-	3	22776	10541	23355	5908.6	21135	28348	29582	37308	33876	201900	85190	98028	61612	64305	84202	73032	76293	127110	36047	56835	45854	39775
Lmmp003266	1	C29H30O19	Quercetin-3-O-(2''-malonyl)glucoside-7-O-arabinoside	槲皮素-3-O-(2''-丙二酰)葡萄糖苷-7-O-阿拉伯糖苷	Flavonoids	黄酮	Flavonols	黄酮醇	-	1	1718300	893140	1217400	1040700	1013800	1273700	584710	1206500	1006100	606950	363070	427810	383640	447790	367210	247060	333870	269490	984920	1135700	1130000	1182600
Lmjn003562	2	C32H38O17	3,6'-Diferuloylsucrose	3,6'-二阿魏酰蔗糖	Phenolic acids	酚酸类	Phenolic acids	酚酸类	107172-40-7	3	13332	19566	20155	10399	15540	20265	17383	14419	17523	100350	137990	87085	145000	134830	102160	189870	182360	131550	39192	31176	38876	53844
pmn001368	2	C32H44O17	Olivil-4,4'-Di-O-glucoside	橄榄树脂素-4,4'-二-O-葡萄糖苷	Lignans and Coumarins	木脂素和香豆素	Lignans	木脂素	-	3	27301	22826	15627	31465	20705	17358	39067	6897	14716	48185	64817	47894	65915	55529	107030	81033	60353	60150	50372	46425	57661	52736
Xmyp004678	2	C32H38O19	Kaempferol-3-O-(2-O-Xylosyl-6-O-Rhamnosyl)Glucoside	山奈酚-3-O-(2''-O-木糖基-6''-O-鼠李糖基)葡萄糖苷	Flavonoids	黄酮	Flavonols	黄酮醇	-	1	687520	518410	533740	527560	487870	481190	434280	544590	578600	6174300	1660400	2293400	1472000	1410800	1099400	1752900	2454900	2017000	1207400	1308300	1301200	1376300
Hmmn003584	1	C33H40O19	Luteolin-7-O-rutinoside-5-O-rhamnoside	木犀草素-7-O-芸香糖苷-5-O-鼠李糖苷	Flavonoids	黄酮	Flavones	黄酮	-	3	11419	12907	7489.7	10953	10691	11464	9547	11192	13816	12727	15071	11147	19888	9	9	13786	5860.7	20324	10247	11991	11029	14921
HJAP061	1	C32H38O20	Quercetin-3-O-(2''-O-arabinosyl)rutinoside	槲皮素-3-O-(2''-O-阿拉伯糖基)芸香糖苷	Flavonoids	黄酮	Flavonols	黄酮醇	-	1	35015000	29772000	31018000	35308000	33266000	31900000	22708000	33151000	31642000	16355000	11085000	13729000	8825400	12634000	14049000	7812400	10117000	11032000	27190000	27753000	26288000	28273000
pme2651	2	C21H28N7O17P3	NADP (Nicotinamide adenine dinucleotide phosphate)	烟酰胺腺嘌呤二核苷酸磷酸	Nucleotides and derivatives	核苷酸及其衍生物	Nucleotides and derivatives	核苷酸及其衍生物	53-59-8	3	172970	219050	195340	402870	404750	507270	467990	553650	652430	185190	283290	234080	476890	528760	467610	451890	529480	447080	265340	322200	326750	377030
MWSslk184	1	C34H42O19	3,6'-Disinapoylsucrose	3,6'-二芥子酰基蔗糖	Phenolic acids	酚酸类	Phenolic acids	酚酸类	139891-98-8	3	47846	49451	48847	47205	42220	69334	59870	59450	59526	30203	26566	29160	22441	34032	43188	31936	21818	24861	28298	34551	40287	42575
pmp001105	1	C33H40O20	Kaempferol-3-O-neohesperidoside-7-O-glucoside	山奈酚-3-O-新橙皮糖苷-7-O-葡萄糖苷	Flavonoids	黄酮	Flavonols	黄酮醇	-	2	243460	196140	173520	165810	260550	110030	104190	176610	176130	104730	91863	49876	48162	42706	82773	60815	53192	144510	101670	125770	106340	134280
Hmcp001559	2	C33H40O20	Isorhamnetin-3-O-rutinoside-7-O-arabinoside	异鼠李素-3-O-芸香糖苷-7-O-阿拉伯糖苷	Flavonoids	黄酮	Flavonols	黄酮醇	-	2	9548.1	17652	21913	30452	22350	32011	13529	12986	19758	23548	35240	21263	53281	44684	67657	25483	16701	8385.1	40637	57310	57812	47864
Lmsp003161	1	C33H40O20	Kaempferol-3-O-sophoroside-7-O-rhamnoside	山奈酚-3-O-槐糖苷-7-O-鼠李糖苷	Flavonoids	黄酮	Flavonols	黄酮醇	-	2	253950	177220	203830	235900	187280	168160	117640	115390	152460	125410	86070	118740	32281	49046	88997	106490	40303	175160	127750	150430	153410	178080
HJAP127	1	C33H40O20	Quercetin-3-O-(2''-O-Rhamnosyl)rutinoside	槲皮素-3-O-(2''-O-鼠李糖基)芸香糖苷	Flavonoids	黄酮	Flavonols	黄酮醇	55696-57-6	1	46592000	48588000	49970000	51031000	50690000	49655000	45914000	52005000	49567000	27308000	27012000	30885000	20635000	28571000	36284000	20413000	22070000	27432000	38581000	38049000	36711000	38427000
Hmcp001329	1	C32H38O21	Quercetin-3-O-xylosyl(1→2)glucosyl(1→2)glucoside	槲皮素-3-O-木糖基(1→2)葡萄糖基(1→2)葡萄糖苷	Flavonoids	黄酮	Flavonols	黄酮醇	-	2	394460	379680	348200	617190	475900	532110	327270	412360	452170	52697	33909	36498	26905	37005	87284	52057	28729	44701	134850	155150	156740	179460
Lmjp003206	1	C32H38O21	Quercetin-3-O-Sambubioside-5-O-Glucoside	槲皮素-3-O-桑布双糖苷-5-O-葡萄糖苷	Flavonoids	黄酮	Flavonols	黄酮醇	-	2	3167600	3117700	3183200	3312000	3165300	3084000	2466700	2950500	3343700	1505900	1496500	1584700	904890	1535300	1998800	1169000	1183600	1382200	2083000	2049200	2045300	2325700
pmn001505	1	C41H64O13	Oleanolic acid-3-O-xylosyl(1→3)glucuronide	齐墩果酸-3-O-木糖基(1→3)葡萄糖醛酸苷	Terpenoids	萜类	Triterpene Saponin	三萜皂苷	-	2	90939	96060	76388	39113	40600	49601	26163	55142	44096	67280	77929	78813	22615	15372	31047	8280.6	13607	15492	33054	31501	30690	27898
Lmsp002982	1	C33H40O21	Quercetin-3-O-sophoroside-7-O-rhamnoside	槲皮素-3-O-槐糖苷-7-O-鼠李糖苷	Flavonoids	黄酮	Flavonols	黄酮醇	-	2	3643700	2645000	2888900	3433100	2956000	2463800	1743300	2329200	2432600	284050	271100	264060	174250	195450	514950	103720	155840	254940	1183400	1272900	1291500	1151700
Lmmp002334	1	C33H40O21	Quercetin-3-O-rutinoside-7-O-glucoside	槲皮素-3-O-芸香糖苷-7-O-葡萄糖苷	Flavonoids	黄酮	Flavonols	黄酮醇	-	2	3466800	2419400	2814100	2933500	3073300	2163600	1628600	2137100	2311900	270090	258930	257160	180590	165270	399090	150960	135000	236050	1138200	1207800	1187600	1179100
Lmqp002170	1	C33H40O21	Kaempferol-3-O-sophorotrioside	山奈酚-3-O-槐三糖苷	Flavonoids	黄酮	Flavonols	黄酮醇	80714-53-0	3	151360	119500	130700	115510	133000	101300	70826	94003	117520	5103.1	12461	10143	9126.6	7693.5	18252	4063.5	10545	12799	48816	47722	59248	50581
HJAP023	1	C33H40O21	Kaempferol-6,8-di-C-glucoside-7-O-glucoside	山奈酚-6,8-二-C-葡萄糖苷-7-O-葡萄糖苷	Flavonoids	黄酮	Flavonoid carbonoside	黄酮碳糖苷	-	3	414170	330940	380280	412980	351130	295510	217720	269400	358370	41158	19317	36506	23406	20007	66002	12877	9571.1	26262	132440	158320	159510	153250
Hmcp001589	1	C34H42O21	Isorhamnetin-3-O-rutinoside-4'-O-glucoside*	异鼠李素-3-O-芸香糖苷-4'-O-葡萄糖苷*	Flavonoids	黄酮	Flavonols	黄酮醇	111393-97-6	2	585160	428390	475610	432630	388520	377520	303710	399070	330580	277870	186620	198680	230950	169610	282550	116090	141070	101270	397900	390870	418620	386080
Lmsp003790	1	C34H42O21	Isorhamnetin-3-O-sophoroside-7-O-rhamnoside*	异鼠李素-3-O-槐糖苷-7-O-鼠李糖苷*	Flavonoids	黄酮	Flavonols	黄酮醇	41328-75-0	2	690130	446920	453430	482930	496250	395700	362440	397730	335940	297950	200720	188570	217180	179050	305190	129700	143300	103920	397270	441760	431910	425440
Lmsp003853	1	C42H46O23	Quercetin-3-O-(6''-O-p-coumaroyl)sophoroside-7-O-rhamnoside	槲皮素-3-O-(6''-O-对香豆酰)槐糖苷-7-O-鼠李糖苷	Flavonoids	黄酮	Flavonols	黄酮醇	-	3	103180	43362	91598	51518	40773	54578	30757	52001	36782	1426.5	7416.7	1657.9	3231.6	4111.5	10673	2321.7	3697.1	7299.5	23862	24520	19384	27062
HJAP123	1	C40H52O25	Isorhamnetin-3-O-rutinoside-7-O-rutinoside	异鼠李素-3-O-芸香糖苷-7-O-芸香糖苷	Flavonoids	黄酮	Flavonols	黄酮醇	-	1	316330	204990	275780	276100	233550	231120	217140	250970	228100	94069	56465	56447	45422	32060	148140	35622	51619	55691	228370	228390	236710	252560
MWSmce590	2	C47H74O19	Deslanoside	去乙酰毛花苷	Steroids	甾体	Cardiac glycoside	强心苷	17598-65-1	3	5233.1	1005	3088.3	15629	13724	22702	44386	20264	22000	30312	67043	49307	228200	195640	89494	137070	190950	103750	60101	61152	72749	67623
