# Supplementary material for: Transcriptomic and Metabolomic Analysis of the Response of Quinoa Seedlings to Low Temperatures
Source: Biomolecules. 2022 Jul 12;12(7):977. doi: 10.3390/biom12070977 (PMC9312504; doi:10.3390/biom12070977)
Supplement: Supplementary file 1 [file biomolecules-12-00977-s001.zip › Table.S3.xls]

## Sheet: CY1 VS AY1
ID	KEGG	AY1-1	AY1-2	AY1-3	AY2-1	AY2-2	AY2-3	BY1-1	BY1-2	BY1-3	BY2-1	BY2-2	BY2-3	CY1-1	CY1-2	CY1-3	CY2-1	CY2-2	CY2-3
gene-LOC110703412	K00224 chloroplastic oxoene reductase [EC:1.3.1.-] | (RefSeq) quinone-oxidoreductase homolog, chloroplastic-like (A)	0.45	0.32	0.8	0.14	0.38	0.25	6.07	8.78	8.12	1.7	1.63	1.75	3.94	1.87	4.87	1.54	0.76	2.59
gene-LOC110703416	K00224 chloroplastic oxoene reductase [EC:1.3.1.-] | (RefSeq) quinone-oxidoreductase homolog, chloroplastic (A)	7.68	6.45	8.15	11.33	5.56	7.97	15.92	13.45	15.24	22.72	22.89	20.94	22.65	16.15	30.56	24.6	29.05	23.87
gene-LOC110687794	K00224 chloroplastic oxoene reductase [EC:1.3.1.-] | (RefSeq) quinone-oxidoreductase homolog, chloroplastic-like (A)	18.66	18.26	16.82	27.64	16.13	18.54	24.37	27.79	29.27	32.61	34.16	31.11	28.18	26.08	36.53	39.99	37.1	50.12
gene-LOC110710870	K00232 acyl-CoA oxidase [EC:1.3.3.6] | (RefSeq) acyl-coenzyme A oxidase 4, peroxisomal-like (A)	11.34	11.9	12.39	15.58	20.96	17.32	20.48	25.7	20.36	12.74	12.54	15.35	3.36	4.96	3.23	3.81	2.87	5.16
gene-LOC110718230	K00232 acyl-CoA oxidase [EC:1.3.3.6] | (RefSeq) acyl-coenzyme A oxidase 2, peroxisomal-like (A)	8.74	16.98	4.15	6.37	16.01	13.92	7.56	8.8	8.43	3.47	0.95	4.71	1.8	2.88	1.15	1.39	2.13	1.85
gene-LOC110682188	K00232 acyl-CoA oxidase [EC:1.3.3.6] | (RefSeq) acyl-coenzyme A oxidase 2, peroxisomal-like (A)	18.88	25.03	11.47	19.17	50.11	32.95	9.96	7.36	6.49	3.91	6.36	6.48	1.74	3.65	1.71	2.82	2.02	2.39
gene-LOC110722825	K00232 acyl-CoA oxidase [EC:1.3.3.6] | (RefSeq) peroxisomal acyl-coenzyme A oxidase 1-like (A)	35.52	45.05	37.87	59.01	61.12	53.5	38.47	34.41	41.16	33.04	41.76	43.91	13.59	19.34	13.2	18.49	12.9	15.41
gene-LOC110733915	K00232 acyl-CoA oxidase [EC:1.3.3.6] | (RefSeq) acyl-coenzyme A oxidase 4, peroxisomal-like (A)	44.18	67.2	32.59	6.5	15.47	12.33	55.88	69.66	50.79	2.95	1.66	2.72	5.7	14.44	7.17	1.59	1.83	2.51
gene-LOC110736160	K00454 lipoxygenase [EC:1.13.11.12] | (RefSeq) linoleate 13S-lipoxygenase 2-1, chloroplastic-like (A)	0.34	0.25	0.19	2.18	3.14	0.28	0.08	0.06	0.02	0.34	0.17	0.33	1.44	0.54	0.97	0.62	0.29	0.96
gene-LOC110736163	K00454 lipoxygenase [EC:1.13.11.12] | (RefSeq) linoleate 13S-lipoxygenase 2-1, chloroplastic-like (A)	8.73	1.06	16.56	0.52	0.14	0.44	0.87	1.22	6.82	0.6	0.25	0.29	0	0.11	0.02	0.26	0.08	2
gene-LOC110690870	K01047 secretory phospholipase A2 [EC:3.1.1.4] | (RefSeq) phospholipase A2-alpha-like (A)	1.25	1.67	0.54	0.61	0.49	0.9	1.87	2.78	4.53	7.13	7.85	8.03	4.39	8.05	4.59	1.9	2.3	1.73
gene-LOC110692289	K01047 secretory phospholipase A2 [EC:3.1.1.4] | (RefSeq) phospholipase A2-alpha-like (A)	1.9	1.94	0.89	0.51	0.74	1.61	3.72	5	4.53	7.73	8.12	9.65	5.43	7.44	6.68	3.56	3.49	2.38
gene-LOC110705015	K01723 hydroperoxide dehydratase [EC:4.2.1.92] | (RefSeq) allene oxide synthase 3-like isoform X1 (A)	2.58	1.53	1.45	6.23	4.98	3.2	2.93	2.79	3.33	4.03	2.29	2.4	0.54	0.9	0.61	2.68	1.49	2.85
gene-LOC110686405	K01723 hydroperoxide dehydratase [EC:4.2.1.92] | (RefSeq) allene oxide synthase 1, chloroplastic-like (A)	0.8	0.68	0.93	1.14	1.03	0.98	1.03	1.46	1.2	0.91	0.89	1.22	1.15	8.97	0.83	1.58	1.28	1.09
gene-LOC110690148	K01723 hydroperoxide dehydratase [EC:4.2.1.92] | (RefSeq) allene oxide synthase 1, chloroplastic-like (A)	0.34	1.57	0.64	0.89	3.85	1.32	0.87	0.48	0.98	0.49	0.6	0.9	0.86	11.18	1.34	1.45	0.63	1.08
gene-LOC110682087	K05894 12-oxophytodienoic acid reductase [EC:1.3.1.42] | (RefSeq) artemisinic aldehyde Delta(11(13)) reductase-like isoform X1 (A)	0.41	0.43	0.35	0.46	0.85	0.8	5.39	4.43	4.5	7.93	5.99	7.64	2.6	1.72	1.84	3.29	1.7	1.8
gene-LOC110695254	K05894 12-oxophytodienoic acid reductase [EC:1.3.1.42] | (RefSeq) 12-oxophytodienoate reductase 3-like (A)	1.13	0.64	1.03	0.81	0.75	0.43	19	14.9	11.7	11.09	12.06	13.1	21.95	11.66	16.03	13.15	10.26	14
gene-LOC110726766	K07513 acetyl-CoA acyltransferase 1 [EC:2.3.1.16] | (RefSeq) 3-ketoacyl-CoA thiolase 2, peroxisomal (A)	122.07	81.29	106.41	115.53	130.55	118.71	101.06	92.26	93.23	55.08	63.29	63.95	30.1	33.26	30.17	38.43	31.18	46.09
gene-LOC110724788	K08241 jasmonate O-methyltransferase [EC:2.1.1.141] | (RefSeq) salicylate carboxymethyltransferase-like (A)	9.01	3.55	14.39	7.35	3.53	3.22	35.67	46.9	51.01	35.68	26.04	22.85	33.7	32.86	42.1	36.31	13.88	14.23
novel.2215	K08241 jasmonate O-methyltransferase [EC:2.1.1.141] | (RefSeq) caffeine synthase 1-like isoform X1 (A)	0	0.241255	0	0.191201	0.717462	0.294304	0.185137	0.061633	0.177073	0.530152	0.60594	1.41277	0.349649	1.76254	0.805207	0.335047	0.417619	0.216582
gene-LOC110724846	K10525 allene oxide cyclase [EC:5.3.99.6] | (RefSeq) allene oxide cyclase, chloroplastic-like (A)	1.35	4.33	3.58	1.04	1.55	2.58	15.7	13.07	13.07	6.34	7	13.36	7.41	55.73	7.85	6.08	5.45	3.79
gene-LOC110728173	K10525 allene oxide cyclase [EC:5.3.99.6] | (RefSeq) allene oxide cyclase, chloroplastic-like (A)	0.52	4.55	1.86	1.94	3.91	3.35	5.99	3.5	4.68	3.7	5.65	9.57	5.77	44.11	6.82	7.53	7.61	6.37
gene-LOC110691262	K10525 allene oxide cyclase [EC:5.3.99.6] | (RefSeq) allene oxide cyclase, chloroplastic-like (A)	0	0.07	0	0.18	2.76	0.39	0.09	0.09	0	0.57	0.58	0.33	0.54	0.66	1.27	3.64	0.78	0.39
gene-LOC110707499	K10527 enoyl-CoA hydratase/3-hydroxyacyl-CoA dehydrogenase [EC:4.2.1.17 1.1.1.35 1.1.1.211] | (RefSeq) peroxisomal fatty acid beta-oxidation multifunctional protein MFP2-like (A)	46.47	67.81	18.21	115.67	156.46	127.44	28.7	25.88	19.39	19.9	29.56	37.81	1.01	2.27	3.99	7.2	7.83	19.22
gene-LOC110707751	K10527 enoyl-CoA hydratase/3-hydroxyacyl-CoA dehydrogenase [EC:4.2.1.17 1.1.1.35 1.1.1.211] | (RefSeq) peroxisomal fatty acid beta-oxidation multifunctional protein AIM1-like (A)	17.75	22.47	16.45	26.12	31.35	31.45	14.74	18.13	13.79	14.76	21.61	27.03	6.87	10.91	6.73	8.11	6.55	8.96
gene-LOC110735020	K10527 enoyl-CoA hydratase/3-hydroxyacyl-CoA dehydrogenase [EC:4.2.1.17 1.1.1.35 1.1.1.211] | (RefSeq) peroxisomal fatty acid beta-oxidation multifunctional protein MFP2-like (A)	59.76	61.59	44.25	74.08	82.57	70.38	55.36	50.53	38.25	19.99	27.94	32.72	5.46	16.11	6.07	6.16	4.75	9.81
gene-LOC110691089	K10527 enoyl-CoA hydratase/3-hydroxyacyl-CoA dehydrogenase [EC:4.2.1.17 1.1.1.35 1.1.1.211] | (RefSeq) peroxisomal fatty acid beta-oxidation multifunctional protein AIM1 (A)	1.25	2.06	0.49	0.35	0.3	0.31	0.13	0.12	0.12	0.32	0.29	0.24	0.24	0.21	0.1	0	0.1	0.14
gene-LOC110709113	K16818 phospholipase A1 [EC:3.1.1.32] | (RefSeq) phospholipase A(1) DAD1, chloroplastic-like (A)	1.11	2.73	1.11	0.84	1.87	0.85	0.24	0.33	0.18	0.22	0.34	0.44	0.32	0.22	0.06	0.16	0	0.38
gene-LOC110716178	K16818 phospholipase A1 [EC:3.1.1.32] | (RefSeq) phospholipase A(1) DAD1, chloroplastic-like (A)	113.73	80.51	134.84	88.15	117.94	106.31	94.72	83.8	80.6	42.53	49.25	47.42	32.95	41.99	38.43	23.33	24.24	37.5
gene-LOC110730326	K16818 phospholipase A1 [EC:3.1.1.32] | (RefSeq) glycerolipase A1 (A)	0.1	0	0.11	0.31	1.29	0.45	0.21	0.02	0.49	1.14	1.06	0.48	0.41	3.16	1.49	2.59	2.02	1.97
gene-LOC110696053	K16818 phospholipase A1 [EC:3.1.1.32] | (RefSeq) phospholipase A(1) DAD1, chloroplastic (A)	7.13	5.21	12.31	3.7	15.7	13.5	19.77	21.38	20.84	17.45	15.32	13.77	34.62	20.47	31.71	29.85	28.97	35.42
gene-LOC110733207	K22389 phospholipase A1 [EC:3.1.1.32] | (RefSeq) lecithin-cholesterol acyltransferase-like 4 (A)	11.71	18.93	10.22	17.39	20.38	17.32	12.91	13.81	13.97	8.84	9.54	11.22	4.48	6.38	5.51	5.95	5.1	10.9
Index	Formula	Compounds	物质	AY1-1	AY1-2	AY1-3	AY2-1	AY2-2	AY2-3	BY1-1	BY1-2	BY1-3	BY2-1	BY2-2	BY2-3	CY1-1	CY1-2	CY1-3	CY2-1	CY2-2	CY2-3
Lmbn003524	C9H16O3	9-Oxononanoic acid	9-氧代壬酸	19442	33818	16631	39325	21597	23217	8645.5	9870.6	60250	8031.2	8179.3	10456	10659	9008.5	7302.2	11715	12200	12585
Zmyn004732	C18H30O3	2R-hydroxy-9Z,12Z,15Z-octadecatrienoic acid	2R-羟基-9Z,12Z,15Z-十八碳三烯酸	26226	54834	41249	109730	63818	80732	2439.2	1483.7	23394	7485	5152.7	24190	3744.3	7097.4	4156.7	19546	5952.1	16922
Zmpn003368	C18H30O3	13S-Hydroxy-9Z,11E,15Z-octadecatrienoic acid	13S-羟基-9Z,11E,15Z-十八碳三烯酸	195750	171170	283350	515620	311350	276260	623740	673320	782860	338460	408790	796590	599010	714050	743310	954870	390240	401570
Zmyn004676	C18H30O3	17-Hydroxylinolenic acid	17-羟基亚麻酸	779400	849220	794340	2568500	1896200	1722700	49273	64700	112870	113940	65204	107500	61871	277710	116130	130400	61826	105370
pmb2786	C18H30O3	9-Hydroxy-10,12,15-octadecatrienoic acid*	9-羟基-10,12,15-十八碳三烯酸*	25847	25719	31599	53352	26838	49032	6393.3	9728.4	6627.6	4439.7	8743.5	7255.4	8188.5	13003	14241	33513	4648.1	4649.9
Zmyn004449	C18H30O4	9-Hydroxy-12-oxo-10(E),15(Z)-octadecadienoic acid	9-羟基-12-氧代-10(E),15(Z)-十八碳二烯酸	13003	21694	48736	68707	16572	25915	2654.7	3317.6	19273	7904.8	2973.7	15608	6020.2	11142	4216.7	10329	3695.9	10610
pmn001689	C18H32O4	9-Hydroxy-12-oxo-15(Z)-octadecenoic acid	9-羟基-12-氧代-15(Z)-十八碳烯酸	113250	140320	118600	167040	68304	208180	9199.8	10318	8637.7	5904.7	10108	10119	12901	21581	21396	12892	6992.4	6088.9

## Sheet: CY2 VS AY2
ID	KEGG	AY1-1	AY1-2	AY1-3	AY2-1	AY2-2	AY2-3	BY1-1	BY1-2	BY1-3	BY2-1	BY2-2	BY2-3	CY1-1	CY1-2	CY1-3	CY2-1	CY2-2	CY2-3
gene-LOC110703412	K00224 chloroplastic oxoene reductase [EC:1.3.1.-] | (RefSeq) quinone-oxidoreductase homolog, chloroplastic-like (A)	0.45	0.32	0.8	0.14	0.38	0.25	6.07	8.78	8.12	1.7	1.63	1.75	3.94	1.87	4.87	1.54	0.76	2.59
gene-LOC110703416	K00224 chloroplastic oxoene reductase [EC:1.3.1.-] | (RefSeq) quinone-oxidoreductase homolog, chloroplastic (A)	7.68	6.45	8.15	11.33	5.56	7.97	15.92	13.45	15.24	22.72	22.89	20.94	22.65	16.15	30.56	24.6	29.05	23.87
gene-LOC110687794	K00224 chloroplastic oxoene reductase [EC:1.3.1.-] | (RefSeq) quinone-oxidoreductase homolog, chloroplastic-like (A)	18.66	18.26	16.82	27.64	16.13	18.54	24.37	27.79	29.27	32.61	34.16	31.11	28.18	26.08	36.53	39.99	37.1	50.12
gene-LOC110687796	K00224 chloroplastic oxoene reductase [EC:1.3.1.-] | (RefSeq) quinone-oxidoreductase homolog, chloroplastic-like (A)	3.16	2.93	2.32	10.74	11.41	7.76	1.92	1	2.19	3.63	2.96	6.4	1.47	3.92	2.5	3.48	2.48	3.7
gene-LOC110710870	K00232 acyl-CoA oxidase [EC:1.3.3.6] | (RefSeq) acyl-coenzyme A oxidase 4, peroxisomal-like (A)	11.34	11.9	12.39	15.58	20.96	17.32	20.48	25.7	20.36	12.74	12.54	15.35	3.36	4.96	3.23	3.81	2.87	5.16
gene-LOC110718230	K00232 acyl-CoA oxidase [EC:1.3.3.6] | (RefSeq) acyl-coenzyme A oxidase 2, peroxisomal-like (A)	8.74	16.98	4.15	6.37	16.01	13.92	7.56	8.8	8.43	3.47	0.95	4.71	1.8	2.88	1.15	1.39	2.13	1.85
gene-LOC110682188	K00232 acyl-CoA oxidase [EC:1.3.3.6] | (RefSeq) acyl-coenzyme A oxidase 2, peroxisomal-like (A)	18.88	25.03	11.47	19.17	50.11	32.95	9.96	7.36	6.49	3.91	6.36	6.48	1.74	3.65	1.71	2.82	2.02	2.39
gene-LOC110722825	K00232 acyl-CoA oxidase [EC:1.3.3.6] | (RefSeq) peroxisomal acyl-coenzyme A oxidase 1-like (A)	35.52	45.05	37.87	59.01	61.12	53.5	38.47	34.41	41.16	33.04	41.76	43.91	13.59	19.34	13.2	18.49	12.9	15.41
gene-LOC110733915	K00232 acyl-CoA oxidase [EC:1.3.3.6] | (RefSeq) acyl-coenzyme A oxidase 4, peroxisomal-like (A)	44.18	67.2	32.59	6.5	15.47	12.33	55.88	69.66	50.79	2.95	1.66	2.72	5.7	14.44	7.17	1.59	1.83	2.51
gene-LOC110710574	K00454 lipoxygenase [EC:1.13.11.12] | (RefSeq) lipoxygenase 6, chloroplastic-like (A)	1.3	1.46	1.77	0.41	0.99	2.36	3.61	3.01	4.46	3.96	4.12	4.43	2.06	2.52	2.82	4.05	2.75	4.81
gene-LOC110718504	K00454 lipoxygenase [EC:1.13.11.12] | (RefSeq) linoleate 13S-lipoxygenase 2-1, chloroplastic-like (A)	6.69	0.7	11.29	1.85	0.96	1.01	9.48	10.19	11.4	10.03	25.68	6.54	24.44	5.55	7.31	11.35	17.93	6.85
gene-LOC110690870	K01047 secretory phospholipase A2 [EC:3.1.1.4] | (RefSeq) phospholipase A2-alpha-like (A)	1.25	1.67	0.54	0.61	0.49	0.9	1.87	2.78	4.53	7.13	7.85	8.03	4.39	8.05	4.59	1.9	2.3	1.73
gene-LOC110692289	K01047 secretory phospholipase A2 [EC:3.1.1.4] | (RefSeq) phospholipase A2-alpha-like (A)	1.9	1.94	0.89	0.51	0.74	1.61	3.72	5	4.53	7.73	8.12	9.65	5.43	7.44	6.68	3.56	3.49	2.38
gene-LOC110715921	K05894 12-oxophytodienoic acid reductase [EC:1.3.1.42] | (RefSeq) 12-oxophytodienoate reductase 3-like (A)	0	0.12	0.23	0.24	0.45	0.47	0.37	0.19	0.51	0.33	0.59	0.3	0.23	17.25	0.46	1.33	1.05	0.56
gene-LOC110682087	K05894 12-oxophytodienoic acid reductase [EC:1.3.1.42] | (RefSeq) artemisinic aldehyde Delta(11(13)) reductase-like isoform X1 (A)	0.41	0.43	0.35	0.46	0.85	0.8	5.39	4.43	4.5	7.93	5.99	7.64	2.6	1.72	1.84	3.29	1.7	1.8
gene-LOC110695254	K05894 12-oxophytodienoic acid reductase [EC:1.3.1.42] | (RefSeq) 12-oxophytodienoate reductase 3-like (A)	1.13	0.64	1.03	0.81	0.75	0.43	19	14.9	11.7	11.09	12.06	13.1	21.95	11.66	16.03	13.15	10.26	14
novel.2974	K05894 12-oxophytodienoic acid reductase [EC:1.3.1.42] | (RefSeq) 12-oxophytodienoate reductase 1-like (A)	0.620245	0	0.191299	1.12547	0.626439	0.951291	0.502197	0.524305	0.308864	2.75096	1.85323	3.9594	0.943338	0.436619	0.359534	6.77348	1.66926	2.52983
gene-LOC110726766	K07513 acetyl-CoA acyltransferase 1 [EC:2.3.1.16] | (RefSeq) 3-ketoacyl-CoA thiolase 2, peroxisomal (A)	122.07	81.29	106.41	115.53	130.55	118.71	101.06	92.26	93.23	55.08	63.29	63.95	30.1	33.26	30.17	38.43	31.18	46.09
gene-LOC110728089	K07513 acetyl-CoA acyltransferase 1 [EC:2.3.1.16] | (RefSeq) 3-ketoacyl-CoA thiolase 2, peroxisomal-like (A)	1.31	2.72	2.17	1.4	3.38	3.91	1.85	1.7	2.13	3.29	5.29	6.85	1.31	4.64	1.05	0.47	0.2	0.49
gene-LOC110724788	K08241 jasmonate O-methyltransferase [EC:2.1.1.141] | (RefSeq) salicylate carboxymethyltransferase-like (A)	9.01	3.55	14.39	7.35	3.53	3.22	35.67	46.9	51.01	35.68	26.04	22.85	33.7	32.86	42.1	36.31	13.88	14.23
gene-LOC110724846	K10525 allene oxide cyclase [EC:5.3.99.6] | (RefSeq) allene oxide cyclase, chloroplastic-like (A)	1.35	4.33	3.58	1.04	1.55	2.58	15.7	13.07	13.07	6.34	7	13.36	7.41	55.73	7.85	6.08	5.45	3.79
gene-LOC110728173	K10525 allene oxide cyclase [EC:5.3.99.6] | (RefSeq) allene oxide cyclase, chloroplastic-like (A)	0.52	4.55	1.86	1.94	3.91	3.35	5.99	3.5	4.68	3.7	5.65	9.57	5.77	44.11	6.82	7.53	7.61	6.37
gene-LOC110703662	K10526 OPC-8:0 CoA ligase 1 [EC:6.2.1.-] | (RefSeq) 4-coumarate--CoA ligase-like 5 (A)	0.06	1.31	0.58	0.59	0.83	0.69	0.94	0.58	1.39	0.8	1.67	1.84	0.34	2.65	0.7	1.3	1.3	1.23
gene-LOC110727161	K10526 OPC-8:0 CoA ligase 1 [EC:6.2.1.-] | (RefSeq) 4-coumarate--CoA ligase-like 5 (A)	2.26	0.89	3	1.04	5.7	3.27	1.22	2.18	2.38	0.3	0.54	0.84	0.73	0.94	1.16	0.25	0	0.39
gene-LOC110707499	K10527 enoyl-CoA hydratase/3-hydroxyacyl-CoA dehydrogenase [EC:4.2.1.17 1.1.1.35 1.1.1.211] | (RefSeq) peroxisomal fatty acid beta-oxidation multifunctional protein MFP2-like (A)	46.47	67.81	18.21	115.67	156.46	127.44	28.7	25.88	19.39	19.9	29.56	37.81	1.01	2.27	3.99	7.2	7.83	19.22
gene-LOC110707751	K10527 enoyl-CoA hydratase/3-hydroxyacyl-CoA dehydrogenase [EC:4.2.1.17 1.1.1.35 1.1.1.211] | (RefSeq) peroxisomal fatty acid beta-oxidation multifunctional protein AIM1-like (A)	17.75	22.47	16.45	26.12	31.35	31.45	14.74	18.13	13.79	14.76	21.61	27.03	6.87	10.91	6.73	8.11	6.55	8.96
gene-LOC110735020	K10527 enoyl-CoA hydratase/3-hydroxyacyl-CoA dehydrogenase [EC:4.2.1.17 1.1.1.35 1.1.1.211] | (RefSeq) peroxisomal fatty acid beta-oxidation multifunctional protein MFP2-like (A)	59.76	61.59	44.25	74.08	82.57	70.38	55.36	50.53	38.25	19.99	27.94	32.72	5.46	16.11	6.07	6.16	4.75	9.81
gene-LOC110690998	K10527 enoyl-CoA hydratase/3-hydroxyacyl-CoA dehydrogenase [EC:4.2.1.17 1.1.1.35 1.1.1.211] | (RefSeq) peroxisomal fatty acid beta-oxidation multifunctional protein AIM1-like (A)	15.5	17.03	12.18	19.11	23.76	18.74	18.23	19.14	18.52	13.08	16.67	23.24	4.99	12	6.17	8.17	5.59	6.65
gene-LOC110716178	K16818 phospholipase A1 [EC:3.1.1.32] | (RefSeq) phospholipase A(1) DAD1, chloroplastic-like (A)	113.73	80.51	134.84	88.15	117.94	106.31	94.72	83.8	80.6	42.53	49.25	47.42	32.95	41.99	38.43	23.33	24.24	37.5
gene-LOC110730326	K16818 phospholipase A1 [EC:3.1.1.32] | (RefSeq) glycerolipase A1 (A)	0.1	0	0.11	0.31	1.29	0.45	0.21	0.02	0.49	1.14	1.06	0.48	0.41	3.16	1.49	2.59	2.02	1.97
gene-LOC110734411	K16818 phospholipase A1 [EC:3.1.1.32] | (RefSeq) glycerolipase A1 (A)	0.43	1.35	0.33	0.36	4.57	2.98	0.59	1.62	0.38	0.44	0.24	0.52	0.38	0.73	0.17	0.1	0.27	0.38
gene-LOC110736244	K16818 phospholipase A1 [EC:3.1.1.32] | (RefSeq) phospholipase A(1) DAD1, chloroplastic (A)	43.54	16.98	38.13	16.42	35.38	33.69	31.95	44.53	35.89	48.45	27.71	32.73	33.49	26.87	30.03	39.57	37.4	64.36
gene-LOC110696053	K16818 phospholipase A1 [EC:3.1.1.32] | (RefSeq) phospholipase A(1) DAD1, chloroplastic (A)	7.13	5.21	12.31	3.7	15.7	13.5	19.77	21.38	20.84	17.45	15.32	13.77	34.62	20.47	31.71	29.85	28.97	35.42
gene-LOC110728096	K18857 alcohol dehydrogenase class-P [EC:1.1.1.1] | (RefSeq) alcohol dehydrogenase 1-like (A)	52.53	33.21	65.28	20.37	30.93	48.62	43.48	36.22	33.28	36.82	39.65	33.17	112.16	67.46	82.47	59.89	49.27	50.45
Index	Formula	Compounds	物质	AY1-1	AY1-2	AY1-3	AY2-1	AY2-2	AY2-3	BY1-1	BY1-2	BY1-3	BY2-1	BY2-2	BY2-3	CY1-1	CY1-2	CY1-3	CY2-1	CY2-2	CY2-3
Lmbn003524	C9H16O3	9-Oxononanoic acid	9-氧代壬酸	19442	33818	16631	39325	21597	23217	8645.5	9870.6	60250	8031.2	8179.3	10456	10659	9008.5	7302.2	11715	12200	12585
Zmyn004548	C18H28O3	12-Oxo-phytodienoic acid	12-氧-植物二烯酸	9119.6	10603	11819	8909.3	5769.4	6854.1	2633.7	3630.8	3448.5	2136.7	3205.6	2538.5	4908	8023.4	4602.7	4140.9	2885.9	1951.8
Zmyn004732	C18H30O3	2R-hydroxy-9Z,12Z,15Z-octadecatrienoic acid	2R-羟基-9Z,12Z,15Z-十八碳三烯酸	26226	54834	41249	109730	63818	80732	2439.2	1483.7	23394	7485	5152.7	24190	3744.3	7097.4	4156.7	19546	5952.1	16922
Zmyn004676	C18H30O3	17-Hydroxylinolenic acid	17-羟基亚麻酸	779400	849220	794340	2568500	1896200	1722700	49273	64700	112870	113940	65204	107500	61871	277710	116130	130400	61826	105370
Zmyn004449	C18H30O4	9-Hydroxy-12-oxo-10(E),15(Z)-octadecadienoic acid	9-羟基-12-氧代-10(E),15(Z)-十八碳二烯酸	13003	21694	48736	68707	16572	25915	2654.7	3317.6	19273	7904.8	2973.7	15608	6020.2	11142	4216.7	10329	3695.9	10610
pmn001689	C18H32O4	9-Hydroxy-12-oxo-15(Z)-octadecenoic acid	9-羟基-12-氧代-15(Z)-十八碳烯酸	113250	140320	118600	167040	68304	208180	9199.8	10318	8637.7	5904.7	10108	10119	12901	21581	21396	12892	6992.4	6088.9
